# Supplementary material for: Crustal melting and continent uplift by mafic underplating at convergent boundaries
Source: Springer Nature journal article supplement (doi:10.1038/s41467-024-53435-7), 2024-10-19
Supplement: MOESM3 [file 41467_2024_53435_MOESM3_ESM.xlsx]

## Sheet: Figure 1
Figure 1
	Profile location			40.7344° E 37.0499° N — 43.7344° E 40.5168° N
	Seismic stations			c.f. Supplementary Table 1
	Topography			SRTM15_PLUS
	Neogene to Quaternary volcanics			modified from 1:500,000 Geological map, https://www.mta.gov.tr/en/maps/geological-500000
	Faults and sutures			Summarized from
				Şengör et al., 2003, https://doi.org/10.1029/2003GL017858
				Topuz et al., 2017; https://doi.org/10.1130/G39111.1

## Sheet: Figure 2a-RFs
Figure 2a
Depth-migrated RFs
Distance/km	Depth/km (postive represents above sea level)	Normalized Amplitude
342.963	1.77568	1
342.987	1.63521	0.996127
343.011	1.49474	0.987407
343.036	1.35427	0.973986
343.06	1.2138	0.956065
343.085	1.07333	0.933895
343.109	0.93286	0.90777
343.133	0.79239	0.878017
343.158	0.65192	0.844996
343.182	0.51145	0.809087
343.206	0.37098	0.770684
343.231	0.23051	0.73019
343.255	0.09004	0.688008
343.28	-0.05043	0.644539
343.304	-0.1909	0.60017
343.328	-0.33137	0.555278
343.353	-0.47184	0.510219
343.377	-0.61231	0.465327
343.401	-0.75278	0.420916
343.426	-0.89325	0.377269
343.45	-1.03372	0.334649
343.475	-1.17419	0.293285
343.499	-1.31466	0.253386
343.523	-1.45513	0.21513
343.548	-1.59561	0.178672
343.572	-1.73608	0.144141
343.596	-1.87655	0.111644
343.621	-2.01702	0.0812666
343.645	-2.15749	0.0530744
343.67	-2.29796	0.0271145
343.694	-2.43843	0.00341754
343.718	-2.5789	-0.0180012
343.743	-2.71937	-0.0371396
343.767	-2.85984	-0.0540081
343.791	-3.00031	-0.0686274
343.816	-3.14078	-0.0810273
343.84	-3.28125	-0.0912457
343.865	-3.42172	-0.0993266
343.889	-3.56219	-0.105319
343.913	-3.70266	-0.109277
343.938	-3.84313	-0.111254
343.962	-3.9836	-0.111309
343.986	-4.12407	-0.109497
344.011	-4.26454	-0.105875
344.035	-4.40501	-0.100495
344.06	-4.54548	-0.0934087
344.084	-4.68595	-0.0846633
344.108	-4.82642	-0.074302
344.133	-4.96689	-0.062364
344.157	-5.10736	-0.048885
344.181	-5.24783	-0.0338976
344.206	-5.3883	-0.017432
344.23	-5.52877	0.000482238
344.255	-5.66924	0.0198147
344.279	-5.80971	0.0405318
344.303	-5.95018	0.0625951
344.328	-6.09065	0.0859574
344.352	-6.23112	0.110561
344.376	-6.37159	0.136336
344.401	-6.51206	0.163194
344.425	-6.65253	0.191029
344.45	-6.79301	0.219713
344.474	-6.93348	0.249097
344.498	-7.07395	0.279005
344.523	-7.21442	0.309239
344.547	-7.35489	0.339574
344.571	-7.49536	0.369763
344.596	-7.63583	0.399538
344.62	-7.7763	0.428612
344.645	-7.91677	0.456681
344.669	-8.05724	0.483434
344.693	-8.1977	0.508554
344.718	-8.3382	0.531725
344.742	-8.4786	0.552638
344.766	-8.6191	0.571002
344.791	-8.7596	0.586544
344.815	-8.9001	0.59902
344.84	-9.0405	0.608221
344.864	-9.181	0.613979
344.888	-9.3215	0.616172
344.913	-9.4619	0.614725
344.937	-9.6024	0.609619
344.961	-9.7429	0.600886
344.986	-9.8834	0.588616
345.01	-10.0238	0.57295
345.035	-10.1643	0.554082
345.059	-10.3048	0.532253
345.083	-10.4452	0.507747
345.108	-10.5857	0.480886
345.132	-10.7262	0.452023
345.156	-10.8666	0.421531
345.181	-11.0071	0.389803
345.205	-11.1476	0.357234
345.23	-11.2881	0.324224
345.254	-11.4285	0.291159
345.278	-11.569	0.258413
345.303	-11.7095	0.226337
345.327	-11.8499	0.195254
345.351	-11.9904	0.165452
345.376	-12.1309	0.137186
345.4	-12.2713	0.110668
345.425	-12.4118	0.0860714
345.449	-12.5523	0.063528
345.473	-12.6928	0.043128
345.498	-12.8332	0.0249224
345.522	-12.9737	0.00892523
345.546	-13.1142	-0.00488345
345.571	-13.2546	-0.0165543
345.595	-13.3951	-0.0261641
345.62	-13.5356	-0.0338122
345.644	-13.676	-0.0396156
345.668	-13.8165	-0.043705
345.693	-13.957	-0.0462201
345.717	-14.0975	-0.0473064
345.741	-14.2379	-0.047111
345.766	-14.3784	-0.0457797
345.79	-14.5189	-0.0434543
345.815	-14.6593	-0.0402706
345.839	-14.7998	-0.0363565
345.863	-14.9403	-0.0318311
345.888	-15.0808	-0.0268039
345.912	-15.2212	-0.0213745
345.936	-15.3617	-0.015633
345.961	-15.5022	-0.00966066
345.985	-15.6426	-0.00353009
346.01	-15.7831	0.00269304
346.034	-15.9236	0.00894937
346.058	-16.064	0.0151845
346.083	-16.2045	0.021348
346.107	-16.345	0.027392
346.131	-16.4855	0.0332705
346.156	-16.6259	0.0389384
346.18	-16.7664	0.0443511
346.205	-16.9069	0.0494641
346.229	-17.0473	0.0542324
346.253	-17.1878	0.0586113
346.278	-17.3283	0.0625563
346.302	-17.4687	0.0660237
346.326	-17.6092	0.0689716
346.351	-17.7497	0.0713601
346.375	-17.8902	0.0731534
346.4	-18.0306	0.0743195
346.424	-18.1711	0.0748328
346.448	-18.3116	0.0746736
346.473	-18.452	0.0738305
346.497	-18.5925	0.0722998
346.521	-18.733	0.0700878
346.546	-18.8734	0.0672095
346.57	-19.0139	0.0636907
346.595	-19.1544	0.0595664
346.619	-19.2949	0.0548812
346.643	-19.4353	0.0496891
346.668	-19.5758	0.0440523
346.692	-19.7163	0.0380401
346.716	-19.8567	0.0317281
346.741	-19.9972	0.0251964
346.765	-20.1377	0.0185286
346.79	-20.2782	0.011809
346.814	-20.4186	0.0051231
346.838	-20.5591	-0.00144674
346.863	-20.6996	-0.00782065
346.887	-20.84	-0.0139241
346.911	-20.9805	-0.0196889
346.936	-21.121	-0.0250541
346.96	-21.2614	-0.0299673
346.985	-21.4019	-0.0343857
347.009	-21.5424	-0.0382759
347.033	-21.6829	-0.041615
347.058	-21.8233	-0.0443899
347.082	-21.9638	-0.0465977
347.106	-22.1043	-0.0482446
347.131	-22.2447	-0.0493463
347.155	-22.3852	-0.049926
347.18	-22.5257	-0.0500144
347.204	-22.6661	-0.0496483
347.228	-22.8066	-0.0488695
347.253	-22.9471	-0.0477235
347.277	-23.0876	-0.0462588
347.301	-23.228	-0.0445255
347.326	-23.3685	-0.0425745
347.35	-23.509	-0.0404558
347.375	-23.6494	-0.0382191
347.399	-23.7899	-0.0359116
347.423	-23.9304	-0.0335783
347.448	-24.0708	-0.0312614
347.472	-24.2113	-0.029
347.496	-24.3518	-0.0268295
347.521	-24.4923	-0.0247825
347.545	-24.6327	-0.0228877
347.57	-24.7732	-0.021171
347.594	-24.9137	-0.0196548
347.618	-25.0541	-0.0183594
347.643	-25.1946	-0.0173021
347.667	-25.3351	-0.0164981
347.691	-25.4756	-0.0159606
347.716	-25.616	-0.0157013
347.74	-25.7565	-0.01573
347.765	-25.897	-0.016055
347.789	-26.0374	-0.0166834
347.813	-26.1779	-0.0176208
347.838	-26.3184	-0.0188708
347.862	-26.4588	-0.0204355
347.886	-26.5993	-0.0223147
347.911	-26.7398	-0.0245056
347.935	-26.8803	-0.0270027
347.96	-27.0207	-0.0297968
347.984	-27.1612	-0.0328749
348.008	-27.3017	-0.0362197
348.033	-27.4421	-0.0398089
348.057	-27.5826	-0.0436153
348.081	-27.7231	-0.0476051
348.106	-27.8635	-0.0517396
348.13	-28.004	-0.0559734
348.155	-28.1445	-0.0602548
348.179	-28.285	-0.0645262
348.203	-28.4254	-0.0687239
348.228	-28.5659	-0.0727786
348.252	-28.7064	-0.0766161
348.276	-28.8468	-0.0801573
348.301	-28.9873	-0.0833202
348.325	-29.1278	-0.0860196
348.35	-29.2682	-0.0881687
348.374	-29.4087	-0.0896805
348.398	-29.5492	-0.0904685
348.423	-29.6897	-0.0904486
348.447	-29.8301	-0.0895402
348.471	-29.9706	-0.0876674
348.496	-30.1111	-0.0847609
348.52	-30.2515	-0.0807589
348.545	-30.392	-0.0756087
348.569	-30.5325	-0.0692682
348.593	-30.673	-0.0617065
348.618	-30.8134	-0.0529058
348.642	-30.9539	-0.0428621
348.666	-31.0944	-0.0315859
348.691	-31.2348	-0.0191036
348.715	-31.3753	-0.0054572
348.74	-31.5158	0.00929445
348.764	-31.6562	0.0250758
348.788	-31.7967	0.0417945
348.813	-31.9372	0.0593421
348.837	-32.0777	0.077594
348.861	-32.2181	0.0964106
348.886	-32.3586	0.115638
348.91	-32.4991	0.135112
348.935	-32.6395	0.154654
348.959	-32.78	0.174082
348.983	-32.9205	0.193203
349.008	-33.0609	0.211823
349.032	-33.2014	0.229749
349.056	-33.3419	0.246789
349.081	-33.4824	0.262757
349.105	-33.6228	0.277474
349.13	-33.7633	0.290778
349.154	-33.9038	0.302519
349.178	-34.0442	0.312565
349.203	-34.1847	0.320804
349.227	-34.3252	0.32715
349.251	-34.4656	0.331537
349.276	-34.6061	0.333927
349.3	-34.7466	0.334307
349.325	-34.8871	0.332689
349.349	-35.0275	0.329114
349.373	-35.168	0.323642
349.398	-35.3085	0.31636
349.422	-35.4489	0.307374
349.446	-35.5894	0.296808
349.471	-35.7299	0.2848
349.495	-35.8704	0.271503
349.52	-36.0108	0.257078
349.544	-36.1513	0.24169
349.568	-36.2918	0.22551
349.593	-36.4322	0.208707
349.617	-36.5727	0.191448
349.641	-36.7132	0.173896
349.666	-36.8536	0.156205
349.69	-36.9941	0.138523
349.715	-37.1346	0.120986
349.739	-37.2751	0.103721
349.763	-37.4155	0.0868448
349.788	-37.556	0.0704614
349.812	-37.6965	0.054666
349.837	-37.8369	0.039543
349.861	-37.9774	0.0251679
349.885	-38.1179	0.0116079
349.91	-38.2583	-0.0010772
349.934	-38.3988	-0.0128336
349.958	-38.5393	-0.0236132
349.983	-38.6798	-0.0333718
350.007	-38.8202	-0.0420692
350.031	-38.9607	-0.0496675
350.056	-39.1012	-0.0561316
350.08	-39.2416	-0.061428
350.105	-39.3821	-0.0655253
350.129	-39.5226	-0.0683935
350.153	-39.6631	-0.0700045
350.178	-39.8035	-0.0703326
350.202	-39.944	-0.0693547
350.226	-40.0845	-0.0670505
350.251	-40.2249	-0.0634041
350.275	-40.3654	-0.058404
350.3	-40.5059	-0.0520442
350.324	-40.6463	-0.0443254
350.348	-40.7868	-0.0352557
350.373	-40.9273	-0.0248517
350.397	-41.0678	-0.0131396
350.421	-41.2082	-0.0001564
350.446	-41.3487	0.0140495
350.47	-41.4892	0.0294168
350.495	-41.6296	0.0458711
350.519	-41.7701	0.0633235
350.543	-41.9106	0.081671
350.568	-42.051	0.100795
350.592	-42.1915	0.120562
350.616	-42.332	0.140825
350.641	-42.4725	0.161421
350.665	-42.6129	0.182176
350.69	-42.7534	0.202903
350.714	-42.8939	0.223405
350.738	-43.0343	0.243479
350.763	-43.1748	0.262914
350.787	-43.3153	0.2815
350.811	-43.4557	0.299025
350.836	-43.5962	0.315282
350.86	-43.7367	0.330073
350.885	-43.8772	0.343209
350.909	-44.0176	0.354516
350.933	-44.1581	0.363837
350.958	-44.2986	0.371036
350.982	-44.439	0.375999
351.007	-44.5795	0.378637
351.031	-44.72	0.378887
351.055	-44.8605	0.376715
351.08	-45.0009	0.372114
351.104	-45.1414	0.365102
351.128	-45.2819	0.355729
351.153	-45.4223	0.344066
351.177	-45.5628	0.330211
351.202	-45.7033	0.31428
351.226	-45.8437	0.296413
351.25	-45.9842	0.276763
351.275	-46.1247	0.255499
351.299	-46.2652	0.2328
351.323	-46.4056	0.208854
351.348	-46.5461	0.183854
351.372	-46.6866	0.157997
351.397	-46.827	0.131483
351.421	-46.9675	0.104508
351.445	-47.108	0.0772688
351.47	-47.2484	0.0499573
351.494	-47.3889	0.0227614
351.518	-47.5294	-0.00413679
351.543	-47.6699	-0.0305609
351.567	-47.8103	-0.0563418
351.592	-47.9508	-0.0813171
351.616	-48.0913	-0.105333
351.64	-48.2317	-0.128244
351.665	-48.3722	-0.149914
351.689	-48.5127	-0.170216
351.713	-48.6531	-0.189036
351.738	-48.7936	-0.206269
351.762	-48.9341	-0.221827
351.787	-49.0746	-0.235633
351.811	-49.215	-0.247626
351.835	-49.3555	-0.257761
351.86	-49.496	-0.266013
351.884	-49.6364	-0.27237
351.908	-49.7769	-0.276844
351.933	-49.9174	-0.279462
351.957	-50.0579	-0.28027
351.982	-50.1983	-0.279334
352.006	-50.3388	-0.276736
352.03	-50.4793	-0.272573
352.055	-50.6197	-0.26696
352.079	-50.7602	-0.260022
352.103	-50.9007	-0.251896
352.128	-51.0411	-0.242726
352.152	-51.1816	-0.232662
352.177	-51.3221	-0.22186
352.201	-51.4626	-0.210472
352.225	-51.603	-0.198652
352.25	-51.7435	-0.186547
352.274	-51.884	-0.174299
352.298	-52.0244	-0.162041
352.323	-52.1649	-0.149897
352.347	-52.3054	-0.137978
352.372	-52.4458	-0.126383
352.396	-52.5863	-0.115198
352.42	-52.7268	-0.104495
352.445	-52.8673	-0.0943352
352.469	-53.0077	-0.0847635
352.493	-53.1482	-0.0758144
352.518	-53.2887	-0.0675099
352.542	-53.4291	-0.0598623
352.567	-53.5696	-0.052874
352.591	-53.7101	-0.0465395
352.615	-53.8505	-0.0408467
352.64	-53.991	-0.0357781
352.664	-54.1315	-0.0313121
352.688	-54.272	-0.0274244
352.713	-54.4124	-0.0240892
352.737	-54.5529	-0.0212803
352.762	-54.6934	-0.0189717
352.786	-54.8338	-0.0171392
352.81	-54.9743	-0.0157603
352.835	-55.1148	-0.0148153
352.859	-55.2553	-0.0142875
352.883	-55.3957	-0.0141637
352.908	-55.5362	-0.0144339
352.932	-55.6767	-0.015092
352.957	-55.8171	-0.016135
352.981	-55.9576	-0.0175636
353.005	-56.0981	-0.0193815
353.03	-56.2385	-0.021595
353.054	-56.379	-0.024213
353.078	-56.5195	-0.0272463
353.103	-56.66	-0.0307068
353.127	-56.8004	-0.0346081
353.151	-56.9409	-0.0389632
353.176	-57.0814	-0.043786
353.2	-57.2218	-0.0490886
353.225	-57.3623	-0.0548827
353.249	-57.5028	-0.0611773
353.273	-57.6432	-0.0679796
353.298	-57.7837	-0.0752931
353.322	-57.9242	-0.0831182
353.346	-58.0647	-0.0914509
353.371	-58.2051	-0.100283
353.395	-58.3456	-0.109599
353.42	-58.4861	-0.119381
353.444	-58.6265	-0.129604
353.468	-58.767	-0.140234
353.493	-58.9075	-0.151235
353.517	-59.0479	-0.162559
353.541	-59.1884	-0.174154
353.566	-59.3289	-0.185961
353.59	-59.4694	-0.197912
353.615	-59.6098	-0.209934
353.639	-59.7503	-0.221946
353.663	-59.8908	-0.233862
353.688	-60.0312	-0.245589
353.712	-60.1717	-0.257031
353.736	-60.3122	-0.268089
353.761	-60.4527	-0.278658
353.785	-60.5931	-0.288637
353.81	-60.7336	-0.297922
353.834	-60.8741	-0.306412
353.858	-61.0145	-0.31401
353.883	-61.155	-0.320624
353.907	-61.2955	-0.32617
353.931	-61.4359	-0.330573
353.956	-61.5764	-0.33377
353.98	-61.7169	-0.335708
354.005	-61.8574	-0.336349
354.029	-61.9978	-0.335671
354.053	-62.1383	-0.333665
354.078	-62.2788	-0.330341
354.102	-62.4192	-0.325724
354.126	-62.5597	-0.319855
354.151	-62.7002	-0.312791
354.175	-62.8406	-0.304604
354.2	-62.9811	-0.295379
354.224	-63.1216	-0.285213
354.248	-63.2621	-0.274215
354.273	-63.4025	-0.262499
354.297	-63.543	-0.250189
354.321	-63.6835	-0.237408
354.346	-63.8239	-0.224285
354.37	-63.9644	-0.210945
354.395	-64.1049	-0.197512
354.419	-64.2453	-0.184104
354.443	-64.3858	-0.170833
354.468	-64.5263	-0.157804
354.492	-64.6668	-0.145108
354.517	-64.8072	-0.132832
354.541	-64.9477	-0.121046
354.565	-65.0882	-0.109813
354.59	-65.2286	-0.0991821
354.614	-65.3691	-0.089191
354.638	-65.5096	-0.0798677
354.663	-65.6501	-0.0712299
354.687	-65.7905	-0.0632856
354.712	-65.931	-0.056035
354.736	-66.0715	-0.049471
354.76	-66.2119	-0.0435808
354.785	-66.3524	-0.0383466
354.809	-66.4929	-0.0337474
354.833	-66.6333	-0.0297594
354.858	-66.7738	-0.0263576
354.882	-66.9143	-0.0235168
354.906	-67.0548	-0.0212118
354.931	-67.1952	-0.019419
354.955	-67.3357	-0.0181156
354.98	-67.4762	-0.0172815
355.004	-67.6166	-0.0168984
355.028	-67.7571	-0.0169505
355.053	-67.8976	-0.0174238
355.077	-68.038	-0.0183067
355.101	-68.1785	-0.0195888
355.126	-68.319	-0.0212611
355.15	-68.4594	-0.023315
355.175	-68.5999	-0.0257419
355.199	-68.7403	-0.0285326
355.223	-68.8808	-0.0316764
355.248	-69.0213	-0.0351607
355.272	-69.1617	-0.0389697
355.296	-69.3022	-0.043085
355.321	-69.4427	-0.0474835
355.345	-69.5831	-0.0521381
355.37	-69.7236	-0.0570172
355.394	-69.8641	-0.0620842
355.418	-70.0046	-0.0672976
355.443	-70.145	-0.0726113
355.467	-70.2855	-0.077975
355.491	-70.426	-0.0833346
355.516	-70.5664	-0.0886322
355.54	-70.7069	-0.0938084
355.565	-70.8474	-0.0988019
355.589	-70.9879	-0.103551
355.613	-71.1283	-0.107996
355.638	-71.2688	-0.112077
355.662	-71.4093	-0.115739
355.686	-71.5497	-0.118932
355.711	-71.6902	-0.12161
355.735	-71.8307	-0.123735
355.76	-71.9711	-0.125276
355.784	-72.1116	-0.12621
355.808	-72.2521	-0.126523
355.833	-72.3926	-0.12621
355.857	-72.533	-0.125277
355.881	-72.6735	-0.123737
355.906	-72.814	-0.121613
355.93	-72.9544	-0.118934
355.955	-73.0949	-0.11574
355.979	-73.2354	-0.112076
356.003	-73.3758	-0.107991
356.028	-73.5163	-0.103541
356.052	-73.6568	-0.0987836
356.077	-73.7973	-0.093778
356.101	-73.9377	-0.0885846
356.125	-74.0782	-0.0832634
356.15	-74.2187	-0.077872
356.174	-74.3591	-0.0724655
356.198	-74.4996	-0.0670949
356.223	-74.6401	-0.0618072
356.247	-74.7805	-0.0566434
356.272	-74.921	-0.0516396
356.296	-75.0615	-0.0468249
356.32	-75.202	-0.0422229
356.345	-75.3424	-0.03785
356.369	-75.4829	-0.0337169
356.393	-75.6234	-0.0298273
356.418	-75.7638	-0.0261794
356.442	-75.9043	-0.0227652
356.466	-76.0448	-0.0195712
356.491	-76.1853	-0.0165786
356.515	-76.3257	-0.0137637
356.54	-76.4662	-0.0110977
356.564	-76.6067	-0.00854787
356.588	-76.7471	-0.00607708
356.613	-76.8876	-0.00364442
356.637	-77.0281	-0.00120498
356.661	-77.1685	0.00128929
356.686	-77.309	0.00388996
356.71	-77.4495	0.00665135
356.735	-77.59	0.00963078
356.759	-77.7304	0.0128877
356.783	-77.8709	0.0164835
356.808	-78.0114	0.0204811
356.832	-78.1518	0.0249439
356.856	-78.2923	0.0299351
356.881	-78.4328	0.0355172
356.905	-78.5732	0.04175
356.93	-78.7137	0.0486901
356.954	-78.8542	0.0563892
356.978	-78.9947	0.0648924
357.003	-79.1351	0.0742368
357.027	-79.2756	0.0844497
357.051	-79.4161	0.0955468
357.076	-79.5565	0.107531
357.1	-79.697	0.12039
357.125	-79.8375	0.134095
357.149	-79.9779	0.148601
357.173	-80.1184	0.163844
357.198	-80.2589	0.179741
357.222	-80.3994	0.19619
357.246	-80.5398	0.213073
357.271	-80.6803	0.23025
357.295	-80.8208	0.247569
357.32	-80.9612	0.264862
357.344	-81.1017	0.281947
357.368	-81.2422	0.298636
357.393	-81.3827	0.314735
357.417	-81.5231	0.330047
357.441	-81.6636	0.344377
357.466	-81.8041	0.357537
357.49	-81.9445	0.369348
357.515	-82.085	0.379646
357.539	-82.2255	0.388285
357.563	-82.3659	0.39514
357.588	-82.5064	0.400109
357.612	-82.6469	0.403121
357.636	-82.7874	0.404129
357.661	-82.9278	0.403119
357.685	-83.0683	0.400105
357.71	-83.2088	0.395133
357.734	-83.3492	0.388275
357.758	-83.4897	0.379632
357.783	-83.6302	0.369328
357.807	-83.7706	0.357509
357.832	-83.9111	0.34434
357.856	-84.0516	0.329996
357.88	-84.1921	0.314668
357.905	-84.3325	0.298547
357.929	-84.473	0.281828
357.953	-84.6135	0.264705
357.978	-84.7539	0.247364
358.002	-84.8944	0.229983
358.026	-85.0349	0.212725
358.051	-85.1753	0.195741
358.075	-85.3158	0.179162
358.1	-85.4563	0.163103
358.124	-85.5968	0.147657
358.148	-85.7372	0.132899
358.173	-85.8777	0.118881
358.197	-86.0182	0.105637
358.222	-86.1586	0.0931819
358.246	-86.2991	0.0815106
358.27	-86.4396	0.0706023
358.295	-86.5801	0.0604201
358.319	-86.7205	0.0509131
358.343	-86.861	0.0420182
358.368	-87.0015	0.033661
358.392	-87.1419	0.0257586
358.417	-87.2824	0.0182207
358.441	-87.4229	0.0109509
358.465	-87.5633	0.00384912
358.49	-87.7038	-0.00318744
358.514	-87.8443	-0.0102624
358.538	-87.9848	-0.0174791
358.563	-88.1252	-0.0249382
358.587	-88.2657	-0.0327374
358.612	-88.4062	-0.0409687
358.636	-88.5466	-0.0497176
358.66	-88.6871	-0.059061
358.685	-88.8276	-0.0690663
358.709	-88.968	-0.0797888
358.733	-89.1085	-0.0912712
358.758	-89.249	-0.103541
358.782	-89.3895	-0.11661
358.807	-89.5299	-0.130473
358.831	-89.6704	-0.145107
358.855	-89.8109	-0.160467
358.88	-89.9513	-0.176491
358.904	-90.0918	-0.193098
358.928	-90.2323	-0.210184
358.953	-90.3727	-0.227629
358.977	-90.5132	-0.245295
359.002	-90.6537	-0.263026
359.026	-90.7942	-0.280654
359.05	-90.9346	-0.297998
359.075	-91.0751	-0.31487
359.099	-91.2156	-0.331076
359.123	-91.356	-0.346419
359.148	-91.4965	-0.360708
359.172	-91.637	-0.373753
359.197	-91.7775	-0.385377
359.221	-91.9179	-0.395416
359.245	-92.0584	-0.403723
359.27	-92.1989	-0.41017
359.294	-92.3393	-0.414654
359.318	-92.4798	-0.417096
359.343	-92.6203	-0.417442
359.367	-92.7607	-0.415669
359.392	-92.9012	-0.411778
359.416	-93.0417	-0.4058
359.44	-93.1822	-0.397792
359.465	-93.3226	-0.387833
359.489	-93.4631	-0.376027
359.513	-93.6036	-0.362497
359.538	-93.744	-0.347382
359.562	-93.8845	-0.330832
359.587	-94.025	-0.31301
359.611	-94.1654	-0.294082
359.635	-94.3059	-0.274219
359.66	-94.4464	-0.253588
359.684	-94.5869	-0.232356
359.708	-94.7273	-0.21068
359.733	-94.8678	-0.188711
359.757	-95.0083	-0.16659
359.782	-95.1487	-0.144445
359.806	-95.2892	-0.122393
359.83	-95.4297	-0.100541
359.855	-95.5701	-0.0789811
359.879	-95.7106	-0.0577979
359.903	-95.8511	-0.0370648
359.928	-95.9916	-0.0168477
359.952	-96.132	0.00279422
359.977	-96.2725	0.0218061
360.001	-96.413	0.0401365
360.025	-96.5534	0.0577348
360.05	-96.6939	0.0745507
360.074	-96.8344	0.0905322
360.098	-96.9749	0.105625
360.123	-97.1153	0.119771
360.147	-97.2558	0.132909
360.172	-97.3963	0.144976
360.196	-97.5367	0.155903
360.22	-97.6772	0.165622
360.245	-97.8177	0.174062
360.269	-97.9581	0.181152
360.293	-98.0986	0.186826
360.318	-98.239	0.191018
360.342	-98.38	0.193671
360.367	-98.52	0.194736
360.391	-98.66	0.194171
360.415	-98.801	0.191949
360.44	-98.941	0.188057
360.464	-99.082	0.182494
360.488	-99.222	0.17528
360.513	-99.363	0.166448
360.537	-99.503	0.156055
360.562	-99.644	0.144172
360.586	-99.784	0.130891
360.61	-99.925	0.116321
360.635	-100.065	0.10059
360.659	-100.206	0.0838406
360.683	-100.346	0.0662304
360.708	-100.487	0.0479294
360.732	-100.627	0.0291186
360.757	-100.768	0.00998589
360.781	-100.908	-0.00927478
360.805	-101.048	-0.0284676
360.83	-101.189	-0.0473971
360.854	-101.329	-0.0658714
360.878	-101.47	-0.0837051
360.903	-101.61	-0.100722
360.927	-101.751	-0.116757
360.952	-101.891	-0.131662
360.976	-102.032	-0.145302
361	-102.172	-0.157562
361.025	-102.313	-0.168347
361.049	-102.453	-0.177584
361.073	-102.594	-0.18522
361.098	-102.734	-0.191223
361.122	-102.875	-0.195584
361.147	-103.015	-0.198315
361.171	-103.156	-0.199446
361.195	-103.296	-0.199027
361.22	-103.436	-0.197122
361.244	-103.577	-0.193809
361.268	-103.717	-0.189178
361.293	-103.858	-0.183327
361.317	-103.998	-0.17636
361.342	-104.139	-0.168382
361.366	-104.279	-0.159501
361.39	-104.42	-0.149821
361.415	-104.56	-0.139439
361.439	-104.701	-0.128447
361.464	-104.841	-0.116927
361.488	-104.982	-0.104952
361.512	-105.122	-0.0925803
361.537	-105.263	-0.0798611
361.561	-105.403	-0.0668301
361.585	-105.544	-0.0535117
361.61	-105.684	-0.0399194
361.634	-105.824	-0.026057
361.659	-105.965	-0.0119209
361.683	-106.105	0.00249844
361.707	-106.246	0.017214
361.732	-106.386	0.0322398
361.756	-106.527	0.047588
361.78	-106.667	0.0632665
361.805	-106.808	0.0792767
361.829	-106.948	0.0956099
361.853	-107.089	0.112247
361.878	-107.229	0.129154
361.902	-107.37	0.146284
361.927	-107.51	0.163573
361.951	-107.651	0.180943
361.975	-107.791	0.198297
362	-107.932	0.215525
362.024	-108.072	0.232502
362.048	-108.212	0.249093
362.073	-108.353	0.265149
362.097	-108.493	0.280519
362.122	-108.634	0.295046
362.146	-108.774	0.308572
362.17	-108.915	0.320946
362.195	-109.055	0.332021
362.219	-109.196	0.341663
362.243	-109.336	0.349753
362.268	-109.477	0.356188
362.292	-109.617	0.36089
362.317	-109.758	0.3638
362.341	-109.898	0.364888
362.365	-110.039	0.364148
362.39	-110.179	0.361601
362.414	-110.32	0.357297
362.438	-110.46	0.351311
362.463	-110.6	0.343741
362.487	-110.741	0.334711
362.512	-110.881	0.324362
362.536	-111.022	0.312853
362.56	-111.162	0.300358
362.585	-111.303	0.28706
362.609	-111.443	0.273149
362.633	-111.584	0.258818
362.658	-111.724	0.24426
362.682	-111.865	0.229663
362.707	-112.005	0.215208
362.731	-112.146	0.201068
362.755	-112.286	0.187401
362.78	-112.427	0.174354
362.804	-112.567	0.162056
362.828	-112.708	0.150619
362.853	-112.848	0.140137
362.877	-112.988	0.130688
362.902	-113.129	0.12233
362.926	-113.269	0.115101
362.95	-113.41	0.109024
362.975	-113.55	0.104105
362.999	-113.691	0.100331
363.024	-113.831	0.0976755
363.048	-113.972	0.0960983
363.072	-114.112	0.095545
363.097	-114.253	0.0959494
363.121	-114.393	0.0972345
363.145	-114.534	0.0993143
363.17	-114.674	0.102094
363.194	-114.815	0.105473
363.219	-114.955	0.109344
363.243	-115.096	0.113596
363.267	-115.236	0.118119
363.292	-115.376	0.122796
363.316	-115.517	0.127517
363.34	-115.657	0.132169
363.365	-115.798	0.136648
363.389	-115.938	0.14085
363.413	-116.079	0.144683
363.438	-116.219	0.148061
363.462	-116.36	0.150908
363.487	-116.5	0.153158
363.511	-116.641	0.154758
363.535	-116.781	0.155666
363.56	-116.922	0.155856
363.584	-117.062	0.155311
363.608	-117.203	0.154031
363.633	-117.343	0.152025
363.657	-117.484	0.149317
363.682	-117.624	0.145941
363.706	-117.764	0.141942
363.73	-117.905	0.137372
363.755	-118.045	0.132293
363.779	-118.186	0.126771
363.803	-118.326	0.120878
363.828	-118.467	0.114687
363.852	-118.607	0.108272
363.877	-118.748	0.101708
363.901	-118.888	0.0950668
363.925	-119.029	0.0884176
363.95	-119.169	0.0818248
363.974	-119.31	0.0753475
363.998	-119.45	0.0690389
364.023	-119.591	0.0629455
364.047	-119.731	0.0571069
364.072	-119.872	0.051556
364.096	-120.012	0.0463182
364.12	-120.152	0.0414129
364.145	-120.293	0.0368526
364.169	-120.433	0.032645
364.193	-120.574	0.0287915
364.218	-120.714	0.0252904
364.242	-120.855	0.0221355
364.267	-120.995	0.0193184
364.291	-121.136	0.0168284
364.315	-121.276	0.0146541
364.34	-121.417	0.0127833
364.364	-121.557	0.0112047
364.388	-121.698	0.00990808
364.413	-121.838	0.00888493
364.437	-121.979	0.00812951
364.462	-122.119	0.00763923
364.486	-122.26	0.00741489
364.51	-122.4	0.0074617
364.535	-122.54	0.00778904
364.559	-122.681	0.00841155
364.583	-122.821	0.00934862
364.608	-122.962	0.010625
364.632	-123.102	0.0122707
364.657	-123.243	0.0143211
364.681	-123.383	0.0168166
364.705	-123.524	0.0198023
364.73	-123.664	0.0233279
364.754	-123.805	0.0274466
364.779	-123.945	0.032215
364.803	-124.086	0.037691
364.827	-124.226	0.0439339
364.852	-124.367	0.0510024
364.876	-124.507	0.058953
364.9	-124.647	0.0678387
364.925	-124.788	0.0777069
364.949	-124.928	0.0885972
364.974	-125.069	0.10054
364.998	-125.209	0.113554
365.022	-125.35	0.127644
365.047	-125.49	0.142799
365.071	-125.631	0.158992
365.095	-125.771	0.176174
365.12	-125.912	0.19428
365.144	-126.052	0.213221
365.168	-126.193	0.232887
365.193	-126.333	0.253146
365.217	-126.474	0.273847
365.242	-126.614	0.294817
365.266	-126.755	0.315868
365.29	-126.895	0.336794
365.315	-127.035	0.357378
365.339	-127.176	0.377393
365.363	-127.316	0.396608
365.388	-127.457	0.414789
365.412	-127.597	0.431709
365.437	-127.738	0.447145
365.461	-127.878	0.460891
365.485	-128.019	0.472755
365.51	-128.159	0.482569
365.534	-128.3	0.490189
365.558	-128.44	0.495499
365.583	-128.581	0.498416
365.607	-128.721	0.498886
365.632	-128.862	0.496894
365.656	-129.002	0.492456
365.68	-129.143	0.485621
365.705	-129.283	0.476472
365.729	-129.423	0.46512
365.753	-129.564	0.451703
365.778	-129.704	0.436382
365.802	-129.845	0.419338
365.827	-129.985	0.400766
365.851	-130.126	0.380869
365.875	-130.266	0.359858
365.9	-130.407	0.337943
365.924	-130.547	0.315331
365.948	-130.688	0.292221
365.973	-130.828	0.268799
365.997	-130.969	0.24524
366.022	-131.109	0.221698
366.046	-131.25	0.198311
366.07	-131.39	0.175198
366.095	-131.531	0.152454
366.119	-131.671	0.130159
366.143	-131.811	0.10837
366.168	-131.952	0.0871281
366.192	-132.092	0.0664585
366.217	-132.233	0.0463725
366.241	-132.373	0.0268701
366.265	-132.514	0.00794307
366.29	-132.654	-0.010423
366.314	-132.795	-0.0282452
366.339	-132.935	-0.0455417
366.363	-133.076	-0.0623281
366.387	-133.216	-0.0786167
366.412	-133.357	-0.0944134
366.436	-133.497	-0.109717
366.46	-133.638	-0.124519
366.485	-133.778	-0.138801
366.509	-133.919	-0.152535
366.534	-134.059	-0.165686
366.558	-134.199	-0.17821
366.582	-134.34	-0.190056
366.607	-134.48	-0.201167
366.631	-134.621	-0.211484
366.655	-134.761	-0.220942
366.68	-134.902	-0.22948
366.704	-135.042	-0.237037
366.728	-135.183	-0.243556
366.753	-135.323	-0.248986
366.777	-135.464	-0.253287
366.802	-135.604	-0.256425
366.826	-135.745	-0.25838
366.85	-135.885	-0.259145
366.875	-136.026	-0.258726
366.899	-136.166	-0.257144
366.923	-136.307	-0.254433
366.948	-136.447	-0.250645
366.972	-136.587	-0.245844
366.997	-136.728	-0.240107
367.021	-136.868	-0.233524
367.045	-137.009	-0.226196
367.07	-137.149	-0.218233
367.094	-137.29	-0.209753
367.118	-137.43	-0.200878
367.143	-137.571	-0.191735
367.167	-137.711	-0.182451
367.192	-137.852	-0.173153
367.216	-137.992	-0.163964
367.24	-138.133	-0.155004
367.265	-138.273	-0.146385
367.289	-138.414	-0.138212
367.313	-138.554	-0.130578
367.338	-138.695	-0.123567
367.362	-138.835	-0.117251
367.387	-138.975	-0.11169
367.411	-139.116	-0.106927
367.435	-139.256	-0.102996
367.46	-139.397	-0.0999148
367.484	-139.537	-0.0976863
367.508	-139.678	-0.0963012
367.533	-139.818	-0.0957366
367.557	-139.959	-0.0959568
367.582	-140.099	-0.096914
367.606	-140.24	-0.0985496
367.63	-140.38	-0.100794
367.655	-140.521	-0.103571
367.679	-140.661	-0.106794
367.703	-140.802	-0.110373
367.728	-140.942	-0.11421
367.752	-141.083	-0.118209
367.777	-141.223	-0.122268
367.801	-141.363	-0.126288
367.825	-141.504	-0.130172
367.85	-141.644	-0.133827
367.874	-141.785	-0.137164
367.899	-141.925	-0.140103
367.923	-142.066	-0.142572
367.947	-142.206	-0.144508
367.972	-142.347	-0.14586
367.996	-142.487	-0.146587
368.02	-142.628	-0.146661
368.045	-142.768	-0.146067
368.069	-142.909	-0.144801
368.094	-143.049	-0.142874
368.118	-143.19	-0.140305
368.142	-143.33	-0.137128
368.167	-143.471	-0.133383
368.191	-143.611	-0.129123
368.215	-143.751	-0.124405
368.24	-143.892	-0.119295
368.264	-144.032	-0.113863
368.288	-144.173	-0.108183
368.313	-144.313	-0.102329
368.337	-144.454	-0.0963779
368.362	-144.594	-0.0904054
368.386	-144.735	-0.0844854
368.41	-144.875	-0.0786895
368.435	-145.016	-0.0730858
368.459	-145.156	-0.0677387
368.483	-145.297	-0.0627082
368.508	-145.437	-0.05805
368.532	-145.578	-0.0538149
368.557	-145.718	-0.0500494
368.581	-145.859	-0.0467958
368.605	-145.999	-0.044092
368.63	-146.139	-0.0419724
368.654	-146.28	-0.0404675
368.678	-146.42	-0.0396051
368.703	-146.561	-0.0394094
368.727	-146.701	-0.0399021
368.752	-146.842	-0.0411021
368.776	-146.982	-0.043025
368.8	-147.123	-0.0456838
368.825	-147.263	-0.0490879
368.849	-147.404	-0.0532428
368.873	-147.544	-0.0581497
368.898	-147.685	-0.0638049
368.922	-147.825	-0.0701989
368.947	-147.966	-0.0773159
368.971	-148.106	-0.085133
368.995	-148.247	-0.0936195
369.02	-148.387	-0.102736
369.044	-148.527	-0.112436
369.068	-148.668	-0.12266
369.093	-148.808	-0.133344
369.117	-148.949	-0.14441
369.142	-149.089	-0.155776
369.166	-149.23	-0.167348
369.19	-149.37	-0.179024
369.215	-149.511	-0.190699
369.239	-149.651	-0.20226
369.263	-149.792	-0.213591
369.288	-149.932	-0.224573
369.312	-150.073	-0.235089
369.337	-150.213	-0.245022
369.361	-150.354	-0.254258
369.385	-150.494	-0.262691
369.41	-150.634	-0.270221
369.434	-150.775	-0.276759
369.458	-150.915	-0.282225
369.483	-151.056	-0.286554
369.507	-151.196	-0.289693
369.532	-151.337	-0.291605
369.556	-151.477	-0.292269
369.58	-151.618	-0.291679
369.605	-151.758	-0.289845
369.629	-151.899	-0.286794
369.654	-152.039	-0.282565
369.678	-152.18	-0.277216
369.702	-152.32	-0.270813
369.727	-152.461	-0.263436
369.751	-152.601	-0.255175
369.775	-152.742	-0.246128
369.8	-152.882	-0.236398
369.824	-153.022	-0.226094
369.849	-153.163	-0.215328
369.873	-153.303	-0.20421
369.897	-153.444	-0.192851
369.922	-153.584	-0.18136
369.946	-153.725	-0.169839
369.97	-153.865	-0.158386
369.995	-154.006	-0.147093
370.019	-154.146	-0.136043
370.043	-154.287	-0.125311
370.068	-154.427	-0.114963
370.092	-154.568	-0.105057
370.117	-154.708	-0.0956402
370.141	-154.849	-0.0867523
370.165	-154.989	-0.0784234
370.19	-155.13	-0.0706759
370.214	-155.27	-0.0635242
370.238	-155.41	-0.0569758
370.263	-155.551	-0.051032
370.287	-155.691	-0.0456886
370.312	-155.832	-0.0409363
370.336	-155.972	-0.0367621
370.36	-156.113	-0.0331497
370.385	-156.253	-0.0300798
370.409	-156.394	-0.0275313
370.433	-156.534	-0.0254815
370.458	-156.675	-0.0239062
370.482	-156.815	-0.0227806
370.507	-156.956	-0.0220793
370.531	-157.096	-0.0217759
370.555	-157.237	-0.021844
370.58	-157.377	-0.0222563
370.604	-157.518	-0.0229853
370.628	-157.658	-0.0240022
370.653	-157.798	-0.025278
370.677	-157.939	-0.026782
370.702	-158.079	-0.028483
370.726	-158.22	-0.0303478
370.75	-158.36	-0.0323425
370.775	-158.501	-0.0344311
370.799	-158.641	-0.0365766
370.823	-158.782	-0.0387404
370.848	-158.922	-0.0408829
370.872	-159.063	-0.0429633
370.897	-159.203	-0.0449405
370.921	-159.344	-0.0467723
370.945	-159.484	-0.0484174
370.97	-159.625	-0.0498341
370.994	-159.765	-0.0509826
371.018	-159.906	-0.0518235
371.043	-160.046	-0.0523204
371.067	-160.186	-0.0524385
371.092	-160.327	-0.0521465
371.116	-160.467	-0.051416
371.14	-160.608	-0.050223
371.165	-160.748	-0.0485471
371.189	-160.889	-0.046373
371.214	-161.029	-0.0436895
371.238	-161.17	-0.0404913
371.262	-161.31	-0.0367776
371.287	-161.451	-0.0325537
371.311	-161.591	-0.0278298
371.335	-161.732	-0.0226224
371.36	-161.872	-0.0169529
371.384	-162.013	-0.010849
371.409	-162.153	-0.0043437
371.433	-162.294	0.00252419
371.457	-162.434	0.00971082
371.482	-162.574	0.0171664
371.506	-162.715	0.0248366
371.53	-162.855	0.0326617
371.555	-162.996	0.0405778
371.579	-163.136	0.0485166
371.603	-163.277	0.056406
371.628	-163.417	0.0641713
371.652	-163.558	0.0717347
371.677	-163.698	0.0790168
371.701	-163.839	0.0859372
371.725	-163.979	0.0924152
371.75	-164.12	0.0983713
371.774	-164.26	0.103727
371.798	-164.401	0.108407
371.823	-164.541	0.112339
371.847	-164.682	0.115456
371.872	-164.822	0.117696
371.896	-164.962	0.119002
371.92	-165.103	0.119326
371.945	-165.243	0.118627
371.969	-165.384	0.116869
371.993	-165.524	0.11403
372.018	-165.665	0.110091
372.042	-165.805	0.105045
372.067	-165.946	0.0988943
372.091	-166.086	0.0916483
372.115	-166.227	0.0833264
372.14	-166.367	0.0739563
372.164	-166.508	0.0635744
372.188	-166.648	0.0522257
372.213	-166.789	0.0399631
372.237	-166.929	0.026848
372.262	-167.07	0.0129496
372.286	-167.21	-0.00165527
372.31	-167.35	-0.0168817
372.335	-167.491	-0.0326374
372.359	-167.631	-0.0488228
372.383	-167.772	-0.0653307
372.408	-167.912	-0.0820474
372.432	-168.053	-0.0988528
372.457	-168.193	-0.11562
372.481	-168.334	-0.132219
372.505	-168.474	-0.148512
372.53	-168.615	-0.164362
372.554	-168.755	-0.179627
372.578	-168.896	-0.194165
372.603	-169.036	-0.207836
372.627	-169.177	-0.220504
372.652	-169.317	-0.232035
372.676	-169.458	-0.242306
372.7	-169.598	-0.251199
372.725	-169.738	-0.25861
372.749	-169.879	-0.264448
372.774	-170.019	-0.268635
372.798	-170.16	-0.271114
372.822	-170.3	-0.271841
372.847	-170.441	-0.270796
372.871	-170.581	-0.267975
372.895	-170.722	-0.2634
372.92	-170.862	-0.257108
372.944	-171.003	-0.24916
372.969	-171.143	-0.239636
372.993	-171.284	-0.228634
373.017	-171.424	-0.216269
373.042	-171.565	-0.202674
373.066	-171.705	-0.187992
373.09	-171.846	-0.172381
373.115	-171.986	-0.156004
373.139	-172.126	-0.139035
373.163	-172.267	-0.121647
373.188	-172.407	-0.10402
373.212	-172.548	-0.0863274
373.237	-172.688	-0.0687435
373.261	-172.829	-0.0514345
373.285	-172.969	-0.0345595
373.31	-173.11	-0.0182676
373.334	-173.25	-0.00269642
373.358	-173.391	0.0120294
373.383	-173.531	0.0257993
373.407	-173.672	0.038518
373.432	-173.812	0.0501059
373.456	-173.953	0.0605
373.48	-174.093	0.0696535
373.505	-174.234	0.0775361
373.529	-174.374	0.0841335
373.553	-174.514	0.089447
373.578	-174.655	0.0934927
373.602	-174.795	0.0963008
373.627	-174.936	0.0979138
373.651	-175.076	0.0983864
373.675	-175.217	0.097783
373.7	-175.357	0.0961772
373.724	-175.498	0.0936498
373.749	-175.638	0.0902876
373.773	-175.779	0.0861816
373.797	-175.919	0.081426
373.822	-176.06	0.0761165
373.846	-176.2	0.070349
373.87	-176.341	0.0642185
373.895	-176.481	0.0578181
373.919	-176.621	0.0512377
373.944	-176.762	0.0445635
373.968	-176.902	0.0378772
373.992	-177.043	0.0312555
374.017	-177.183	0.0247695
374.041	-177.324	0.0184845
374.065	-177.464	0.0124598
374.09	-177.605	0.00674851
374.114	-177.745	0.00139785
374.139	-177.886	-0.00355129
374.163	-178.026	-0.00806383
374.187	-178.167	-0.0121106
374.212	-178.307	-0.0156681
374.236	-178.448	-0.0187181
374.26	-178.588	-0.0212478
374.285	-178.729	-0.0232493
374.309	-178.869	-0.0247195
374.334	-179.009	-0.0256599
374.358	-179.15	-0.0260764
374.382	-179.29	-0.025979
374.407	-179.431	-0.025382
374.431	-179.571	-0.0243031
374.455	-179.712	-0.0227642
374.48	-179.852	-0.0207905
374.504	-179.993	-0.0184106
374.529	-180.133	-0.0156562
374.553	-180.274	-0.0125626
374.577	-180.414	-0.00916754
374.602	-180.555	-0.00551189
374.626	-180.695	-0.0016389
374.65	-180.836	0.00240547
374.675	-180.976	0.00657352
374.699	-181.117	0.0108151
374.724	-181.257	0.0150788
374.748	-181.397	0.0193116
374.772	-181.538	0.0234599
374.797	-181.678	0.0274694
374.821	-181.819	0.0312857
374.845	-181.959	0.0348552
374.87	-182.1	0.0381251
374.894	-182.24	0.0410446
374.919	-182.381	0.0435652
374.943	-182.521	0.0456416
374.967	-182.662	0.0472325
374.992	-182.802	0.0483014
375.016	-182.943	0.0488172
375.04	-183.083	0.0487552
375.065	-183.224	0.0480985
375.089	-183.364	0.0468375
375.114	-183.505	0.0449722
375.138	-183.645	0.0425119
375.162	-183.785	0.0394764
375.187	-183.926	0.0358963
375.211	-184.066	0.0318142
375.235	-184.207	0.0272842
375.26	-184.347	0.022373
375.284	-184.488	0.0171592
375.309	-184.628	0.0117342
375.333	-184.769	0.00620084
375.357	-184.909	0.000673702
375.382	-185.05	-0.00472226
375.406	-185.19	-0.00985245
375.43	-185.331	-0.0145743
375.455	-185.471	-0.0187387
375.479	-185.612	-0.0221922
375.504	-185.752	-0.024779
375.528	-185.893	-0.026344
375.552	-186.033	-0.0267349
375.577	-186.173	-0.0258061
375.601	-186.314	-0.0234206
375.625	-186.454	-0.0194544
375.65	-186.595	-0.0137988
375.674	-186.735	-0.00636407
375.699	-186.876	0.00291814
375.723	-187.016	0.0140916
375.747	-187.157	0.0271738
375.772	-187.297	0.0421536
375.796	-187.438	0.0589904
375.82	-187.578	0.0776128
375.845	-187.719	0.0979194
375.869	-187.859	0.119778
375.894	-188	0.14303
375.918	-188.14	0.167487
375.942	-188.281	0.192938
375.967	-188.421	0.219151
375.991	-188.561	0.245877
376.015	-188.702	0.272853
376.04	-188.842	0.299808
376.064	-188.983	0.326466
376.089	-189.123	0.352552
376.113	-189.264	0.377795
376.137	-189.404	0.401935
376.162	-189.545	0.424723
376.186	-189.685	0.44593
376.21	-189.826	0.465347
376.235	-189.966	0.482787
376.259	-190.107	0.498091
376.284	-190.247	0.511124
376.308	-190.388	0.521783
376.332	-190.528	0.52999
376.357	-190.669	0.535698
376.381	-190.809	0.538886
376.405	-190.949	0.539561
376.43	-191.09	0.537754
376.454	-191.23	0.53352
376.479	-191.371	0.526934
376.503	-191.511	0.518091
376.527	-191.652	0.5071
376.552	-191.792	0.494087
376.576	-191.933	0.479186
376.6	-192.073	0.462543
376.625	-192.214	0.444309
376.649	-192.354	0.42464
376.674	-192.495	0.403695
376.698	-192.635	0.381635
376.722	-192.776	0.358617
376.747	-192.916	0.334802
376.771	-193.057	0.310343
376.796	-193.197	0.285391
376.82	-193.337	0.260094
376.844	-193.478	0.234593
376.869	-193.618	0.209026
376.893	-193.759	0.183523
376.917	-193.899	0.158212
376.942	-194.04	0.133213
376.966	-194.18	0.108642
376.99	-194.321	0.0846083
377.015	-194.461	0.0612177
377.039	-194.602	0.0385702
377.064	-194.742	0.0167606
377.088	-194.883	-0.00412097
377.112	-195.023	-0.0239903
377.137	-195.164	-0.0427683
377.161	-195.304	-0.0603823
377.185	-195.445	-0.0767655
377.21	-195.585	-0.0918587
377.234	-195.725	-0.10561
377.259	-195.866	-0.117975
377.283	-196.006	-0.12892
377.307	-196.147	-0.138419
377.332	-196.287	-0.146457
377.356	-196.428	-0.153029
377.38	-196.568	-0.158141
377.405	-196.709	-0.16181
377.429	-196.849	-0.164063
377.454	-196.99	-0.164938
377.478	-197.13	-0.164485
377.502	-197.271	-0.16276
377.527	-197.411	-0.159829
377.551	-197.552	-0.155767
377.575	-197.692	-0.150653
377.6	-197.833	-0.144571
377.624	-197.973	-0.137611
377.649	-198.113	-0.129862
377.673	-198.254	-0.121416
377.697	-198.394	-0.112363
377.722	-198.535	-0.102793
377.746	-198.675	-0.092792
377.77	-198.816	-0.0824429
377.795	-198.956	-0.0718245
377.819	-199.097	-0.0610111
377.844	-199.237	-0.0500723
377.868	-199.378	-0.0390726
377.892	-199.518	-0.0280725
377.917	-199.659	-0.0171278
377.941	-199.799	-0.0062906
377.965	-199.94	0.0043902
377.99	-200.08	0.0148684
378.014	-200.221	0.0250998
378.039	-200.361	0.0350421
378.063	-200.501	0.0446539
378.087	-200.642	0.0538949
378.112	-200.782	0.0627254
378.136	-200.923	0.0711061
378.16	-201.063	0.078999
378.185	-201.204	0.0863671
378.209	-201.344	0.0931749
378.234	-201.485	0.0993893
378.258	-201.625	0.104981
378.282	-201.766	0.109922
378.307	-201.906	0.114193
378.331	-202.047	0.117778
378.356	-202.187	0.120668
378.38	-202.328	0.12286
378.404	-202.468	0.124362
378.429	-202.609	0.12519
378.453	-202.749	0.125367
378.477	-202.889	0.124928
378.502	-203.03	0.123916
378.526	-203.17	0.122387
378.55	-203.311	0.120401
378.575	-203.451	0.118032
378.599	-203.592	0.115359
378.624	-203.732	0.11247
378.648	-203.873	0.10946
378.672	-204.013	0.106428
378.697	-204.154	0.103479
378.721	-204.294	0.100721
378.745	-204.435	0.0982644
378.77	-204.575	0.0962195
378.794	-204.716	0.0946963
378.819	-204.856	0.0938027
378.843	-204.996	0.0936425
378.867	-205.137	0.0943147
378.892	-205.277	0.095911
378.916	-205.418	0.0985152
378.94	-205.558	0.102201
378.965	-205.699	0.107029
378.989	-205.839	0.113048
379.014	-205.98	0.120292
379.038	-206.12	0.128777
379.062	-206.261	0.138501
379.087	-206.401	0.149445
379.111	-206.542	0.161568
379.135	-206.682	0.174806
379.16	-206.823	0.189077
379.184	-206.963	0.204274
379.209	-207.104	0.220271
379.233	-207.244	0.236918
379.257	-207.384	0.254048
379.282	-207.525	0.271475
379.306	-207.665	0.288997
379.33	-207.806	0.306398
379.355	-207.946	0.323454
379.379	-208.087	0.339934
379.404	-208.227	0.355602
379.428	-208.368	0.370227
379.452	-208.508	0.383582
379.477	-208.649	0.395448
379.501	-208.789	0.405625
342.977	1.69538	1
343.002	1.55513	0.993585
343.027	1.41487	0.981953
343.052	1.27462	0.965381
343.077	1.13437	0.944206
343.101	0.99411	0.918814
343.126	0.853856	0.889626
343.151	0.7136	0.857094
343.176	0.57335	0.821681
343.201	0.43309	0.783859
343.226	0.29284	0.744093
343.251	0.15258	0.702834
343.276	0.01233	0.660515
343.3	-0.12793	0.617538
343.325	-0.26818	0.574277
343.35	-0.40844	0.531069
343.375	-0.54869	0.488214
343.4	-0.68895	0.445974
343.425	-0.8292	0.404574
343.45	-0.96946	0.364203
343.474	-1.10971	0.325018
343.499	-1.24996	0.287143
343.524	-1.39022	0.250677
343.549	-1.53047	0.215696
343.574	-1.67073	0.182256
343.599	-1.81098	0.150398
343.624	-1.95124	0.12015
343.649	-2.09149	0.0915347
343.673	-2.23175	0.0645665
343.698	-2.372	0.0392592
343.723	-2.51226	0.0156255
343.748	-2.65251	-0.00632038
343.773	-2.79277	-0.0265618
343.798	-2.93302	-0.0450786
343.823	-3.07328	-0.0618475
343.847	-3.21353	-0.0768412
343.872	-3.35378	-0.0900301
343.897	-3.49404	-0.101382
343.922	-3.63429	-0.110862
343.947	-3.77455	-0.118437
343.972	-3.9148	-0.124075
343.997	-4.05506	-0.127745
344.022	-4.19531	-0.12942
344.046	-4.33557	-0.129079
344.071	-4.47582	-0.126708
344.096	-4.61608	-0.122299
344.121	-4.75633	-0.115855
344.146	-4.89659	-0.107388
344.171	-5.03684	-0.0969231
344.196	-5.1771	-0.0844957
344.22	-5.31735	-0.0701563
344.245	-5.4576	-0.0539689
344.27	-5.59786	-0.0360127
344.295	-5.73811	-0.0163822
344.32	-5.87837	0.00481183
344.345	-6.01862	0.027442
344.37	-6.15888	0.0513643
344.395	-6.29913	0.0764184
344.419	-6.43939	0.102427
344.444	-6.57964	0.129198
344.469	-6.7199	0.156523
344.494	-6.86015	0.184181
344.519	-7.00041	0.211937
344.544	-7.14066	0.239548
344.569	-7.28092	0.266762
344.593	-7.42117	0.293322
344.618	-7.56142	0.318967
344.643	-7.70168	0.343441
344.668	-7.84193	0.36649
344.693	-7.98219	0.38787
344.718	-8.12244	0.40735
344.743	-8.2627	0.424715
344.768	-8.403	0.439773
344.792	-8.5432	0.452353
344.817	-8.6835	0.462316
344.842	-8.8237	0.469552
344.867	-8.964	0.473982
344.892	-9.1042	0.475567
344.917	-9.2445	0.4743
344.942	-9.3847	0.470214
344.967	-9.525	0.463376
344.991	-9.6652	0.453891
345.016	-9.8055	0.441896
345.041	-9.9458	0.42756
345.066	-10.086	0.411081
345.091	-10.2263	0.39268
345.116	-10.3665	0.372601
345.141	-10.5068	0.351104
345.165	-10.647	0.328461
345.19	-10.7873	0.304952
345.215	-10.9275	0.28086
345.24	-11.0678	0.256468
345.265	-11.208	0.232053
345.29	-11.3483	0.207885
345.315	-11.4886	0.184219
345.34	-11.6288	0.1613
345.364	-11.7691	0.139352
345.389	-11.9093	0.118583
345.414	-12.0496	0.0991795
345.439	-12.1898	0.0813091
345.464	-12.3301	0.0651172
345.489	-12.4703	0.0507289
345.514	-12.6106	0.0382489
345.538	-12.7508	0.0277623
345.563	-12.8911	0.0193355
345.588	-13.0314	0.0130172
345.613	-13.1716	0.0088399
345.638	-13.3119	0.00682044
345.663	-13.4521	0.00696102
345.688	-13.5924	0.00925067
345.713	-13.7326	0.0136653
345.737	-13.8729	0.0201685
345.762	-14.0131	0.0287115
345.787	-14.1534	0.0392336
345.812	-14.2936	0.0516617
345.837	-14.4339	0.0659096
345.862	-14.5742	0.0818781
345.887	-14.7144	0.0994539
345.911	-14.8547	0.118509
345.936	-14.9949	0.1389
345.961	-15.1352	0.160468
345.986	-15.2754	0.183038
346.011	-15.4157	0.20642
346.036	-15.5559	0.230406
346.061	-15.6962	0.254776
346.086	-15.8365	0.279295
346.11	-15.9767	0.303716
346.135	-16.117	0.327784
346.16	-16.2572	0.351236
346.185	-16.3975	0.373807
346.21	-16.5377	0.395231
346.235	-16.678	0.415248
346.26	-16.8182	0.433605
346.284	-16.9585	0.450063
346.309	-17.0987	0.4644
346.334	-17.239	0.476415
346.359	-17.3793	0.485933
346.384	-17.5195	0.492807
346.409	-17.6598	0.496924
346.434	-17.8	0.498201
346.459	-17.9403	0.496597
346.483	-18.0805	0.492103
346.508	-18.2208	0.484749
346.533	-18.361	0.474602
346.558	-18.5013	0.461764
346.583	-18.6415	0.44637
346.608	-18.7818	0.428586
346.633	-18.9221	0.408606
346.658	-19.0623	0.386646
346.682	-19.2026	0.362944
346.707	-19.3428	0.337752
346.732	-19.4831	0.311335
346.757	-19.6233	0.283963
346.782	-19.7636	0.255911
346.807	-19.9038	0.227452
346.832	-20.0441	0.198856
346.856	-20.1843	0.170383
346.881	-20.3246	0.142285
346.906	-20.4649	0.114796
346.931	-20.6051	0.0881406
346.956	-20.7454	0.062521
346.981	-20.8856	0.0381231
347.006	-21.0259	0.0151122
347.031	-21.1661	-0.00636741
347.055	-21.3064	-0.0261921
347.08	-21.4466	-0.0442601
347.105	-21.5869	-0.0604919
347.13	-21.7271	-0.074829
347.155	-21.8674	-0.0872349
347.18	-22.0077	-0.0976938
347.205	-22.1479	-0.106211
347.229	-22.2882	-0.112811
347.254	-22.4284	-0.117538
347.279	-22.5687	-0.120455
347.304	-22.7089	-0.12164
347.329	-22.8492	-0.12119
347.354	-22.9894	-0.119212
347.379	-23.1297	-0.115831
347.404	-23.2699	-0.111178
347.428	-23.4102	-0.105396
347.453	-23.5505	-0.0986338
347.478	-23.6907	-0.0910455
347.503	-23.831	-0.0827877
347.528	-23.9712	-0.0740173
347.553	-24.1115	-0.0648897
347.578	-24.2517	-0.0555562
347.602	-24.392	-0.0461624
347.627	-24.5322	-0.0368458
347.652	-24.6725	-0.0277345
347.677	-24.8127	-0.0189458
347.702	-24.953	-0.0105847
347.727	-25.0933	-0.00274313
347.752	-25.2335	0.00450104
347.777	-25.3738	0.0110839
347.801	-25.514	0.0169559
347.826	-25.6543	0.0220814
347.851	-25.7945	0.0264391
347.876	-25.9348	0.0300198
347.901	-26.075	0.0328275
347.926	-26.2153	0.0348764
347.951	-26.3556	0.0361916
347.975	-26.4958	0.0368067
348	-26.6361	0.0367632
348.025	-26.7763	0.0361087
348.05	-26.9166	0.0348965
348.075	-27.0568	0.0331838
348.1	-27.1971	0.0310312
348.125	-27.3373	0.0285016
348.15	-27.4776	0.0256595
348.174	-27.6178	0.0225702
348.199	-27.7581	0.0193
348.224	-27.8984	0.0159152
348.249	-28.0386	0.0124825
348.274	-28.1789	0.00906877
348.299	-28.3191	0.00574101
348.324	-28.4594	0.00256649
348.349	-28.5996	-0.000386619
348.373	-28.7399	-0.00304991
348.398	-28.8801	-0.0053536
348.423	-29.0204	-0.00722703
348.448	-29.1606	-0.0085987
348.473	-29.3009	-0.00939593
348.498	-29.4412	-0.00954544
348.523	-29.5814	-0.00897364
348.547	-29.7217	-0.00760716
348.572	-29.8619	-0.00537392
348.597	-30.0022	-0.00220338
348.622	-30.1424	0.00197135
348.647	-30.2827	0.0072129
348.672	-30.4229	0.0135777
348.697	-30.5632	0.0211146
348.722	-30.7034	0.0298631
348.746	-30.8437	0.0398511
348.771	-30.984	0.0510939
348.796	-31.1242	0.0635913
348.821	-31.2645	0.077327
348.846	-31.4047	0.0922662
348.871	-31.545	0.108355
348.896	-31.6852	0.125518
348.92	-31.8255	0.14366
348.945	-31.9657	0.162663
348.97	-32.106	0.182388
348.995	-32.2462	0.202676
349.02	-32.3865	0.223349
349.045	-32.5268	0.24421
349.07	-32.667	0.265047
349.095	-32.8073	0.285636
349.119	-32.9475	0.305743
349.144	-33.0878	0.325129
349.169	-33.228	0.343553
349.194	-33.3683	0.360779
349.219	-33.5085	0.376575
349.244	-33.6488	0.390723
349.269	-33.789	0.40302
349.293	-33.9293	0.413284
349.318	-34.0696	0.421359
349.343	-34.2098	0.427113
349.368	-34.3501	0.430449
349.393	-34.4903	0.431299
349.418	-34.6306	0.429632
349.443	-34.7708	0.425453
349.468	-34.9111	0.418799
349.492	-35.0513	0.409745
349.517	-35.1916	0.398398
349.542	-35.3319	0.384896
349.567	-35.4721	0.369406
349.592	-35.6124	0.352119
349.617	-35.7526	0.333247
349.642	-35.8929	0.313021
349.666	-36.0331	0.291682
349.691	-36.1734	0.26948
349.716	-36.3136	0.246672
349.741	-36.4539	0.223509
349.766	-36.5941	0.200243
349.791	-36.7344	0.177114
349.816	-36.8747	0.154351
349.841	-37.0149	0.132169
349.865	-37.1552	0.110767
349.89	-37.2954	0.0903238
349.915	-37.4357	0.0709973
349.94	-37.5759	0.0529255
349.965	-37.7162	0.0362242
349.99	-37.8564	0.020988
350.015	-37.9967	0.00729041
350.039	-38.1369	-0.00481493
350.064	-38.2772	-0.0152931
350.089	-38.4175	-0.0241261
350.114	-38.5577	-0.0313117
350.139	-38.698	-0.0368602
350.164	-38.8382	-0.0407937
350.189	-38.9785	-0.043143
350.214	-39.1187	-0.0439459
350.238	-39.259	-0.0432446
350.263	-39.3992	-0.041084
350.288	-39.5395	-0.0375098
350.313	-39.6797	-0.0325663
350.338	-39.82	-0.0262954
350.363	-39.9603	-0.0187351
350.388	-40.1005	-0.00991811
350.413	-40.2408	0.000128309
350.437	-40.381	0.0113831
350.462	-40.5213	0.0238312
350.487	-40.6615	0.0374638
350.512	-40.8018	0.0522772
350.537	-40.942	0.0682717
350.562	-41.0823	0.0854513
350.587	-41.2225	0.10382
350.611	-41.3628	0.123383
350.636	-41.5031	0.144141
350.661	-41.6433	0.166089
350.686	-41.7836	0.189216
350.711	-41.9238	0.213497
350.736	-42.0641	0.238895
350.761	-42.2043	0.265355
350.786	-42.3446	0.292805
350.81	-42.4848	0.321147
350.835	-42.6251	0.350262
350.86	-42.7653	0.380002
350.885	-42.9056	0.410193
350.91	-43.0459	0.440634
350.935	-43.1861	0.471095
350.96	-43.3264	0.501317
350.984	-43.4666	0.531019
351.009	-43.6069	0.559896
351.034	-43.7471	0.587625
351.059	-43.8874	0.613871
351.084	-44.0276	0.638287
351.109	-44.1679	0.660527
351.134	-44.3081	0.68025
351.159	-44.4484	0.697128
351.183	-44.5887	0.710852
351.208	-44.7289	0.721145
351.233	-44.8692	0.727762
351.258	-45.0094	0.730505
351.283	-45.1497	0.729225
351.308	-45.2899	0.723828
351.333	-45.4302	0.714281
351.357	-45.5704	0.700614
351.382	-45.7107	0.682922
351.407	-45.851	0.661364
351.432	-45.9912	0.636161
351.457	-46.1315	0.607596
351.482	-46.2717	0.576003
351.507	-46.412	0.541765
351.532	-46.5522	0.505305
351.556	-46.6925	0.467077
351.581	-46.8327	0.427556
351.606	-46.973	0.387227
351.631	-47.1132	0.346576
351.656	-47.2535	0.306081
351.681	-47.3938	0.266199
351.706	-47.534	0.22736
351.731	-47.6743	0.189956
351.755	-47.8145	0.15434
351.78	-47.9548	0.120812
351.805	-48.095	0.0896231
351.83	-48.2353	0.060969
351.855	-48.3755	0.0349901
351.88	-48.5158	0.0117721
351.905	-48.656	-0.0086519
351.929	-48.7963	-0.0262982
351.954	-48.9366	-0.0412286
351.979	-49.0768	-0.0535446
352.004	-49.2171	-0.0633828
352.029	-49.3573	-0.0709079
352.054	-49.4976	-0.0763067
352.079	-49.6378	-0.0797825
352.104	-49.7781	-0.0815483
352.128	-49.9183	-0.0818216
352.153	-50.0586	-0.0808192
352.178	-50.1988	-0.0787527
352.203	-50.3391	-0.0758249
352.228	-50.4794	-0.072226
352.253	-50.6196	-0.0681319
352.278	-50.7599	-0.0637022
352.302	-50.9001	-0.0590791
352.327	-51.0404	-0.0543867
352.352	-51.1806	-0.0497316
352.377	-51.3209	-0.0452033
352.402	-51.4611	-0.0408747
352.427	-51.6014	-0.0368035
352.452	-51.7416	-0.0330339
352.477	-51.8819	-0.0295976
352.501	-52.0222	-0.0265158
352.526	-52.1624	-0.0238004
352.551	-52.3027	-0.0214555
352.576	-52.4429	-0.0194795
352.601	-52.5832	-0.0178651
352.626	-52.7234	-0.0166018
352.651	-52.8637	-0.0156757
352.675	-53.0039	-0.0150709
352.7	-53.1442	-0.0147703
352.725	-53.2844	-0.0147556
352.75	-53.4247	-0.0150076
352.775	-53.565	-0.015507
352.8	-53.7052	-0.016234
352.825	-53.8455	-0.0171687
352.85	-53.9857	-0.0182909
352.874	-54.126	-0.01958
352.899	-54.2662	-0.0210153
352.924	-54.4065	-0.0225755
352.949	-54.5467	-0.0242392
352.974	-54.687	-0.0259849
352.999	-54.8272	-0.0277904
353.024	-54.9675	-0.0296343
353.048	-55.1078	-0.0314948
353.073	-55.248	-0.033351
353.098	-55.3883	-0.0351832
353.123	-55.5285	-0.0369726
353.148	-55.6688	-0.0387027
353.173	-55.809	-0.0403594
353.198	-55.9493	-0.0419311
353.223	-56.0895	-0.0434103
353.247	-56.2298	-0.0447931
353.272	-56.3701	-0.0460804
353.297	-56.5103	-0.0472776
353.322	-56.6506	-0.0483959
353.347	-56.7908	-0.0494515
353.372	-56.9311	-0.0504667
353.397	-57.0713	-0.0514691
353.421	-57.2116	-0.052492
353.446	-57.3518	-0.0535737
353.471	-57.4921	-0.0547573
353.496	-57.6323	-0.0560898
353.521	-57.7726	-0.0576216
353.546	-57.9129	-0.059405
353.571	-58.0531	-0.0614935
353.596	-58.1934	-0.0639404
353.62	-58.3336	-0.0667972
353.645	-58.4739	-0.0701121
353.67	-58.6141	-0.0739289
353.695	-58.7544	-0.0782845
353.72	-58.8946	-0.0832084
353.745	-59.0349	-0.0887203
353.77	-59.1751	-0.0948287
353.794	-59.3154	-0.10153
353.819	-59.4557	-0.108809
353.844	-59.5959	-0.116633
353.869	-59.7362	-0.124958
353.894	-59.8764	-0.133725
353.919	-60.0167	-0.142857
353.944	-60.1569	-0.152267
353.969	-60.2972	-0.161855
353.993	-60.4374	-0.171506
354.018	-60.5777	-0.181099
354.043	-60.7179	-0.190503
354.068	-60.8582	-0.199585
354.093	-60.9985	-0.208205
354.118	-61.1387	-0.21623
354.143	-61.279	-0.223525
354.167	-61.4192	-0.229965
354.192	-61.5595	-0.235435
354.217	-61.6997	-0.239832
354.242	-61.84	-0.243068
354.267	-61.9802	-0.245075
354.292	-62.1205	-0.245803
354.317	-62.2607	-0.245222
354.342	-62.401	-0.243327
354.366	-62.5413	-0.240133
354.391	-62.6815	-0.235677
354.416	-62.8218	-0.230018
354.441	-62.962	-0.223234
354.466	-63.1023	-0.215422
354.491	-63.2425	-0.206692
354.516	-63.3828	-0.197168
354.541	-63.523	-0.186985
354.565	-63.6633	-0.176284
354.59	-63.8035	-0.165208
354.615	-63.9438	-0.153904
354.64	-64.0841	-0.142513
354.665	-64.2243	-0.131173
354.69	-64.3646	-0.120015
354.715	-64.5048	-0.109158
354.739	-64.6451	-0.0987105
354.764	-64.7853	-0.0887694
354.789	-64.9256	-0.079417
354.814	-65.0658	-0.070722
354.839	-65.2061	-0.0627385
354.864	-65.3464	-0.0555073
354.889	-65.4866	-0.0490557
354.914	-65.6269	-0.0433989
354.938	-65.7671	-0.0385401
354.963	-65.9074	-0.0344729
354.988	-66.0476	-0.0311814
355.013	-66.1879	-0.0286422
355.038	-66.3281	-0.0268251
355.063	-66.4684	-0.0256944
355.088	-66.6086	-0.0252099
355.113	-66.7489	-0.0253281
355.137	-66.8892	-0.0260022
355.162	-67.0294	-0.0271833
355.187	-67.1697	-0.0288207
355.212	-67.3099	-0.0308621
355.237	-67.4502	-0.0332539
355.262	-67.5904	-0.0359412
355.287	-67.7307	-0.0388681
355.311	-67.8709	-0.0419773
[truncated: 435,082+ more rows]

## Sheet: Figure 2a-wiggles
Figure 2a
Depth-migrated wiggles
Distance/km	Depth/km (postive represents above sea level)	Amplitude
20.7125	1.27609	0.412378
20.7125	0.891998	0.435832
20.7125	0.506289	0.447919
20.7125	0.122117	0.447636
20.7125	-0.262055	0.435006
20.7125	-0.646227	0.411073
20.7125	-1.0304	0.377779
20.7125	-1.41457	0.337701
20.7125	-1.79874	0.293742
20.7125	-2.18292	0.24879
20.7125	-2.56709	0.205417
20.7125	-2.95126	0.165664
20.7125	-3.33543	0.130922
20.7125	-3.7196	0.101917
20.7125	-4.10378	0.078786
20.7125	-4.48795	0.061209
20.7125	-4.87212	0.048563
20.7125	-5.25629	0.040082
20.7125	-5.64046	0.034978
20.7125	-6.02464	0.03253
20.7125	-6.39344	0.032133
20.7125	-6.77761	0.033301
20.7125	-7.16179	0.035657
20.7125	-7.54596	0.038897
20.7125	-7.93013	0.042762
20.7125	-8.3143	0.047001
20.7125	-8.69847	0.05136
20.7125	-9.08265	0.055571
20.7125	-9.46682	0.059357
20.7125	-9.85099	0.062444
20.7125	-10.2352	0.064581
20.7125	-10.6193	0.065555
20.7125	-11.0035	0.06521
20.7125	-11.3877	0.063455
20.7125	-11.7719	0.060272
20.7125	-12.156	0.055713
20.7125	-12.5402	0.049894
20.7125	-12.9244	0.042988
20.7125	-13.3085	0.035206
20.7125	-13.6927	0.026783
20.7125	-14.0769	0.017966
20.7125	-14.4611	0.008999
20.7125	-14.8452	0.000107
20.7125	-15.2294	-0.008508
20.7125	-15.6136	-0.016676
20.7125	-15.9977	-0.024265
20.7125	-16.3819	-0.031179
20.7125	-16.7661	-0.037357
20.7125	-17.1503	-0.042772
20.7125	-17.5344	-0.047427
20.7125	-17.9186	-0.051345
20.7125	-18.3028	-0.05457
20.7125	-18.6869	-0.057154
20.7125	-19.0711	-0.059155
20.7125	-19.4553	-0.060625
20.7125	-19.8395	-0.061606
20.7125	-20.2236	-0.06212
20.7125	-20.6078	-0.06217
20.7125	-20.992	-0.061735
20.7125	-21.3762	-0.060782
20.7125	-21.7603	-0.05927
20.7125	-22.1445	-0.057167
20.7125	-22.5287	-0.054459
20.7125	-22.9128	-0.051167
20.7125	-23.297	-0.047345
20.7125	-23.6812	-0.043084
20.7125	-24.0654	-0.038502
20.7125	-24.4495	-0.033729
20.7125	-24.8337	-0.028894
20.7125	-25.2179	-0.024107
20.7125	-25.602	-0.019449
20.7125	-25.9862	-0.014964
20.7125	-26.3704	-0.01066
20.7125	-26.7546	-0.006514
20.7125	-27.1387	-0.002483
20.7125	-27.5229	0.001489
20.7125	-27.9071	0.005457
20.7125	-28.2913	0.009471
20.7125	-28.6754	0.013564
20.7125	-29.0596	0.017755
20.7125	-29.4438	0.022044
20.7125	-29.8279	0.026414
20.7125	-30.2121	0.030831
20.7125	-30.5963	0.035246
20.7125	-30.9805	0.039593
20.7125	-31.3646	0.043794
20.7125	-31.7488	0.047757
20.7125	-32.133	0.051381
20.7125	-32.5171	0.054564
20.7125	-32.9013	0.057207
20.7125	-33.2855	0.059226
20.7125	-33.6697	0.060558
20.7125	-34.0538	0.061169
20.7125	-34.438	0.061056
20.7125	-34.8222	0.060243
20.7125	-35.2064	0.05878
20.7125	-35.5905	0.056732
20.7125	-35.9747	0.054173
20.7125	-36.3589	0.051183
20.7125	-36.743	0.047837
20.7125	-37.1272	0.044214
20.7125	-37.5114	0.040392
20.7125	-37.8956	0.036454
20.7125	-38.2797	0.03249
20.7125	-38.6639	0.028599
20.7125	-39.0481	0.024881
20.7125	-39.4322	0.021438
20.7125	-39.8164	0.018361
20.7125	-40.2006	0.015724
20.7125	-40.5848	0.013578
20.7125	-40.9689	0.011942
20.7125	-41.3531	0.010802
20.7125	-41.7373	0.010112
20.7125	-42.1214	0.009799
20.7125	-42.5056	0.009764
20.7125	-42.8898	0.009893
20.7125	-43.274	0.010061
20.7125	-43.6581	0.010145
20.7125	-44.0423	0.010024
20.7125	-44.4265	0.009592
20.7125	-44.8107	0.008762
20.7125	-45.1948	0.007468
20.7125	-45.579	0.005673
20.7125	-45.9632	0.003368
20.7125	-46.3473	0.000579
20.7125	-46.7315	-0.002636
20.7125	-47.1157	-0.006187
20.7125	-47.4999	-0.009956
20.7125	-47.884	-0.013799
20.7125	-48.2682	-0.017555
20.7125	-48.6524	-0.021055
20.7125	-49.0365	-0.024132
20.7125	-49.4207	-0.026634
20.7125	-49.8049	-0.028431
20.7125	-50.1891	-0.029431
20.7125	-50.5732	-0.02958
20.7125	-50.9574	-0.028868
20.7125	-51.3416	-0.027328
20.7125	-51.7258	-0.025032
20.7125	-52.1099	-0.022079
20.7125	-52.4941	-0.018593
20.7125	-52.8783	-0.014705
20.7125	-53.2624	-0.010553
20.7125	-53.6466	-0.00627
20.7125	-54.0308	-0.001989
20.7125	-54.415	0.002162
20.7125	-54.7991	0.006062
20.7125	-55.1833	0.009587
20.7125	-55.5675	0.012623
20.7125	-55.9516	0.015056
20.7125	-56.3358	0.016789
20.7125	-56.72	0.017737
20.7125	-57.1042	0.017843
20.7125	-57.4883	0.017082
20.7125	-57.8725	0.015467
20.7125	-58.2567	0.013055
20.7125	-58.6408	0.009947
20.7125	-59.025	0.006286
20.7125	-59.4092	0.002248
20.7125	-59.7934	-0.001971
20.7125	-60.1775	-0.006163
20.7125	-60.5617	-0.010133
20.7125	-60.9459	-0.013706
20.7125	-61.3301	-0.016746
20.7125	-61.7142	-0.019162
20.7125	-62.0984	-0.020911
20.7125	-62.4826	-0.022002
20.7125	-62.8667	-0.022483
20.7125	-63.2509	-0.02244
20.7125	-63.6351	-0.021983
20.7125	-64.0193	-0.021232
20.7125	-64.4034	-0.020311
20.7125	-64.7876	-0.019336
20.7125	-65.1718	-0.018406
20.7125	-65.5559	-0.017601
20.7125	-65.9401	-0.016975
20.7125	-66.3243	-0.016558
20.7125	-66.7085	-0.016356
20.7125	-67.0926	-0.016352
20.7125	-67.4768	-0.016515
20.7125	-67.861	-0.016798
20.7125	-68.2452	-0.017145
20.7125	-68.6293	-0.017499
20.7125	-69.0135	-0.017801
20.7125	-69.3977	-0.017997
20.7125	-69.7818	-0.018042
20.7125	-70.166	-0.017903
20.7125	-70.5502	-0.017561
20.7125	-70.9344	-0.017012
20.7125	-71.3185	-0.016268
20.7125	-71.7027	-0.015355
20.7125	-72.0869	-0.014314
20.7125	-72.471	-0.013191
20.7125	-72.8552	-0.012035
20.7125	-73.2394	-0.010894
20.7125	-73.6236	-0.009805
20.7125	-74.0077	-0.008796
20.7125	-74.3919	-0.007878
20.7125	-74.7761	-0.007047
20.7125	-75.1602	-0.006288
20.7125	-75.5444	-0.005573
20.7125	-76.3128	-0.004873
20.7125	-76.3128	-0.004158
20.7125	-77.0811	-0.003401
20.7125	-77.0811	-0.002581
20.7125	-77.8495	-0.001686
20.7125	-77.8495	-0.000705
20.7125	-78.6178	0.000372
20.7125	-78.6178	0.001557
20.7125	-79.3861	0.002866
20.7125	-79.3861	0.004323
20.7125	-80.1545	0.00595
20.7125	-80.1545	0.007766
20.7125	-80.9228	0.009775
20.7125	-80.9228	0.011961
20.7125	-81.6912	0.014274
20.7125	-81.6912	0.016633
20.7125	-82.4595	0.018923
20.7125	-82.4595	0.021003
20.7125	-83.2279	0.022722
20.7125	-83.2279	0.023933
20.7125	-83.9962	0.024514
20.7125	-83.9962	0.024381
20.7125	-84.7646	0.023503
20.7125	-84.7646	0.021901
20.7125	-85.5329	0.019651
20.7125	-85.5329	0.016866
20.7125	-86.3012	0.01369
20.7125	-86.3012	0.010274
20.7125	-87.0696	0.006762
20.7125	-87.0696	0.003281
20.7125	-87.8379	-7.1e-05
20.7125	-87.8379	-0.003227
20.7125	-88.6063	-0.006154
20.7125	-88.6063	-0.008844
20.7125	-89.3746	-0.011316
20.7125	-89.3746	-0.013601
20.7125	-90.143	-0.015742
20.7125	-90.143	-0.017781
20.7125	-90.9113	-0.01975
20.7125	-90.9113	-0.021672
20.7125	-91.6797	-0.023547
20.7125	-91.6797	-0.025356
20.7125	-92.448	-0.027061
20.7125	-92.448	-0.028607
20.7125	-93.2163	-0.029934
20.7125	-93.2163	-0.030981
20.7125	-93.9847	-0.031694
20.7125	-93.9847	-0.032037
20.7125	-94.753	-0.031993
20.7125	-94.753	-0.031561
20.7125	-95.5214	-0.030759
20.7125	-95.5214	-0.029617
20.7125	-96.2897	-0.028173
20.7125	-96.2897	-0.026467
20.7125	-97.0581	-0.024541
20.7125	-97.0581	-0.022438
20.7125	-97.8264	-0.020201
20.7125	-97.8264	-0.017874
20.7125	-98.5947	-0.015506
20.7125	-98.5947	-0.013146
20.7125	-99.3631	-0.010848
20.7125	-99.3631	-0.008664
20.7125	-100.131	-0.006643
20.7125	-100.131	-0.004827
20.7125	-100.9	-0.003248
20.7125	-100.9	-0.001923
20.7125	-101.668	-0.000854
20.7125	-101.668	-2.6e-05
20.7125	-102.436	0.000588
20.7125	-102.436	0.001029
20.7125	-103.205	0.001342
20.7125	-103.205	0.001574
20.7125	-103.973	0.001768
20.7125	-103.973	0.001957
20.7125	-104.742	0.002161
20.7125	-104.742	0.00239
20.7125	-105.51	0.00264
20.7125	-105.51	0.002903
20.7125	-106.278	0.003163
20.7125	-106.278	0.003409
20.7125	-107.047	0.003629
20.7125	-107.047	0.003821
20.7125	-107.815	0.003988
20.7125	-107.815	0.004138
20.7125	-108.583	0.004285
20.7125	-108.583	0.004443
20.7125	-109.352	0.004629
20.7125	-109.352	0.004861
20.7125	-110.12	0.005157
20.7125	-110.12	0.005538
20.7125	-110.888	0.006027
20.7125	-110.888	0.00665
20.7125	-111.657	0.007435
20.7125	-111.657	0.008411
20.7125	-112.425	0.009603
20.7125	-112.425	0.011029
20.7125	-113.193	0.012694
20.7125	-113.193	0.014584
20.7125	-113.962	0.016672
20.7125	-113.962	0.018909
20.7125	-114.73	0.021235
20.7125	-114.73	0.02358
20.7125	-115.498	0.025872
20.7125	-115.498	0.028045
20.7125	-116.267	0.03004
20.7125	-116.267	0.031811
20.7125	-117.035	0.033325
20.7125	-117.035	0.034558
20.7125	-117.803	0.035494
20.7125	-117.803	0.036123
20.7125	-118.572	0.036439
20.7125	-118.572	0.036438
20.7125	-119.34	0.036121
20.7125	-119.34	0.035492
20.7125	-120.108	0.034565
20.7125	-120.108	0.033358
20.7125	-120.877	0.031902
20.7125	-120.877	0.030234
20.7125	-121.645	0.0284
20.7125	-121.645	0.026457
20.7125	-122.413	0.024469
20.7125	-122.413	0.022505
20.7125	-123.182	0.020643
20.7125	-123.182	0.018964
20.7125	-123.95	0.017548
20.7125	-123.95	0.016473
20.7125	-124.718	0.015808
20.7125	-124.718	0.015607
20.7125	-125.487	0.015904
20.7125	-125.487	0.016708
20.7125	-126.255	0.017995
20.7125	-126.255	0.019714
20.7125	-127.023	0.021779
20.7125	-127.023	0.024078
20.7125	-127.792	0.026477
20.7125	-127.792	0.028828
20.7125	-128.56	0.030982
20.7125	-128.56	0.032795
20.7125	-129.329	0.034143
20.7125	-129.329	0.03493
20.7125	-130.097	0.035091
20.7125	-130.097	0.034599
20.7125	-130.865	0.033462
20.7125	-130.865	0.031719
20.7125	-131.634	0.029432
20.7125	-131.634	0.026677
20.7125	-132.402	0.023536
20.7125	-132.402	0.020086
20.7125	-133.17	0.016393
20.7125	-133.17	0.012508
20.7125	-133.939	0.008473
20.7125	-133.939	0.004316
20.7125	-134.707	6.6e-05
20.7125	-134.707	-0.004243
20.7125	-135.475	-0.008564
20.7125	-135.475	-0.012832
20.7125	-136.244	-0.016962
20.7125	-136.244	-0.020849
20.7125	-137.012	-0.024376
20.7125	-137.012	-0.027421
20.7125	-137.78	-0.02987
20.7125	-137.78	-0.031626
20.7125	-138.549	-0.032623
20.7125	-138.549	-0.032832
20.7125	-139.317	-0.032272
20.7125	-139.317	-0.031003
20.7125	-140.085	-0.02913
20.7125	-140.085	-0.026789
20.7125	-140.854	-0.024137
20.7125	-140.854	-0.021337
20.7125	-141.622	-0.018546
20.7125	-141.622	-0.015901
20.7125	-142.39	-0.013512
20.7125	-142.39	-0.011462
20.7125	-143.159	-0.0098
20.7125	-143.159	-0.00855
20.7125	-143.927	-0.007717
20.7125	-143.927	-0.00729
20.7125	-144.695	-0.007247
20.7125	-144.695	-0.007563
20.7125	-145.464	-0.008209
20.7125	-145.464	-0.009156
20.7125	-146.232	-0.010371
20.7125	-146.232	-0.011818
20.7125	-147	-0.013459
20.7125	-147	-0.015247
20.7125	-147.769	-0.01713
20.7125	-147.769	-0.01905
20.7125	-148.537	-0.020944
20.7125	-148.537	-0.022747
20.7125	-149.305	-0.024394
20.7125	-149.305	-0.025828
20.7125	-150.074	-0.026997
20.7125	-150.074	-0.027863
20.7125	-150.842	-0.028396
20.7125	-150.842	-0.02858
20.7125	-151.61	-0.02841
20.7125	-151.61	-0.027889
20.7125	-152.379	-0.02703
20.7125	-152.379	-0.025853
20.7125	-153.147	-0.024387
20.7125	-153.147	-0.022668
20.7125	-153.916	-0.02074
20.7125	-153.916	-0.018653
20.7125	-154.684	-0.016467
20.7125	-154.684	-0.014244
20.7125	-155.452	-0.012051
20.7125	-155.452	-0.009954
20.7125	-156.221	-0.00802
20.7125	-156.221	-0.006308
20.7125	-156.989	-0.004871
20.7125	-156.989	-0.003747
20.7125	-157.757	-0.002958
20.7125	-157.757	-0.002505
20.7125	-158.526	-0.002369
20.7125	-158.526	-0.00251
20.7125	-159.294	-0.002871
20.7125	-159.294	-0.003384
20.7125	-160.062	-0.003979
20.7125	-160.062	-0.00459
20.7125	-160.831	-0.005165
20.7125	-160.831	-0.005666
20.7125	-161.599	-0.006078
20.7125	-161.599	-0.006399
20.7125	-162.367	-0.006647
20.7125	-162.367	-0.006843
20.7125	-163.136	-0.007013
20.7125	-163.136	-0.007179
20.7125	-163.904	-0.007355
20.7125	-163.904	-0.007546
20.7125	-164.672	-0.007747
20.7125	-164.672	-0.007951
20.7125	-165.441	-0.008144
20.7125	-165.441	-0.008316
20.7125	-166.209	-0.008459
20.7125	-166.209	-0.008573
20.7125	-166.977	-0.00866
20.7125	-166.977	-0.008724
20.7125	-167.746	-0.008769
20.7125	-167.746	-0.008792
20.7125	-168.514	-0.008782
20.7125	-168.514	-0.008717
20.7125	-169.282	-0.008565
20.7125	-169.282	-0.008285
20.7125	-170.051	-0.007838
20.7125	-170.051	-0.007185
20.7125	-170.819	-0.006303
20.7125	-170.819	-0.005185
20.7125	-171.587	-0.003845
20.7125	-171.587	-0.002325
20.7125	-172.356	-0.000687
20.7125	-172.356	0.000989
20.7125	-173.124	0.002612
20.7125	-173.124	0.004088
20.7125	-173.892	0.005332
20.7125	-173.892	0.006277
20.7125	-174.661	0.006877
20.7125	-174.661	0.007114
20.7125	-175.429	0.006997
20.7125	-175.429	0.006562
20.7125	-176.198	0.005861
20.7125	-176.198	0.004964
20.7125	-176.966	0.003943
20.7125	-176.966	0.002868
20.7125	-177.734	0.001802
20.7125	-177.734	0.000797
20.7125	-178.503	-0.000113
20.7125	-178.503	-0.000907
20.7125	-179.271	-0.001576
20.7125	-179.271	-0.002122
20.7125	-180.039	-0.002553
20.7125	-180.039	-0.002876
20.7125	-180.808	-0.003099
20.7125	-180.808	-0.003224
20.7125	-181.576	-0.003248
20.7125	-181.576	-0.003166
20.7125	-182.344	-0.00297
20.7125	-182.344	-0.002657
20.7125	-183.113	-0.002227
20.7125	-183.113	-0.001689
20.7125	-183.881	-0.00106
20.7125	-183.881	-0.000368
20.7125	-184.649	0.000355
20.7125	-184.649	0.00107
20.7125	-185.418	0.001741
20.7125	-185.418	0.002333
20.7125	-186.186	0.002819
20.7125	-186.186	0.003181
20.7125	-186.954	0.00341
20.7125	-186.954	0.00351
20.7125	-187.723	0.003494
20.7125	-187.723	0.003383
20.7125	-188.491	0.003206
20.7125	-188.491	0.002995
20.7125	-189.259	0.002783
20.7125	-189.259	0.0026
20.7125	-190.028	0.002473
20.7125	-190.028	0.002421
20.7125	-190.796	0.002452
20.7125	-190.796	0.002567
20.7125	-191.564	0.002751
20.7125	-191.564	0.002978
20.7125	-192.333	0.003211
20.7125	-192.333	0.003404
20.7125	-193.101	0.003505
20.7125	-193.101	0.003462
20.7125	-193.869	0.003232
20.7125	-193.869	0.002784
20.7125	-194.638	0.002108
20.7125	-194.638	0.001214
20.7125	-195.406	0.000139
20.7125	-195.406	-0.001059
20.7125	-196.174	-0.002309
20.7125	-196.174	-0.003532
20.7125	-196.943	-0.004652
20.7125	-196.943	-0.005603
20.7125	-197.711	-0.006337
20.7125	-197.711	-0.006826
20.7125	-198.479	-0.007062
20.7125	-198.479	-0.007056
20.7125	-199.248	-0.006832
20.7125	-199.248	-0.006421
20.7125	-200.016	-0.005856
20.7125	-200.016	-0.005169
20.7125	-200.785	-0.004386
20.7125	-200.785	-0.003528
20.7125	-201.553	-0.002611
20.7125	-201.553	-0.001646
20.7125	-202.321	-0.000643
20.7125	-202.321	0.000394
20.7125	-203.09	0.001458
20.7125	-203.09	0.002545
20.7125	-203.858	0.00365
20.7125	-203.858	0.004773
20.7125	-204.626	0.005916
20.7125	-204.626	0.007084
20.7125	-205.395	0.008283
20.7125	-205.395	0.009522
20.7125	-206.163	0.01081
20.7125	-206.163	0.012149
20.7125	-206.931	0.013537
20.7125	-206.931	0.01496
20.7125	-207.7	0.016397
20.7125	-207.7	0.017813
20.7125	-208.468	0.019169
20.7125	-208.468	0.020417
20.7125	-209.236	0.021513
20.7125	-209.236	0.022414
20.7125	-210.005	0.02309
20.7125	-210.005	0.023517
20.7125	-210.773	0.023687
20.7125	-210.773	0.0236
20.7125	-211.541	0.023264
20.7125	-211.541	0.022691
20.7125	-212.31	0.021894
20.7125	-212.31	0.020885
20.7125	-213.078	0.01967
20.7125	-213.078	0.018252
20.7125	-213.846	0.016632
20.7125	-213.846	0.01481
20.7125	-214.615	0.012792
20.7125	-214.615	0.010591
20.7125	-215.383	0.008229
20.7125	-215.383	0.005745
20.7125	-216.151	0.003188
20.7125	-216.151	0.000623
20.7125	-216.92	-0.00188
20.7125	-216.92	-0.004244
20.7125	-217.688	-0.006398
20.7125	-217.688	-0.00828
20.7125	-218.456	-0.009846
20.7125	-218.456	-0.011067
20.7125	-219.225	-0.011943
20.7125	-219.225	-0.012486
20.7125	-219.993	-0.012726
20.7125	-219.993	-0.012702
20.7125	-220.761	-0.012455
20.7125	-220.761	-0.012025
20.7125	-221.53	-0.011444
20.7125	-221.53	-0.01074
20.7125	-222.298	-0.009935
20.7125	-222.298	-0.009049
20.7125	-223.067	-0.008105
20.7125	-223.067	-0.007125
20.7125	-223.835	-0.006139
20.7125	-223.835	-0.005174
20.7125	-224.603	-0.004262
20.7125	-224.603	-0.003426
20.7125	-225.372	-0.002688
20.7125	-225.372	-0.002058
20.7125	-226.14	-0.001543
20.7125	-226.14	-0.001139
20.7125	-226.908	-0.000839
20.7125	-226.908	-0.000634
20.7125	-227.677	-0.000509
20.7125	-227.677	-0.000451
20.7125	-228.445	-0.000446
20.7125	-228.445	-0.000479
>
26.4378	0.336681	0.41966
26.4378	-0.0206479	0.407343
26.4378	-0.376548	0.38618
26.4378	-0.733877	0.358028
26.4378	-1.09121	0.325184
26.4378	-1.44854	0.290111
26.4378	-1.80586	0.255157
26.4378	-2.16319	0.222314
26.4378	-2.52052	0.193042
26.4378	-2.87785	0.168187
26.4378	-3.23518	0.147983
26.4378	-3.59251	0.13213
26.4378	-3.94984	0.119923
26.4378	-4.30717	0.110416
26.4378	-4.6645	0.102579
26.4378	-5.02183	0.095436
26.4378	-5.37916	0.08817
26.4378	-5.73649	0.08019
26.4378	-6.09381	0.07116
26.4378	-6.45114	0.060986
26.4378	-6.82991	0.049792
26.4378	-7.18724	0.037866
26.4378	-7.54457	0.025613
26.4378	-7.9019	0.013495
26.4378	-8.25923	0.001987
26.4378	-8.61656	-0.008466
26.4378	-8.97389	-0.01748
26.4378	-9.33122	-0.024758
26.4378	-9.68855	-0.030101
26.4378	-10.0459	-0.033415
26.4378	-10.4032	-0.034712
26.4378	-10.7605	-0.034094
26.4378	-11.1179	-0.031738
26.4378	-11.4752	-0.027876
26.4378	-11.8325	-0.022766
26.4378	-12.1899	-0.016672
26.4378	-12.5472	-0.009844
26.4378	-12.9045	-0.002505
26.4378	-13.2618	0.00515
26.4378	-13.6192	0.012952
26.4378	-13.9765	0.020749
26.4378	-14.3338	0.028387
26.4378	-14.6912	0.035708
26.4378	-15.0485	0.042535
26.4378	-15.4058	0.048675
26.4378	-15.7631	0.053929
26.4378	-16.1205	0.058108
26.4378	-16.4778	0.061052
26.4378	-16.8351	0.062654
26.4378	-17.1925	0.062874
26.4378	-17.5498	0.06175
26.4378	-17.9071	0.059392
26.4378	-18.2644	0.055973
26.4378	-18.6218	0.051701
26.4378	-18.9791	0.0468
26.4378	-19.3364	0.041476
26.4378	-19.6938	0.0359
26.4378	-20.0511	0.030194
26.4378	-20.4084	0.024428
26.4378	-20.7658	0.018625
26.4378	-21.1231	0.012779
26.4378	-21.4804	0.006869
26.4378	-21.8377	0.000884
26.4378	-22.1951	-0.005166
26.4378	-22.5524	-0.01123
26.4378	-22.9097	-0.017213
26.4378	-23.2671	-0.022976
26.4378	-23.6244	-0.028342
26.4378	-23.9817	-0.033113
26.4378	-24.339	-0.037086
26.4378	-24.6964	-0.040073
26.4378	-25.0537	-0.041929
26.4378	-25.411	-0.042563
26.4378	-25.7684	-0.041953
26.4378	-26.1257	-0.040151
26.4378	-26.483	-0.03727
26.4378	-26.8403	-0.03348
26.4378	-27.1977	-0.028978
26.4378	-27.555	-0.023973
26.4378	-27.9123	-0.01866
26.4378	-28.2697	-0.013206
26.4378	-28.627	-0.007733
26.4378	-28.9843	-0.002319
26.4378	-29.3417	0.003002
26.4378	-29.699	0.008235
26.4378	-30.0563	0.013413
26.4378	-30.4136	0.018587
26.4378	-30.771	0.023817
26.4378	-31.1283	0.029164
26.4378	-31.4856	0.034681
26.4378	-31.843	0.040407
26.4378	-32.2003	0.04636
26.4378	-32.5576	0.052519
26.4378	-32.9149	0.058822
26.4378	-33.2723	0.065149
26.4378	-33.6296	0.071318
26.4378	-33.9869	0.077084
26.4378	-34.3443	0.082157
26.4378	-34.7016	0.086218
26.4378	-35.0589	0.088955
26.4378	-35.4162	0.090099
26.4378	-35.7736	0.089468
26.4378	-36.1309	0.086987
26.4378	-36.4882	0.082717
26.4378	-36.8456	0.076848
26.4378	-37.2029	0.069685
26.4378	-37.5602	0.061618
26.4378	-37.9176	0.053078
26.4378	-38.2749	0.044493
26.4378	-38.6322	0.03625
26.4378	-38.9895	0.028663
26.4378	-39.3469	0.021953
26.4378	-39.7042	0.016245
26.4378	-40.0615	0.011575
26.4378	-40.4189	0.007901
26.4378	-40.7762	0.005133
26.4378	-41.1335	0.003144
26.4378	-41.4908	0.001798
26.4378	-41.8482	0.000961
26.4378	-42.2055	0.000515
26.4378	-42.5628	0.000362
26.4378	-42.9202	0.000425
26.4378	-43.2775	0.000647
26.4378	-43.6348	0.000985
26.4378	-43.9921	0.001405
26.4378	-44.3495	0.001881
26.4378	-44.7068	0.002383
26.4378	-45.0641	0.002882
26.4378	-45.4215	0.003348
26.4378	-45.7788	0.003747
26.4378	-46.1361	0.004052
26.4378	-46.4935	0.004241
26.4378	-46.8508	0.0043
26.4378	-47.2081	0.004228
26.4378	-47.5654	0.004035
26.4378	-47.9228	0.003743
26.4378	-48.2801	0.003378
26.4378	-48.6374	0.002972
26.4378	-48.9948	0.002554
26.4378	-49.3521	0.002146
26.4378	-49.7094	0.001766
26.4378	-50.0667	0.001419
26.4378	-50.4241	0.001106
26.4378	-50.7814	0.000821
26.4378	-51.1387	0.000555
26.4378	-51.4961	0.000302
26.4378	-51.8534	5.7e-05
26.4378	-52.2107	-0.000179
26.4378	-52.568	-0.000401
26.4378	-52.9254	-0.0006
26.4378	-53.2827	-0.000768
26.4378	-53.64	-0.000893
26.4378	-53.9974	-0.00097
26.4378	-54.3547	-0.000998
26.4378	-54.712	-0.000982
26.4378	-55.0694	-0.000939
26.4378	-55.4267	-0.000897
26.4378	-55.784	-0.000894
26.4378	-56.1413	-0.000982
26.4378	-56.4987	-0.001222
26.4378	-56.856	-0.001682
26.4378	-57.2133	-0.002431
26.4378	-57.5707	-0.003535
26.4378	-57.928	-0.005046
26.4378	-58.2853	-0.007
26.4378	-58.6426	-0.009405
26.4378	-59	-0.012244
26.4378	-59.3573	-0.015462
26.4378	-59.7146	-0.018973
26.4378	-60.072	-0.022656
26.4378	-60.4293	-0.026365
26.4378	-60.7866	-0.029933
26.4378	-61.1439	-0.033188
26.4378	-61.5013	-0.035966
26.4378	-61.8586	-0.038127
26.4378	-62.2159	-0.03957
26.4378	-62.5733	-0.040245
26.4378	-62.9306	-0.040162
26.4378	-63.2879	-0.039384
26.4378	-63.6453	-0.038024
26.4378	-64.0026	-0.036226
26.4378	-64.3599	-0.034147
26.4378	-64.7172	-0.031938
26.4378	-65.0746	-0.029724
26.4378	-65.4319	-0.027594
26.4378	-65.7892	-0.025602
26.4378	-66.1466	-0.023764
26.4378	-66.5039	-0.022077
26.4378	-66.8612	-0.020524
26.4378	-67.2185	-0.019091
26.4378	-67.5759	-0.017775
26.4378	-67.9332	-0.016585
26.4378	-68.2905	-0.015544
26.4378	-68.6479	-0.014676
26.4378	-69.0052	-0.014003
26.4378	-69.3625	-0.013532
26.4378	-69.7198	-0.013249
26.4378	-70.0772	-0.013117
26.4378	-70.4345	-0.013082
26.4378	-70.7918	-0.013072
26.4378	-70.7918	-0.013014
26.4378	-71.5065	-0.012841
26.4378	-71.5065	-0.012504
26.4378	-72.2212	-0.011976
26.4378	-72.2212	-0.011261
26.4378	-72.9358	-0.010387
26.4378	-72.9358	-0.009408
26.4378	-73.6505	-0.008394
26.4378	-73.6505	-0.007421
26.4378	-74.3651	-0.006567
26.4378	-74.3651	-0.005902
26.4378	-75.0798	-0.00548
26.4378	-75.0798	-0.005341
26.4378	-75.7944	-0.005504
26.4378	-75.7944	-0.005975
26.4378	-76.5091	-0.006743
26.4378	-76.5091	-0.007787
26.4378	-77.2238	-0.009081
26.4378	-77.2238	-0.01059
26.4378	-77.9384	-0.012273
26.4378	-77.9384	-0.014083
26.4378	-78.6531	-0.015962
26.4378	-78.6531	-0.01784
26.4378	-79.3677	-0.019635
26.4378	-79.3677	-0.021257
26.4378	-80.0824	-0.02261
26.4378	-80.0824	-0.023605
26.4378	-80.7971	-0.024167
26.4378	-80.7971	-0.024243
26.4378	-81.5117	-0.023813
26.4378	-81.5117	-0.02289
26.4378	-82.2264	-0.021519
26.4378	-82.2264	-0.019773
26.4378	-82.941	-0.017742
26.4378	-82.941	-0.015524
26.4378	-83.6557	-0.013216
26.4378	-83.6557	-0.010907
26.4378	-84.3703	-0.008674
26.4378	-84.3703	-0.00658
26.4378	-85.085	-0.004673
26.4378	-85.085	-0.002988
26.4378	-85.7997	-0.001548
26.4378	-85.7997	-0.000366
26.4378	-86.5143	0.000557
26.4378	-86.5143	0.001231
26.4378	-87.229	0.001672
26.4378	-87.229	0.001905
26.4378	-87.9436	0.001957
26.4378	-87.9436	0.001853
26.4378	-88.6583	0.001617
26.4378	-88.6583	0.001263
26.4378	-89.373	0.000797
26.4378	-89.373	0.000217
26.4378	-90.0876	-0.000487
26.4378	-90.0876	-0.001325
26.4378	-90.8023	-0.002308
26.4378	-90.8023	-0.00344
26.4378	-91.5169	-0.004714
26.4378	-91.5169	-0.006111
26.4378	-92.2316	-0.007599
26.4378	-92.2316	-0.009131
26.4378	-92.9462	-0.010648
26.4378	-92.9462	-0.012087
26.4378	-93.6609	-0.013382
26.4378	-93.6609	-0.014469
26.4378	-94.3756	-0.015296
26.4378	-94.3756	-0.015822
26.4378	-95.0902	-0.016025
26.4378	-95.0902	-0.0159
26.4378	-95.8049	-0.015462
26.4378	-95.8049	-0.014742
26.4378	-96.5195	-0.013783
26.4378	-96.5195	-0.012641
26.4378	-97.2342	-0.011372
26.4378	-97.2342	-0.010036
26.4378	-97.9489	-0.008687
26.4378	-97.9489	-0.007374
26.4378	-98.6635	-0.00613
26.4378	-98.6635	-0.00498
26.4378	-99.3782	-0.003929
26.4378	-99.3782	-0.002972
26.4378	-100.093	-0.002087
26.4378	-100.093	-0.001247
26.4378	-100.807	-0.000416
26.4378	-100.807	0.000436
26.4378	-101.522	0.001336
26.4378	-101.522	0.002298
26.4378	-102.237	0.003321
26.4378	-102.237	0.004389
26.4378	-102.951	0.005473
26.4378	-102.951	0.006535
26.4378	-103.666	0.007536
26.4378	-103.666	0.008441
26.4378	-104.381	0.009225
26.4378	-104.381	0.009884
26.4378	-105.095	0.01043
26.4378	-105.095	0.010896
26.4378	-105.81	0.011335
26.4378	-105.81	0.011812
26.4378	-106.525	0.0124
26.4378	-106.525	0.013175
26.4378	-107.239	0.014213
26.4378	-107.239	0.015579
26.4378	-107.954	0.01733
26.4378	-107.954	0.019506
26.4378	-108.669	0.022131
26.4378	-108.669	0.025207
26.4378	-109.383	0.028712
26.4378	-109.383	0.032592
26.4378	-110.098	0.036765
26.4378	-110.098	0.041108
26.4378	-110.813	0.045463
26.4378	-110.813	0.049642
26.4378	-111.527	0.05343
26.4378	-111.527	0.056609
26.4378	-112.242	0.058975
26.4378	-112.242	0.060367
26.4378	-112.957	0.060683
26.4378	-112.957	0.059904
26.4378	-113.671	0.058098
26.4378	-113.671	0.055417
26.4378	-114.386	0.052078
26.4378	-114.386	0.048336
26.4378	-115.101	0.044459
26.4378	-115.101	0.040689
26.4378	-115.815	0.037224
26.4378	-115.815	0.034203
26.4378	-116.53	0.031699
26.4378	-116.53	0.02973
26.4378	-117.245	0.028269
26.4378	-117.245	0.027264
26.4378	-117.959	0.026656
26.4378	-117.959	0.026387
26.4378	-118.674	0.02641
26.4378	-118.674	0.02669
26.4378	-119.389	0.0272
26.4378	-119.389	0.02791
26.4378	-120.103	0.028785
26.4378	-120.103	0.029777
26.4378	-120.818	0.030824
26.4378	-120.818	0.031853
26.4378	-121.533	0.032781
26.4378	-121.533	0.03353
26.4378	-122.247	0.034027
26.4378	-122.247	0.034214
26.4378	-122.962	0.034052
26.4378	-122.962	0.033523
26.4378	-123.677	0.032626
26.4378	-123.677	0.031376
26.4378	-124.391	0.029803
26.4378	-124.391	0.027944
26.4378	-125.106	0.025845
26.4378	-125.106	0.023554
26.4378	-125.821	0.021123
26.4378	-125.821	0.018601
26.4378	-126.535	0.016037
26.4378	-126.535	0.013472
26.4378	-127.25	0.010938
26.4378	-127.25	0.008453
26.4378	-127.965	0.006018
26.4378	-127.965	0.003613
26.4378	-128.679	0.001204
26.4378	-128.679	-0.001262
26.4378	-129.394	-0.003845
26.4378	-129.394	-0.006603
26.4378	-130.108	-0.00958
26.4378	-130.108	-0.012797
26.4378	-130.823	-0.016237
26.4378	-130.823	-0.019844
26.4378	-131.538	-0.023516
26.4378	-131.538	-0.027114
26.4378	-132.252	-0.030472
26.4378	-132.252	-0.033418
26.4378	-132.967	-0.035787
26.4378	-132.967	-0.037446
26.4378	-133.682	-0.038309
26.4378	-133.682	-0.038347
26.4378	-134.396	-0.037595
26.4378	-134.396	-0.036146
26.4378	-135.111	-0.034138
26.4378	-135.111	-0.031742
26.4378	-135.826	-0.029137
26.4378	-135.826	-0.026495
26.4378	-136.54	-0.02396
26.4378	-136.54	-0.021635
26.4378	-137.255	-0.01958
26.4378	-137.255	-0.017806
26.4378	-137.97	-0.016285
26.4378	-137.97	-0.014958
26.4378	-138.684	-0.013749
26.4378	-138.684	-0.01258
26.4378	-139.399	-0.011378
26.4378	-139.399	-0.010091
26.4378	-140.114	-0.008686
26.4378	-140.114	-0.007158
26.4378	-140.828	-0.005526
26.4378	-140.828	-0.003828
26.4378	-141.543	-0.002123
26.4378	-141.543	-0.000477
26.4378	-142.258	0.001036
26.4378	-142.258	0.002341
26.4378	-142.972	0.003372
26.4378	-142.972	0.004077
26.4378	-143.687	0.004422
26.4378	-143.687	0.004402
26.4378	-144.402	0.004036
26.4378	-144.402	0.003377
26.4378	-145.116	0.002501
26.4378	-145.116	0.001505
26.4378	-145.831	0.000498
26.4378	-145.831	-0.000413
26.4378	-146.546	-0.001128
26.4378	-146.546	-0.001563
26.4378	-147.26	-0.001661
26.4378	-147.26	-0.001386
26.4378	-147.975	-0.000732
26.4378	-147.975	0.000284
26.4378	-148.69	0.001623
26.4378	-148.69	0.003228
26.4378	-149.404	0.005022
26.4378	-149.404	0.006921
26.4378	-150.119	0.00883
26.4378	-150.119	0.010653
26.4378	-150.834	0.012299
26.4378	-150.834	0.013685
26.4378	-151.548	0.01475
26.4378	-151.548	0.01545
26.4378	-152.263	0.015768
26.4378	-152.263	0.015709
26.4378	-152.978	0.015297
26.4378	-152.978	0.014572
26.4378	-153.692	0.013586
26.4378	-153.692	0.012394
26.4378	-154.407	0.011055
26.4378	-154.407	0.009623
26.4378	-155.122	0.00815
26.4378	-155.122	0.006682
26.4378	-155.836	0.005255
26.4378	-155.836	0.003895
26.4378	-156.551	0.002618
26.4378	-156.551	0.001431
26.4378	-157.265	0.000327
26.4378	-157.265	-0.000704
26.4378	-157.98	-0.001676
26.4378	-157.98	-0.002603
26.4378	-158.695	-0.003491
26.4378	-158.695	-0.004341
26.4378	-159.409	-0.005144
26.4378	-159.409	-0.005884
26.4378	-160.124	-0.006543
26.4378	-160.124	-0.007101
26.4378	-160.839	-0.007545
26.4378	-160.839	-0.007869
26.4378	-161.553	-0.008075
26.4378	-161.553	-0.008174
26.4378	-162.268	-0.008185
26.4378	-162.268	-0.008125
26.4378	-162.983	-0.008014
26.4378	-162.983	-0.007865
26.4378	-163.697	-0.007687
26.4378	-163.697	-0.007481
26.4378	-164.412	-0.007244
26.4378	-164.412	-0.006972
26.4378	-165.127	-0.006658
26.4378	-165.127	-0.0063
26.4378	-165.841	-0.005898
26.4378	-165.841	-0.00546
26.4378	-166.556	-0.005
26.4378	-166.556	-0.004536
26.4378	-167.271	-0.004087
26.4378	-167.271	-0.003675
26.4378	-167.985	-0.003318
26.4378	-167.985	-0.003025
26.4378	-168.7	-0.002803
26.4378	-168.7	-0.002645
26.4378	-169.415	-0.002541
26.4378	-169.415	-0.002472
26.4378	-170.129	-0.002418
26.4378	-170.129	-0.002357
26.4378	-170.844	-0.00227
26.4378	-170.844	-0.002141
26.4378	-171.559	-0.001957
26.4378	-171.559	-0.001708
26.4378	-172.273	-0.001386
26.4378	-172.273	-0.000982
26.4378	-172.988	-0.000487
26.4378	-172.988	0.000112
26.4378	-173.703	0.000823
26.4378	-173.703	0.001654
26.4378	-174.417	0.00261
26.4378	-174.417	0.003685
26.4378	-175.132	0.004865
26.4378	-175.132	0.006123
26.4378	-175.847	0.007423
26.4378	-175.847	0.008716
26.4378	-176.561	0.009948
26.4378	-176.561	0.011059
26.4378	-177.276	0.011991
26.4378	-177.276	0.012692
26.4378	-177.991	0.01312
26.4378	-177.991	0.013252
26.4378	-178.705	0.013081
26.4378	-178.705	0.012623
26.4378	-179.42	0.011912
26.4378	-179.42	0.010999
26.4378	-180.135	0.009946
26.4378	-180.135	0.008814
26.4378	-180.849	0.007662
26.4378	-180.849	0.006534
26.4378	-181.564	0.005453
26.4378	-181.564	0.004426
26.4378	-182.279	0.003439
26.4378	-182.279	0.002464
26.4378	-182.993	0.001468
26.4378	-182.993	0.000421
26.4378	-183.708	-0.000699
26.4378	-183.708	-0.001896
26.4378	-184.423	-0.003157
26.4378	-184.423	-0.00445
26.4378	-185.137	-0.005729
26.4378	-185.137	-0.006937
26.4378	-185.852	-0.008016
26.4378	-185.852	-0.008915
26.4378	-186.566	-0.009589
26.4378	-186.566	-0.010014
26.4378	-187.281	-0.010177
26.4378	-187.281	-0.010088
26.4378	-187.996	-0.009769
26.4378	-187.996	-0.009252
26.4378	-188.71	-0.008576
26.4378	-188.71	-0.007782
26.4378	-189.425	-0.006904
26.4378	-189.425	-0.005972
26.4378	-190.14	-0.005006
26.4378	-190.14	-0.004016
26.4378	-190.854	-0.003005
26.4378	-190.854	-0.001969
26.4378	-191.569	-0.0009
26.4378	-191.569	0.000214
26.4378	-192.284	0.001381
26.4378	-192.284	0.002609
26.4378	-192.998	0.003904
26.4378	-192.998	0.005266
26.4378	-193.713	0.00669
26.4378	-193.713	0.008164
26.4378	-194.428	0.009674
26.4378	-194.428	0.011198
26.4378	-195.142	0.012708
26.4378	-195.142	0.014175
26.4378	-195.857	0.015568
26.4378	-195.857	0.016852
26.4378	-196.572	0.017997
26.4378	-196.572	0.018972
26.4378	-197.286	0.019748
26.4378	-197.286	0.020301
26.4378	-198.001	0.020608
26.4378	-198.001	0.020652
26.4378	-198.716	0.020421
26.4378	-198.716	0.019911
26.4378	-199.43	0.019126
26.4378	-199.43	0.018083
26.4378	-200.145	0.016811
26.4378	-200.145	0.015353
26.4378	-200.86	0.013764
26.4378	-200.86	0.012108
26.4378	-201.574	0.010453
26.4378	-201.574	0.008869
26.4378	-202.289	0.007421
26.4378	-202.289	0.006167
26.4378	-203.004	0.005148
26.4378	-203.004	0.004391
26.4378	-203.718	0.003905
26.4378	-203.718	0.00368
26.4378	-204.433	0.003687
26.4378	-204.433	0.003887
26.4378	-205.148	0.004227
26.4378	-205.148	0.004652
26.4378	-205.862	0.005109
26.4378	-205.862	0.005551
26.4378	-206.577	0.005945
26.4378	-206.577	0.006269
26.4378	-207.292	0.006515
26.4378	-207.292	0.006686
26.4378	-208.006	0.006792
26.4378	-208.006	0.006845
26.4378	-208.721	0.006855
26.4378	-208.721	0.006826
26.4378	-209.436	0.006755
26.4378	-209.436	0.006632
26.4378	-210.15	0.006442
26.4378	-210.15	0.006167
26.4378	-210.865	0.005789
26.4378	-210.865	0.005294
26.4378	-211.58	0.00467
26.4378	-211.58	0.003914
26.4378	-212.294	0.003026
26.4378	-212.294	0.002017
26.4378	-213.009	0.0009
26.4378	-213.009	-0.000303
>
68.5578	0.892161	0.271719
68.5578	0.512744	0.250193
68.5578	0.133326	0.228973
68.5578	-0.246091	0.207994
68.5578	-0.625508	0.18708
68.5578	-1.00493	0.166008
68.5578	-1.38434	0.144564
68.5578	-1.76376	0.122601
68.5578	-2.14318	0.100072
68.5578	-2.5226	0.077061
68.5578	-2.90201	0.053786
68.5578	-3.28143	0.030601
68.5578	-3.66085	0.007971
68.5578	-4.04026	-0.013549
68.5578	-4.41968	-0.033359
68.5578	-4.7991	-0.050858
68.5578	-5.17852	-0.065493
68.5578	-5.55793	-0.076816
68.5578	-5.93735	-0.084525
68.5578	-6.31677	-0.088505
68.5578	-6.69619	-0.088844
68.5578	-7.0756	-0.085834
68.5578	-7.45502	-0.079954
68.5578	-7.83444	-0.071836
68.5578	-8.21386	-0.062215
68.5578	-8.59327	-0.051879
68.5578	-8.97269	-0.04161
68.5578	-9.35211	-0.032136
68.5578	-9.73153	-0.024085
68.5578	-10.1109	-0.017949
68.5578	-10.4904	-0.014054
68.5578	-10.8698	-0.012544
68.5578	-11.2492	-0.013372
68.5578	-11.6286	-0.016305
68.5578	-12.008	-0.020939
68.5578	-12.3874	-0.026729
68.5578	-12.7669	-0.033031
68.5578	-13.1463	-0.039156
68.5578	-13.5257	-0.044426
68.5578	-13.9051	-0.048235
68.5578	-14.2845	-0.050102
68.5578	-14.664	-0.049716
68.5578	-15.0434	-0.046958
68.5578	-15.4228	-0.041909
68.5578	-15.8022	-0.034835
68.5578	-16.1816	-0.026151
68.5578	-16.561	-0.016385
68.5578	-16.9405	-0.006119
68.5578	-17.3199	0.004059
68.5578	-17.6993	0.013597
68.5578	-18.0787	0.022026
68.5578	-18.4581	0.028977
68.5578	-18.8375	0.034205
68.5578	-19.217	0.037591
68.5578	-19.5964	0.03914
68.5578	-19.9758	0.038966
68.5578	-20.3552	0.037279
68.5578	-20.7346	0.034354
68.5578	-21.114	0.030511
68.5578	-21.4935	0.026086
68.5578	-21.8729	0.021407
68.5578	-22.2523	0.01677
68.5578	-22.6317	0.012429
68.5578	-23.0111	0.008581
68.5578	-23.3906	0.005367
68.5578	-23.77	0.002877
68.5578	-24.1494	0.00116
68.5578	-24.5288	0.000238
68.5578	-24.9082	0.000122
68.5578	-25.2876	0.000828
68.5578	-25.6671	0.002379
68.5578	-26.0465	0.004812
68.5578	-26.4259	0.008167
68.5578	-26.8053	0.012474
68.5578	-27.1847	0.017735
68.5578	-27.5641	0.023909
68.5578	-27.9436	0.030892
68.5578	-28.323	0.038513
68.5578	-28.7024	0.046542
68.5578	-29.0818	0.054693
68.5578	-29.4612	0.062653
68.5578	-29.8406	0.070096
68.5578	-30.2201	0.076714
68.5578	-30.5995	0.082232
68.5578	-30.9789	0.086423
68.5578	-31.3583	0.089117
68.5578	-31.7377	0.090199
68.5578	-32.1172	0.089605
68.5578	-32.4966	0.087315
68.5578	-32.876	0.083346
68.5578	-33.2554	0.077743
68.5578	-33.6348	0.070577
68.5578	-34.0142	0.061943
68.5578	-34.3937	0.05196
68.5578	-34.7731	0.040778
68.5578	-35.1525	0.02858
68.5578	-35.5319	0.015591
68.5578	-35.9113	0.002081
68.5578	-36.2907	-0.011631
68.5578	-36.6702	-0.025179
68.5578	-37.0496	-0.038155
68.5578	-37.429	-0.050127
68.5578	-37.8084	-0.060656
68.5578	-38.1878	-0.069333
68.5578	-38.5672	-0.075808
68.5578	-38.9467	-0.079833
68.5578	-39.3261	-0.081288
68.5578	-39.7055	-0.080202
68.5578	-40.0849	-0.076758
68.5578	-40.4643	-0.071278
68.5578	-40.8437	-0.064191
68.5578	-41.2232	-0.055988
68.5578	-41.6026	-0.047175
68.5578	-41.982	-0.038218
68.5578	-42.3614	-0.029506
68.5578	-42.7408	-0.021324
68.5578	-43.1203	-0.013843
68.5578	-43.4997	-0.007126
68.5578	-43.8791	-0.001146
68.5578	-44.2585	0.004183
68.5578	-44.6379	0.00898
68.5578	-45.0173	0.013358
68.5578	-45.3968	0.017406
68.5578	-45.7762	0.021167
68.5578	-46.1556	0.024628
68.5578	-46.535	0.027728
68.5578	-46.9144	0.030357
68.5578	-47.2938	0.032385
68.5578	-47.6733	0.03367
68.5578	-48.0527	0.034089
68.5578	-48.4321	0.033548
68.5578	-48.8115	0.032004
68.5578	-49.1909	0.029465
68.5578	-49.5703	0.025995
68.5578	-49.9498	0.021708
68.5578	-50.3292	0.016755
68.5578	-50.7086	0.01132
68.5578	-51.088	0.005602
68.5578	-51.4674	-0.000194
68.5578	-51.8469	-0.005862
68.5578	-52.2263	-0.01121
68.5578	-52.6057	-0.016063
68.5578	-52.9851	-0.020271
68.5578	-53.3645	-0.023715
68.5578	-53.7439	-0.026316
68.5578	-54.1234	-0.028035
68.5578	-54.5028	-0.028882
68.5578	-54.8822	-0.02891
68.5578	-55.2616	-0.028212
68.5578	-55.641	-0.026918
68.5578	-56.0204	-0.025181
68.5578	-56.3999	-0.023166
68.5578	-56.7793	-0.021041
68.5578	-57.1587	-0.018961
68.5578	-57.5381	-0.01706
68.5578	-57.9175	-0.015446
68.5578	-58.2969	-0.014195
68.5578	-58.6764	-0.013354
68.5578	-59.0558	-0.012945
68.5578	-59.4352	-0.012965
68.5578	-59.8146	-0.013403
68.5578	-60.194	-0.014235
68.5578	-60.5735	-0.015434
68.5578	-60.9529	-0.016966
68.5578	-61.3323	-0.018792
68.5578	-61.7117	-0.02086
68.5578	-62.0911	-0.023104
68.5578	-62.4705	-0.025443
68.5578	-62.85	-0.027774
68.5578	-63.2294	-0.029983
68.5578	-63.6088	-0.031947
68.5578	-63.9882	-0.033542
68.5578	-64.3676	-0.034651
68.5578	-64.747	-0.035177
68.5578	-65.1265	-0.035049
68.5578	-65.5059	-0.034226
68.5578	-65.8853	-0.0327
68.5578	-66.2647	-0.030497
68.5578	-66.6441	-0.027668
68.5578	-67.0235	-0.024284
68.5578	-67.403	-0.020426
68.5578	-67.7824	-0.016171
68.5578	-68.1618	-0.011591
68.5578	-68.5412	-0.006744
68.5578	-68.9206	-0.001677
68.5578	-69.3001	0.003568
68.5578	-69.6795	0.008941
68.5578	-70.0589	0.014377
68.5578	-70.4383	0.019777
68.5578	-70.8177	0.02501
68.5578	-71.1971	0.029906
68.5578	-71.5766	0.034273
68.5578	-71.956	0.037906
68.5578	-72.3354	0.040618
68.5578	-72.7148	0.042261
68.5578	-73.0942	0.042752
68.5578	-73.4736	0.042091
68.5578	-73.8531	0.040362
68.5578	-74.2325	0.037737
68.5578	-74.6119	0.034455
68.5578	-74.9913	0.0308
68.5578	-75.3707	0.02707
68.5578	-75.7501	0.023552
68.5578	-76.1296	0.020493
68.5578	-76.509	0.018085
68.5578	-76.8884	0.016451
68.5578	-77.2678	0.015646
68.5578	-77.6472	0.015655
68.5578	-78.0267	0.016406
68.5578	-78.4061	0.017775
68.5578	-78.7855	0.0196
68.5578	-79.1649	0.021688
68.5578	-79.5443	0.023829
68.5578	-79.9237	0.025805
68.5578	-80.3032	0.027409
68.5578	-80.6826	0.028453
68.5578	-81.062	0.028791
68.5578	-81.4414	0.028324
68.5578	-81.8208	0.027012
68.5578	-82.2002	0.024876
68.5578	-82.5797	0.021996
68.5578	-82.9591	0.018495
68.5578	-83.3385	0.014525
68.5578	-83.7179	0.010254
68.5578	-84.0973	0.005845
68.5578	-84.4767	0.001446
68.5578	-84.8562	-0.002815
68.5578	-85.2356	-0.006835
68.5578	-85.615	-0.01053
68.5578	-85.9944	-0.013835
68.5578	-86.3738	-0.0167
68.5578	-86.7533	-0.019087
68.5578	-87.1327	-0.020971
68.5578	-87.5121	-0.022344
68.5578	-87.8915	-0.023214
68.5578	-88.2709	-0.02361
68.5578	-88.6503	-0.023579
68.5578	-89.0298	-0.023182
68.5578	-89.4092	-0.022485
68.5578	-89.7886	-0.02156
68.5578	-90.168	-0.020468
68.5578	-90.5474	-0.019263
68.5578	-90.9268	-0.017984
68.5578	-91.3063	-0.01666
68.5578	-91.6857	-0.015309
68.5578	-92.0651	-0.013943
68.5578	-92.4445	-0.012568
68.5578	-92.8239	-0.011186
68.5578	-93.2033	-0.00979
68.5578	-93.5828	-0.008369
68.5578	-93.9622	-0.006901
68.5578	-94.3416	-0.00536
68.5578	-94.721	-0.003717
68.5578	-95.1004	-0.001947
68.5578	-95.4799	-4e-05
68.5578	-95.8593	0.001992
68.5578	-96.2387	0.004115
68.5578	-96.6181	0.006266
68.5578	-96.9975	0.00836
68.5578	-97.3769	0.0103
68.5578	-97.7564	0.011982
68.5578	-98.1358	0.013315
68.5578	-98.5152	0.014226
68.5578	-98.8946	0.014671
68.5578	-99.274	0.014644
68.5578	-99.6534	0.014171
68.5578	-100.033	0.013313
68.5578	-100.412	0.012155
68.5578	-100.792	0.010799
68.5578	-101.171	0.009354
68.5578	-101.551	0.007924
68.5578	-101.93	0.006604
68.5578	-102.309	0.005472
68.5578	-102.689	0.004591
68.5578	-103.068	0.004007
68.5578	-103.448	0.00375
68.5578	-103.827	0.003841
68.5578	-104.206	0.004289
68.5578	-104.586	0.005094
68.5578	-104.965	0.00624
68.5578	-105.345	0.007696
68.5578	-105.724	0.009413
68.5578	-106.104	0.01132
68.5578	-106.483	0.013331
68.5578	-106.862	0.015349
68.5578	-107.242	0.017274
68.5578	-107.621	0.019013
68.5578	-108.001	0.02049
68.5578	-108.38	0.021655
68.5578	-108.759	0.02248
68.5578	-109.139	0.022965
68.5578	-109.518	0.023132
68.5578	-109.898	0.023021
68.5578	-110.277	0.02268
68.5578	-110.657	0.022165
68.5578	-111.036	0.021534
68.5578	-111.415	0.020848
68.5578	-111.795	0.020159
68.5578	-112.174	0.019516
68.5578	-112.554	0.018956
68.5578	-112.933	0.018498
68.5578	-113.312	0.018145
68.5578	-113.692	0.017874
68.5578	-114.071	0.017645
68.5578	-114.451	0.017402
68.5578	-114.83	0.01708
68.5578	-115.21	0.016619
68.5578	-115.589	0.015969
68.5578	-115.968	0.0151
68.5578	-116.348	0.014003
68.5578	-116.727	0.012692
68.5578	-117.107	0.0112
68.5578	-117.486	0.009572
68.5578	-117.865	0.007854
68.5578	-118.245	0.00609
68.5578	-118.624	0.004312
68.5578	-119.004	0.002538
68.5578	-119.383	0.000766
68.5578	-119.763	-0.001026
68.5578	-120.142	-0.002878
68.5578	-120.521	-0.004844
68.5578	-120.901	-0.006989
68.5578	-121.28	-0.009376
68.5578	-121.66	-0.012059
68.5578	-122.039	-0.015066
68.5578	-122.418	-0.01839
68.5578	-122.798	-0.021973
68.5578	-123.177	-0.025713
68.5578	-123.557	-0.029453
68.5578	-123.936	-0.033004
68.5578	-124.316	-0.036159
68.5578	-124.695	-0.038714
68.5578	-125.074	-0.0405
68.5578	-125.454	-0.041399
68.5578	-125.833	-0.041363
68.5578	-126.213	-0.040414
68.5578	-126.592	-0.038646
68.5578	-126.971	-0.036207
68.5578	-127.351	-0.033277
68.5578	-127.73	-0.030048
68.5578	-128.11	-0.026698
68.5578	-128.489	-0.023377
68.5578	-128.869	-0.02019
68.5578	-129.248	-0.017202
68.5578	-129.627	-0.014436
68.5578	-130.007	-0.011886
68.5578	-130.386	-0.00953
68.5578	-130.766	-0.007342
68.5578	-131.145	-0.005308
68.5578	-131.525	-0.003425
68.5578	-131.904	-0.001711
68.5578	-132.283	-0.000194
68.5578	-132.663	0.00109
68.5578	-133.042	0.002109
68.5578	-133.422	0.002843
68.5578	-133.801	0.003287
68.5578	-134.18	0.00346
68.5578	-134.56	0.003396
68.5578	-134.939	0.003146
68.5578	-135.319	0.002769
68.5578	-135.698	0.002322
68.5578	-136.078	0.00186
68.5578	-136.457	0.001428
68.5578	-136.836	0.001058
68.5578	-137.216	0.000769
68.5578	-137.595	0.000567
68.5578	-137.975	0.000443
68.5578	-138.354	0.000373
68.5578	-138.733	0.000324
68.5578	-139.113	0.000251
68.5578	-139.492	0.000104
68.5578	-139.872	-0.000169
68.5578	-140.251	-0.000613
68.5578	-140.631	-0.001258
68.5578	-141.01	-0.002117
68.5578	-141.389	-0.003179
68.5578	-141.769	-0.004404
68.5578	-142.148	-0.005732
68.5578	-142.528	-0.007079
68.5578	-142.907	-0.00835
68.5578	-143.286	-0.009445
68.5578	-143.666	-0.010268
68.5578	-144.045	-0.010732
68.5578	-144.425	-0.010773
68.5578	-144.804	-0.010346
68.5578	-145.184	-0.009437
68.5578	-145.563	-0.008058
68.5578	-145.942	-0.006251
68.5578	-146.322	-0.00409
68.5578	-146.701	-0.00167
68.5578	-147.081	0.000892
68.5578	-147.46	0.003463
68.5578	-147.839	0.005912
68.5578	-148.219	0.008114
68.5578	-148.598	0.009966
68.5578	-148.978	0.011393
68.5578	-149.357	0.012357
68.5578	-149.737	0.012857
68.5578	-150.116	0.012926
68.5578	-150.495	0.012622
68.5578	-150.875	0.01202
68.5578	-151.254	0.011203
68.5578	-151.634	0.010249
68.5578	-152.013	0.009232
68.5578	-152.392	0.008216
68.5578	-152.772	0.007252
68.5578	-153.151	0.006384
68.5578	-153.531	0.005646
68.5578	-153.91	0.005061
68.5578	-154.29	0.004641
68.5578	-154.669	0.004383
68.5578	-155.048	0.004264
68.5578	-155.428	0.004236
68.5578	-155.807	0.004235
68.5578	-156.187	0.004172
68.5578	-156.566	0.00395
68.5578	-156.945	0.003477
68.5578	-157.325	0.002672
68.5578	-157.704	0.00149
68.5578	-158.084	-7.1e-05
68.5578	-158.463	-0.001964
68.5578	-158.843	-0.004093
68.5578	-159.222	-0.006323
68.5578	-159.601	-0.008496
68.5578	-159.981	-0.01045
68.5578	-160.36	-0.012042
68.5578	-160.74	-0.013163
68.5578	-161.119	-0.013747
68.5578	-161.498	-0.013778
68.5578	-161.878	-0.013285
68.5578	-162.257	-0.012328
68.5578	-162.637	-0.010989
68.5578	-163.016	-0.009357
68.5578	-163.396	-0.007523
68.5578	-163.775	-0.00557
68.5578	-164.154	-0.003575
68.5578	-164.534	-0.001608
68.5578	-164.913	0.000261
68.5578	-165.293	0.001959
68.5578	-165.672	0.003412
68.5578	-166.051	0.004544
68.5578	-166.431	0.005285
68.5578	-166.81	0.005581
68.5578	-167.19	0.005399
68.5578	-167.569	0.004738
68.5578	-167.949	0.003636
68.5578	-168.328	0.002166
68.5578	-168.707	0.000433
68.5578	-169.087	-0.001439
68.5578	-169.466	-0.003317
68.5578	-169.846	-0.005079
68.5578	-170.225	-0.006627
68.5578	-170.604	-0.007896
68.5578	-170.984	-0.00886
68.5578	-171.363	-0.009528
68.5578	-171.743	-0.009938
68.5578	-172.122	-0.010145
68.5578	-172.502	-0.010206
68.5578	-172.881	-0.010168
68.5578	-173.26	-0.010062
68.5578	-173.64	-0.0099
68.5578	-174.019	-0.009671
68.5578	-174.399	-0.009354
68.5578	-174.778	-0.008919
68.5578	-175.157	-0.008337
68.5578	-175.537	-0.007589
68.5578	-175.916	-0.006665
68.5578	-176.296	-0.005566
68.5578	-176.675	-0.004306
68.5578	-177.055	-0.002905
68.5578	-177.434	-0.001389
68.5578	-177.813	0.000211
68.5578	-178.193	0.001861
68.5578	-178.572	0.003517
68.5578	-178.952	0.005133
68.5578	-179.331	0.006651
68.5578	-179.711	0.008007
68.5578	-180.09	0.009134
68.5578	-180.469	0.009967
68.5578	-180.849	0.010446
68.5578	-181.228	0.010527
68.5578	-181.608	0.010184
68.5578	-181.987	0.009409
68.5578	-182.366	0.008217
68.5578	-182.746	0.006639
68.5578	-183.125	0.004722
68.5578	-183.505	0.002525
68.5578	-183.884	0.000119
68.5578	-184.264	-0.002421
68.5578	-184.643	-0.005008
68.5578	-185.022	-0.007554
68.5578	-185.402	-0.009966
68.5578	-185.781	-0.012152
68.5578	-186.161	-0.014028
68.5578	-186.54	-0.015522
68.5578	-186.919	-0.016577
68.5578	-187.299	-0.017161
68.5578	-187.678	-0.017262
68.5578	-188.058	-0.016895
68.5578	-188.437	-0.016091
68.5578	-188.817	-0.014902
68.5578	-189.196	-0.013386
68.5578	-189.575	-0.011611
68.5578	-189.955	-0.009642
68.5578	-190.334	-0.007543
68.5578	-190.714	-0.005373
68.5578	-191.093	-0.003184
68.5578	-191.472	-0.001025
68.5578	-191.852	0.00106
68.5578	-192.231	0.003029
68.5578	-192.611	0.004839
68.5578	-192.99	0.00645
68.5578	-193.37	0.007821
68.5578	-193.749	0.008915
68.5578	-194.128	0.009704
68.5578	-194.508	0.010166
68.5578	-194.887	0.010299
68.5578	-195.267	0.010114
68.5578	-195.646	0.009644
68.5578	-196.025	0.008939
68.5578	-196.405	0.008063
68.5578	-196.784	0.00709
68.5578	-197.164	0.006097
68.5578	-197.543	0.005155
68.5578	-197.923	0.004325
68.5578	-198.302	0.003652
68.5578	-198.681	0.003165
68.5578	-199.061	0.002876
68.5578	-199.44	0.00279
68.5578	-199.82	0.002902
68.5578	-200.199	0.003211
68.5578	-200.578	0.003722
68.5578	-200.958	0.004447
68.5578	-201.337	0.0054
68.5578	-201.717	0.006596
68.5578	-202.096	0.008038
68.5578	-202.476	0.009709
68.5578	-202.855	0.011566
68.5578	-203.234	0.013534
68.5578	-203.614	0.015511
68.5578	-203.993	0.017378
68.5578	-204.373	0.01901
68.5578	-204.752	0.020294
68.5578	-205.131	0.021141
68.5578	-205.511	0.021503
68.5578	-205.89	0.02137
68.5578	-206.27	0.020774
68.5578	-206.649	0.019779
68.5578	-207.029	0.01847
68.5578	-207.408	0.016936
68.5578	-207.787	0.015265
68.5578	-208.167	0.013528
68.5578	-208.546	0.011783
68.5578	-208.926	0.010069
68.5578	-209.305	0.008414
68.5578	-209.684	0.006844
68.5578	-210.064	0.00538
68.5578	-210.443	0.004054
68.5578	-210.823	0.002898
68.5578	-211.202	0.00195
68.5578	-211.582	0.001246
68.5578	-211.961	0.000813
68.5578	-212.34	0.000667
68.5578	-212.72	0.000803
68.5578	-213.099	0.001195
68.5578	-213.479	0.001801
68.5578	-213.858	0.002559
68.5578	-214.237	0.003399
68.5578	-214.617	0.004248
68.5578	-214.996	0.005039
68.5578	-215.376	0.005717
68.5578	-215.755	0.006243
68.5578	-216.135	0.0066
68.5578	-216.514	0.006792
68.5578	-216.893	0.006839
68.5578	-217.273	0.006778
68.5578	-217.652	0.006651
68.5578	-218.032	0.006506
68.5578	-218.411	0.006384
68.5578	-218.79	0.006319
68.5578	-219.17	0.006328
68.5578	-219.549	0.006413
68.5578	-219.929	0.006557
68.5578	-220.308	0.006723
68.5578	-220.688	0.006863
68.5578	-221.067	0.006917
68.5578	-221.446	0.006822
68.5578	-221.826	0.006523
68.5578	-222.205	0.005971
68.5578	-222.585	0.005138
68.5578	-222.964	0.004013
68.5578	-223.344	0.002609
68.5578	-223.723	0.000959
68.5578	-224.102	-0.000884
68.5578	-224.482	-0.002851
68.5578	-224.861	-0.004858
68.5578	-225.241	-0.006814
68.5578	-225.62	-0.008625
68.5578	-225.999	-0.010198
68.5578	-226.379	-0.01145
>
>
130.92	0.755369	0.156281
130.92	0.33421	0.140093
130.92	-0.086949	0.12305
130.92	-0.508108	0.106392
130.92	-0.929267	0.091211
130.92	-1.35043	0.078395
130.92	-1.77159	0.068593
130.92	-2.19274	0.062212
130.92	-2.6139	0.059424
130.92	-3.03506	0.060188
130.92	-3.45622	0.064269
130.92	-3.87738	0.071256
130.92	-4.29854	0.080572
130.92	-4.7197	0.091498
130.92	-5.14086	0.103196
130.92	-5.56202	0.114752
130.92	-5.98318	0.125228
130.92	-6.40433	0.133725
130.92	-6.82549	0.139457
130.92	-7.24665	0.141814
130.92	-7.66781	0.140413
130.92	-8.08897	0.135132
130.92	-8.51013	0.126114
130.92	-8.93129	0.113744
130.92	-9.35245	0.098605
130.92	-9.77361	0.081418
130.92	-10.1948	0.062978
130.92	-10.6159	0.044085
130.92	-11.0371	0.025496
130.92	-11.4582	0.007881
130.92	-11.8794	-0.008201
130.92	-12.3006	-0.022314
130.92	-12.7217	-0.034144
130.92	-13.1429	-0.043501
130.92	-13.564	-0.050308
130.92	-13.9852	-0.054595
130.92	-14.4064	-0.05649
130.92	-14.8275	-0.05621
130.92	-15.2487	-0.054049
130.92	-15.6698	-0.050357
130.92	-16.091	-0.04552
130.92	-16.5122	-0.039935
130.92	-16.9333	-0.033984
130.92	-17.3545	-0.028012
130.92	-17.7756	-0.022306
130.92	-18.1968	-0.017095
130.92	-18.6179	-0.012526
130.92	-19.0391	-0.008696
130.92	-19.4603	-0.005637
130.92	-19.8814	-0.003337
130.92	-20.3026	-0.001744
130.92	-20.7237	-0.000777
130.92	-21.1449	-0.00033
130.92	-21.5661	-0.000283
130.92	-21.9872	-0.000505
130.92	-22.4084	-0.000866
130.92	-22.8295	-0.001244
130.92	-23.2507	-0.001535
130.92	-23.6719	-0.001665
130.92	-24.093	-0.001584
130.92	-24.5142	-0.001279
130.92	-24.9353	-0.000765
130.92	-25.3565	-8.1e-05
130.92	-25.7776	0.000716
130.92	-26.1988	0.001559
130.92	-26.62	0.002382
130.92	-27.0411	0.003128
130.92	-27.4623	0.003755
130.92	-27.8834	0.004241
130.92	-28.3046	0.004594
130.92	-28.7258	0.004849
130.92	-29.1469	0.005071
130.92	-29.5681	0.005357
130.92	-29.9892	0.005825
130.92	-30.4104	0.006609
130.92	-30.8316	0.00785
130.92	-31.2527	0.009684
130.92	-31.6739	0.012227
130.92	-32.095	0.015561
130.92	-32.5162	0.019725
130.92	-32.9374	0.024697
130.92	-33.3585	0.030392
130.92	-33.7797	0.036652
130.92	-34.2008	0.043251
130.92	-34.622	0.049897
130.92	-35.0431	0.056254
130.92	-35.4643	0.061956
130.92	-35.8855	0.066642
130.92	-36.3066	0.069985
130.92	-36.7278	0.071722
130.92	-37.1489	0.071684
130.92	-37.5701	0.06982
130.92	-37.9913	0.066184
130.92	-38.4124	0.060953
130.92	-38.8336	0.054392
130.92	-39.2547	0.046829
130.92	-39.6759	0.038619
130.92	-40.0971	0.030112
130.92	-40.5182	0.021623
130.92	-40.9394	0.013414
130.92	-41.3605	0.005685
130.92	-41.7817	-0.001422
130.92	-42.2029	-0.007817
130.92	-42.624	-0.013446
130.92	-43.0452	-0.01828
130.92	-43.4663	-0.022297
130.92	-43.8875	-0.025481
130.92	-44.3086	-0.027819
130.92	-44.7298	-0.029302
130.92	-45.151	-0.029933
130.92	-45.5721	-0.029731
130.92	-45.9933	-0.028746
130.92	-46.4144	-0.027056
130.92	-46.8356	-0.024772
130.92	-47.2568	-0.022035
130.92	-47.6779	-0.019007
130.92	-48.0991	-0.015862
130.92	-48.5202	-0.012774
130.92	-48.9414	-0.009901
130.92	-49.3626	-0.007383
130.92	-49.7837	-0.005323
130.92	-50.2049	-0.003796
130.92	-50.626	-0.002837
130.92	-51.0472	-0.002453
130.92	-51.4683	-0.002627
130.92	-51.8895	-0.003321
130.92	-52.3107	-0.004489
130.92	-52.7318	-0.006081
130.92	-53.153	-0.008048
130.92	-53.5741	-0.010341
130.92	-53.9953	-0.012912
130.92	-54.4165	-0.01571
130.92	-54.8376	-0.018679
130.92	-55.2588	-0.021756
130.92	-55.6799	-0.02487
130.92	-56.1011	-0.027944
130.92	-56.5223	-0.030902
130.92	-56.9434	-0.033675
130.92	-57.3646	-0.036209
130.92	-57.7857	-0.038462
130.92	-58.2069	-0.040409
130.92	-58.6281	-0.042039
130.92	-59.0492	-0.043343
130.92	-59.4704	-0.044311
130.92	-59.8915	-0.044923
130.92	-60.3127	-0.045149
130.92	-60.7338	-0.044947
130.92	-61.155	-0.044272
130.92	-61.5762	-0.043088
130.92	-61.9973	-0.041375
130.92	-62.4185	-0.039144
130.92	-62.8396	-0.036445
130.92	-63.2608	-0.033362
130.92	-63.682	-0.030015
130.92	-64.1031	-0.026547
130.92	-64.5243	-0.023114
130.92	-64.9454	-0.019868
130.92	-65.3666	-0.016947
130.92	-65.7878	-0.014467
130.92	-66.2089	-0.012508
130.92	-66.6301	-0.011123
130.92	-67.0512	-0.010324
130.92	-67.4724	-0.010095
130.92	-67.8936	-0.010385
130.92	-68.3147	-0.011117
130.92	-68.7359	-0.012191
130.92	-69.157	-0.013491
130.92	-69.5782	-0.014891
130.92	-69.9993	-0.016264
130.92	-70.4205	-0.017491
130.92	-70.8417	-0.018472
130.92	-71.2628	-0.019127
130.92	-71.684	-0.019409
130.92	-72.1051	-0.0193
130.92	-72.5263	-0.018813
130.92	-72.9475	-0.017989
130.92	-73.3686	-0.016891
130.92	-73.7898	-0.015593
130.92	-74.2109	-0.01418
130.92	-74.6321	-0.012737
130.92	-75.0533	-0.011331
130.92	-75.4744	-0.01003
130.92	-75.8956	-0.008878
130.92	-76.3167	-0.007903
130.92	-76.7379	-0.007118
130.92	-77.1591	-0.006518
130.92	-77.5802	-0.006089
130.92	-78.0014	-0.005809
130.92	-78.4225	-0.005653
130.92	-78.8437	-0.005597
130.92	-79.2648	-0.005622
130.92	-79.686	-0.005713
130.92	-80.1072	-0.005859
130.92	-80.5283	-0.006054
130.92	-80.9495	-0.006291
[truncated: 9,417 more rows]

## Sheet: Figure 2b
Figure 2b
	Simple velocity model for station AHLT
				thickness (km)	Vs (km/s)	Vp/Vs
				4.5	3.4	1.7
				16	3.6	1.73
				9.5	3.1	1.9
				12.5	4.16	1.73
				7.5	3.6	2
				110	3.95	2
	Simple velocity model for station HAMR
				thickness (km)	Vs (km/s)	Vp/Vs
				4.5	2.9	2
				19.5	3.55	1.73
				8.5	2.9	2
				8.5	4	1.8
				8	3.65	2
				111	4.27	1.85

## Sheet: Figure 3c
Figure 3c
MCMC RF inversion result (Vs)
Distance/km	Depth/km (postive represents above sea level)	Vs (km/s)
21	0.274	3.38361
21	-0.526	3.38469
21	-1.326	3.40143
21	-2.126	3.40981
21	-2.926	3.51113
21	-3.726	3.55686
21	-4.526	3.55657
21	-5.326	3.54636
21	-6.126	3.51877
21	-6.926	3.51235
21	-7.726	3.55922
21	-8.526	3.62659
21	-9.326	3.64214
21	-10.126	3.64446
21	-10.926	3.85272
21	-11.726	3.97705
21	-12.526	3.97897
21	-13.326	3.97905
21	-14.126	3.97905
21	-14.926	3.97905
21	-15.726	3.97905
21	-16.526	3.97906
21	-17.326	3.97906
21	-18.126	3.97906
21	-18.926	3.97906
21	-19.726	3.97906
21	-20.526	3.97906
21	-21.326	3.97906
21	-22.126	3.97906
21	-22.926	3.97906
21	-23.726	3.97906
21	-24.526	3.97912
21	-25.326	3.97857
21	-26.126	3.97811
21	-26.926	3.97776
21	-27.726	3.97348
21	-28.526	3.95963
21	-29.326	3.95207
21	-30.126	3.94306
21	-30.926	3.93998
21	-31.726	3.94257
21	-32.526	3.9502
21	-33.326	3.95061
21	-34.126	3.95061
21	-34.926	3.95061
21	-35.726	3.95642
21	-36.526	3.96262
21	-37.326	4.01897
21	-38.126	4.1866
21	-38.926	4.20972
21	-39.726	4.21924
21	-40.526	4.22604
21	-41.326	4.24685
21	-42.126	4.39217
21	-42.926	4.53851
21	-43.726	4.55697
21	-44.526	4.55019
21	-45.326	4.49117
21	-46.126	4.39121
21	-46.926	4.36359
21	-47.726	4.35869
21	-48.526	4.35684
21	-49.326	4.35309
21	-50.126	4.39568
21	-50.926	4.43375
21	-51.726	4.42947
21	-52.526	4.4262
21	-53.326	4.42696
21	-54.126	4.42843
21	-54.926	4.42975
21	-55.726	4.4351
21	-56.526	4.46054
21	-57.326	4.50044
21	-58.126	4.51439
21	-58.926	4.5184
21	-59.726	4.52181
21	-60.526	4.52293
21	-61.326	4.52149
21	-62.126	4.52003
21	-62.926	4.52126
21	-63.726	4.52369
21	-64.526	4.52906
21	-65.326	4.54147
21	-66.126	4.56281
21	-66.926	4.51984
21	-67.726	4.38173
21	-68.526	4.36539
21	-69.326	4.55957
21	-70.126	4.62704
21	-70.926	4.62885
21	-71.726	4.63128
21	-72.526	4.63341
21	-73.326	4.63549
21	-74.126	4.63697
21	-74.926	4.6341
21	-75.726	4.61982
21	-76.526	4.55688
21	-77.326	4.45329
21	-78.126	4.4162
21	-78.926	4.4106
27	0.89	3.27718
27	0.09	3.28603
27	-0.71	3.42378
27	-1.51	3.46605
27	-2.31	3.42796
27	-3.11	3.41235
27	-3.91	3.57957
27	-4.71	3.82789
27	-5.51	3.8797
27	-6.31	3.8797
27	-7.11	3.8797
27	-7.91	3.8797
27	-8.71	3.8797
27	-9.51	3.8797
27	-10.31	3.8797
27	-11.11	3.8797
27	-11.91	3.8797
27	-12.71	3.8797
27	-13.51	3.8797
27	-14.31	3.8797
27	-15.11	3.8797
27	-15.91	3.8797
27	-16.71	3.8797
27	-17.51	3.8797
27	-18.31	3.8797
27	-19.11	3.8797
27	-19.91	3.8797
27	-20.71	3.8797
27	-21.51	3.8797
27	-22.31	3.8797
27	-23.11	3.8797
27	-23.91	3.8797
27	-24.71	3.8797
27	-25.51	3.8797
27	-26.31	3.8797
27	-27.11	3.8797
27	-27.91	3.8797
27	-28.71	3.8797
27	-29.51	3.8797
27	-30.31	3.8797
27	-31.11	3.8797
27	-31.91	3.8797
27	-32.71	3.8797
27	-33.51	3.8797
27	-34.31	3.8797
27	-35.11	3.8797
27	-35.91	3.8797
27	-36.71	3.8797
27	-37.51	3.88
27	-38.31	3.92659
27	-39.11	4.15714
27	-39.91	4.20794
27	-40.71	4.21373
27	-41.51	4.25104
27	-42.31	4.38454
27	-43.11	4.51261
27	-43.91	4.56156
27	-44.71	4.58118
27	-45.51	4.5854
27	-46.31	4.58577
27	-47.11	4.57856
27	-47.91	4.53755
27	-48.71	4.4922
27	-49.51	4.48789
27	-50.31	4.48646
27	-51.11	4.48178
27	-51.91	4.47898
27	-52.71	4.48781
27	-53.51	4.53821
27	-54.31	4.57221
27	-55.11	4.57608
27	-55.91	4.57627
27	-56.71	4.57704
27	-57.51	4.57738
27	-58.31	4.57747
27	-59.11	4.57728
27	-59.91	4.57674
27	-60.71	4.57533
27	-61.51	4.57287
27	-62.31	4.56784
27	-63.11	4.55871
27	-63.91	4.54722
27	-64.71	4.54115
27	-65.51	4.54577
27	-66.31	4.55154
27	-67.11	4.50144
27	-67.91	4.36525
27	-68.71	4.35998
27	-69.51	4.45902
27	-70.31	4.52674
27	-71.11	4.53999
27	-71.91	4.54811
27	-72.71	4.54294
27	-73.51	4.53211
27	-74.31	4.53029
27	-75.11	4.53709
27	-75.91	4.54908
27	-76.71	4.54552
27	-77.51	4.52176
27	-78.31	4.47303
69	0.779	2.95625
69	-0.021	2.95126
69	-0.821	3.5239
69	-1.621	3.5099
69	-2.421	3.68
69	-3.221	3.89125
69	-4.021	3.89126
69	-4.821	3.89126
69	-5.621	3.89126
69	-6.421	3.89046
69	-7.221	3.85955
69	-8.021	3.4232
69	-8.821	3.52368
69	-9.621	3.67164
69	-10.421	3.66865
69	-11.221	3.51284
69	-12.021	3.36765
69	-12.821	3.36624
69	-13.621	3.36617
69	-14.421	3.37185
69	-15.221	3.37696
69	-16.021	3.36938
69	-16.821	3.36938
69	-17.621	3.36938
69	-18.421	3.36938
69	-19.221	3.36938
69	-20.021	3.36938
69	-20.821	3.36938
69	-21.621	3.50041
69	-22.421	3.66514
69	-23.221	3.67656
69	-24.021	3.69442
69	-24.821	3.8021
69	-25.621	3.81017
69	-26.421	3.7679
69	-27.221	3.74216
69	-28.021	3.7378
69	-28.821	3.81671
69	-29.621	4.00578
69	-30.421	4.12156
69	-31.221	4.14366
69	-32.021	4.14464
69	-32.821	4.14566
69	-33.621	4.19787
69	-34.421	4.22663
69	-35.221	4.22773
69	-36.021	4.24162
69	-36.821	4.29448
69	-37.621	4.39878
69	-38.421	4.47666
69	-39.221	4.50926
69	-40.021	4.50658
69	-40.821	4.49957
69	-41.621	4.50179
69	-42.421	4.51489
69	-43.221	4.53886
69	-44.021	4.54666
69	-44.821	4.52824
69	-45.621	4.49764
69	-46.421	4.47958
69	-47.221	4.46718
69	-48.021	4.43429
69	-48.821	4.36472
69	-49.621	4.34227
69	-50.421	4.34298
69	-51.221	4.35745
69	-52.021	4.40187
69	-52.821	4.43983
69	-53.621	4.47843
69	-54.421	4.49883
69	-55.221	4.51132
69	-56.021	4.52757
69	-56.821	4.54537
69	-57.621	4.5591
69	-58.421	4.55934
69	-59.221	4.54854
69	-60.021	4.53906
69	-60.821	4.53302
69	-61.621	4.53483
69	-62.421	4.54774
69	-63.221	4.56547
69	-64.021	4.57452
69	-64.821	4.50061
69	-65.621	4.3854
69	-66.421	4.37224
69	-67.221	4.38854
69	-68.021	4.44119
69	-68.821	4.48387
69	-69.621	4.49324
69	-70.421	4.48518
69	-71.221	4.47442
69	-72.021	4.46698
69	-72.821	4.4668
69	-73.621	4.4592
69	-74.421	4.43642
69	-75.221	4.42641
69	-76.021	4.44912
69	-76.821	4.48031
69	-77.621	4.48041
69	-78.421	4.3937
131	0.391	2.95572
131	-0.409	2.94826
131	-1.209	3.04325
131	-2.009	3.59159
131	-2.809	3.58382
131	-3.609	3.29422
131	-4.409	3.30561
131	-5.209	3.58876
131	-6.009	3.59833
131	-6.809	3.54247
131	-7.609	3.48564
131	-8.409	3.48835
131	-9.209	4.18635
131	-10.009	4.19783
131	-10.809	4.19783
131	-11.609	4.19783
131	-12.409	4.19783
131	-13.209	4.19783
131	-14.009	4.19783
131	-14.809	4.19783
131	-15.609	4.12249
131	-16.409	4.06067
131	-17.209	4.06038
131	-18.009	3.9963
131	-18.809	3.94239
131	-19.609	4.01924
131	-20.409	4.01748
131	-21.209	4.01529
131	-22.009	4.01287
131	-22.809	4.03377
131	-23.609	4.03916
131	-24.409	4.03975
131	-25.209	4.03918
131	-26.009	4.03914
131	-26.809	4.03973
131	-27.609	4.1524
131	-28.409	4.20882
131	-29.209	4.2871
131	-30.009	4.32805
131	-30.809	4.42053
131	-31.609	4.46832
131	-32.409	4.46832
131	-33.209	4.46832
131	-34.009	4.46837
131	-34.809	4.48037
131	-35.609	4.48242
131	-36.409	4.48235
131	-37.209	4.47746
131	-38.009	4.38586
131	-38.809	4.41187
131	-39.609	4.45
131	-40.409	4.57895
131	-41.209	4.58848
131	-42.009	4.53743
131	-42.809	4.48204
131	-43.609	4.49732
131	-44.409	4.58455
131	-45.209	4.59319
131	-46.009	4.52708
131	-46.809	4.43469
131	-47.609	4.37557
131	-48.409	4.37607
131	-49.209	4.38433
131	-50.009	4.40925
131	-50.809	4.41974
131	-51.609	4.42128
131	-52.409	4.42534
131	-53.209	4.43643
131	-54.009	4.44955
131	-54.809	4.45565
131	-55.609	4.48191
131	-56.409	4.49488
131	-57.209	4.48506
131	-58.009	4.49311
131	-58.809	4.49915
131	-59.609	4.51865
131	-60.409	4.58301
131	-61.209	4.64561
131	-62.009	4.64999
131	-62.809	4.64475
131	-63.609	4.57869
131	-64.409	4.54998
131	-65.209	4.54138
131	-66.009	4.53679
131	-66.809	4.54057
131	-67.609	4.43633
131	-68.409	4.42383
131	-69.209	4.37577
131	-70.009	4.34864
131	-70.809	4.29117
131	-71.609	4.33316
131	-72.409	4.42622
131	-73.209	4.42982
131	-74.009	4.50518
131	-74.809	4.60275
131	-75.609	4.67694
131	-76.409	4.62052
131	-77.209	4.53963
131	-78.009	4.37689
131	-78.809	4.18059
155	0.416	2.66262
155	-0.384	2.65871
155	-1.184	2.67799
155	-1.984	3.01791
155	-2.784	3.18758
155	-3.584	3.26997
155	-4.384	3.34005
155	-5.184	3.37211
155	-5.984	3.39527
155	-6.784	3.41928
155	-7.584	3.41178
155	-8.384	3.43363
155	-9.184	3.45961
155	-9.984	3.57257
155	-10.784	3.66565
155	-11.584	3.6658
155	-12.384	3.66568
155	-13.184	3.66605
155	-13.984	3.66576
155	-14.784	3.66576
155	-15.584	3.66576
155	-16.384	3.66576
155	-17.184	3.62072
155	-17.984	3.57045
155	-18.784	3.57045
155	-19.584	3.57045
155	-20.384	3.57242
155	-21.184	3.61134
155	-21.984	3.61122
155	-22.784	3.6114
155	-23.584	3.61208
155	-24.384	3.60674
155	-25.184	3.6061
155	-25.984	3.6061
155	-26.784	3.60611
155	-27.584	3.60611
155	-28.384	3.61406
155	-29.184	3.66646
155	-29.984	3.68957
155	-30.784	3.71763
155	-31.584	3.85329
155	-32.384	4.04344
155	-33.184	4.11969
155	-33.984	4.23
155	-34.784	4.23288
155	-35.584	4.23915
155	-36.384	4.23642
155	-37.184	4.22709
155	-37.984	4.21986
155	-38.784	4.25508
155	-39.584	4.33936
155	-40.384	4.41372
155	-41.184	4.4404
155	-41.984	4.44685
155	-42.784	4.45626
155	-43.584	4.48405
155	-44.384	4.50695
155	-45.184	4.51688
155	-45.984	4.53208
155	-46.784	4.54055
155	-47.584	4.54521
155	-48.384	4.54476
155	-49.184	4.53262
155	-49.984	4.48169
155	-50.784	4.41293
155	-51.584	4.41376
155	-52.384	4.42178
155	-53.184	4.44226
155	-53.984	4.47281
155	-54.784	4.48935
155	-55.584	4.51114
155	-56.384	4.578
155	-57.184	4.68795
155	-57.984	4.72303
155	-58.784	4.72932
155	-59.584	4.73228
155	-60.384	4.7335
155	-61.184	4.73504
155	-61.984	4.73591
155	-62.784	4.73625
155	-63.584	4.73636
155	-64.384	4.73614
155	-65.184	4.72212
155	-65.984	4.58529
155	-66.784	4.20907
155	-67.584	4.06718
155	-68.384	4.10754
155	-69.184	4.10381
155	-69.984	4.10265
155	-70.784	4.10241
155	-71.584	4.08595
155	-72.384	4.07252
155	-73.184	4.08436
155	-73.984	4.11243
155	-74.784	4.12182
155	-75.584	4.11867
155	-76.384	4.09525
155	-77.184	4.09526
155	-77.984	4.11913
155	-78.784	4.61627
195	1.322	3.32888
195	0.522	3.45936
195	-0.278	3.57032
195	-1.078	3.58419
195	-1.878	3.52377
195	-2.678	3.4934
195	-3.478	3.62092
195	-4.278	3.73792
195	-5.078	3.73641
195	-5.878	3.66704
195	-6.678	3.50398
195	-7.478	3.46165
195	-8.278	3.12549
195	-9.078	3.10982
195	-9.878	3.10982
195	-10.678	3.38449
195	-11.478	3.53149
195	-12.278	3.5283
195	-13.078	3.48713
195	-13.878	3.4878
195	-14.678	3.78911
195	-15.478	3.84013
195	-16.278	3.84013
195	-17.078	3.84013
195	-17.878	3.84013
195	-18.678	3.84013
195	-19.478	3.84013
195	-20.278	3.84013
195	-21.078	3.84013
195	-21.878	3.83965
195	-22.678	3.83971
195	-23.478	3.8448
195	-24.278	3.85882
195	-25.078	3.86123
195	-25.878	3.85935
195	-26.678	3.88525
195	-27.478	3.90754
195	-28.278	3.93053
195	-29.078	3.93888
195	-29.878	3.94587
195	-30.678	3.95515
195	-31.478	3.97579
195	-32.278	4.00715
195	-33.078	4.04286
195	-33.878	4.09502
195	-34.678	4.10102
195	-35.478	4.10097
195	-36.278	4.10097
195	-37.078	4.10087
195	-37.878	4.10117
195	-38.678	4.10363
195	-39.478	4.1178
195	-40.278	4.17567
195	-41.078	4.28873
195	-41.878	4.38335
195	-42.678	4.41824
195	-43.478	4.43809
195	-44.278	4.444
195	-45.078	4.44254
195	-45.878	4.45325
195	-46.678	4.47854
195	-47.478	4.52397
195	-48.278	4.55345
195	-49.078	4.56031
195	-49.878	4.56589
195	-50.678	4.56904
195	-51.478	4.57749
195	-52.278	4.58978
195	-53.078	4.58291
195	-53.878	4.56956
195	-54.678	4.55251
195	-55.478	4.539
195	-56.278	4.52932
195	-57.078	4.52642
195	-57.878	4.52746
195	-58.678	4.53579
195	-59.478	4.54568
195	-60.278	4.53901
195	-61.078	4.49383
195	-61.878	4.45037
195	-62.678	4.43505
195	-63.478	4.46
195	-64.278	4.55767
195	-65.078	4.46435
195	-65.878	4.36743
195	-66.678	4.45554
195	-67.478	4.51417
195	-68.278	4.56302
195	-69.078	4.56741
195	-69.878	4.55413
195	-70.678	4.51966
195	-71.478	4.46268
195	-72.278	4.44461
195	-73.078	4.4506
195	-73.878	4.47624
195	-74.678	4.52829
195	-75.478	4.55233
195	-76.278	4.54838
195	-77.078	4.42396
195	-77.878	4.1959
202	0.988	3.46233
202	0.188	3.4134
202	-0.612	3.38259
202	-1.412	3.41894
202	-2.212	3.59299
202	-3.012	3.60366
202	-3.812	3.5565
202	-4.612	3.40552
202	-5.412	3.39911
202	-6.212	3.39909
202	-7.012	3.40586
202	-7.812	3.41762
202	-8.612	3.39705
202	-9.412	3.38815
202	-10.212	3.42844
202	-11.012	3.50042
202	-11.812	3.66339
202	-12.612	3.79348
202	-13.412	3.79501
202	-14.212	3.79316
202	-15.012	3.74852
202	-15.812	3.52862
202	-16.612	3.4974
202	-17.412	3.57564
202	-18.212	3.61061
202	-19.012	3.61061
202	-19.812	3.6112
202	-20.612	3.63695
202	-21.412	3.65401
202	-22.212	3.6831
202	-23.012	3.74215
202	-23.812	3.762
202	-24.612	3.74097
202	-25.412	3.71951
202	-26.212	3.70926
202	-27.012	3.7022
202	-27.812	3.7392
202	-28.612	3.82144
202	-29.412	3.96435
202	-30.212	3.98465
202	-31.012	3.97797
202	-31.812	3.97385
202	-32.612	3.97544
202	-33.412	3.98249
202	-34.212	3.99471
202	-35.012	4.03009
202	-35.812	4.08453
202	-36.612	4.12533
202	-37.412	4.17413
202	-38.212	4.25603
202	-39.012	4.28814
202	-39.812	4.34045
202	-40.612	4.36593
202	-41.412	4.40515
202	-42.212	4.4327
202	-43.012	4.47425
202	-43.812	4.51481
202	-44.612	4.53769
202	-45.412	4.5402
202	-46.212	4.55073
202	-47.012	4.56469
202	-47.812	4.60047
202	-48.612	4.62999
202	-49.412	4.60978
202	-50.212	4.63615
202	-51.012	4.68753
202	-51.812	4.74096
202	-52.612	4.79035
202	-53.412	4.80264
202	-54.212	4.80833
202	-55.012	4.81007
202	-55.812	4.81057
202	-56.612	4.80972
202	-57.412	4.80607
202	-58.212	4.80447
202	-59.012	4.80365
202	-59.812	4.80289
202	-60.612	4.78759
202	-61.412	4.74744
202	-62.212	4.70494
202	-63.012	4.69204
202	-63.812	4.62928
202	-64.612	4.49925
202	-65.412	4.44307
202	-66.212	4.39119
202	-67.012	4.3824
202	-67.812	4.73274
202	-68.612	4.82237
202	-69.412	4.82194
202	-70.212	4.81812
202	-71.012	4.80618
202	-71.812	4.78664
202	-72.612	4.71855
202	-73.412	4.61329
202	-74.212	4.5889
202	-75.012	4.50694
202	-75.812	4.41925
202	-76.612	4.41597
202	-77.412	4.41304
202	-78.212	4.41251
210	1.431	3.46243
210	0.631	3.71441
210	-0.169	4.00897
210	-0.969	4.00897
210	-1.769	4.00897
210	-2.569	4.00897
210	-3.369	4.00897
210	-4.169	4.00897
210	-4.969	3.91675
210	-5.769	3.6608
210	-6.569	3.85208
210	-7.369	3.91007
210	-8.169	3.90746
210	-8.969	3.8502
210	-9.769	3.68222
210	-10.569	3.62822
210	-11.369	3.63479
210	-12.169	3.63674
210	-12.969	3.66325
210	-13.769	3.71564
210	-14.569	3.71299
210	-15.369	3.70524
210	-16.169	3.46733
210	-16.969	3.36793
210	-17.769	3.32283
210	-18.569	3.17232
210	-19.369	3.16061
210	-20.169	3.17745
210	-20.969	3.14389
210	-21.769	2.91732
210	-22.569	2.86614
210	-23.369	2.9025
210	-24.169	3.02084
210	-24.969	3.29519
210	-25.769	3.38553
210	-26.569	3.45619
210	-27.369	3.45615
210	-28.169	3.45615
210	-28.969	3.45615
210	-29.769	3.45615
210	-30.569	3.45615
210	-31.369	3.45615
210	-32.169	3.45347
210	-32.969	3.45298
210	-33.769	3.45298
210	-34.569	3.45326
210	-35.369	3.46184
210	-36.169	3.50236
210	-36.969	3.55495
210	-37.769	3.58833
210	-38.569	3.58817
210	-39.369	3.58852
210	-40.169	3.58809
210	-40.969	3.58789
210	-41.769	3.58791
210	-42.569	3.58775
210	-43.369	3.5546
210	-44.169	3.58891
210	-44.969	3.58893
210	-45.769	3.58893
210	-46.569	3.58893
210	-47.369	3.58893
210	-48.169	3.5955
210	-48.969	3.59674
210	-49.769	3.62996
210	-50.569	3.66234
210	-51.369	3.6997
210	-52.169	3.67956
210	-52.969	3.65557
210	-53.769	3.59331
210	-54.569	3.59931
210	-55.369	3.60192
210	-56.169	3.60162
210	-56.969	3.65491
210	-57.769	3.97253
210	-58.569	4.04937
210	-59.369	4.06302
210	-60.169	4.07074
210	-60.969	4.09185
210	-61.769	3.94908
210	-62.569	4.18286
210	-63.369	4.24904
210	-64.169	4.23688
210	-64.969	4.14202
210	-65.769	4.09368
210	-66.569	4.098
210	-67.369	4.07842
210	-68.169	4.08823
210	-68.969	4.10031
210	-69.769	4.09365
210	-70.569	4.04929
210	-71.369	3.98435
210	-72.169	3.98878
210	-72.969	3.98845
210	-73.769	3.97664
210	-74.569	3.94567
210	-75.369	3.9362
210	-76.169	3.94171
210	-76.969	3.9223
210	-77.769	3.77448
242	1.338	3.00195
242	0.538	2.93445
242	-0.262	2.93445
242	-1.062	3.66218
242	-1.862	3.70683
242	-2.662	3.71014
242	-3.462	3.67276
242	-4.262	3.53101
242	-5.062	3.53616
242	-5.862	3.56297
242	-6.662	3.7674
242	-7.462	3.76447
242	-8.262	3.75567
242	-9.062	3.6045
242	-9.862	3.53234
242	-10.662	3.54995
242	-11.462	3.57258
242	-12.262	3.61042
242	-13.062	3.60544
242	-13.862	3.60579
242	-14.662	3.6141
242	-15.462	3.6183
242	-16.262	3.60958
242	-17.062	3.61693
242	-17.862	3.63046
242	-18.662	3.44087
242	-19.462	3.27745
242	-20.262	3.27327
242	-21.062	3.23076
242	-21.862	3.23576
242	-22.662	3.24976
242	-23.462	3.28842
242	-24.262	3.33071
242	-25.062	3.36251
242	-25.862	3.37149
242	-26.662	3.37381
242	-27.462	3.84495
242	-28.262	3.98789
242	-29.062	4.10473
242	-29.862	4.20123
242	-30.662	4.21504
242	-31.462	4.22159
242	-32.262	4.21935
242	-33.062	4.21188
242	-33.862	4.18945
242	-34.662	4.1002
242	-35.462	4.06105
242	-36.262	4.05736
242	-37.062	4.07815
242	-37.862	4.20944
242	-38.662	4.21542
242	-39.462	4.12351
242	-40.262	3.77319
242	-41.062	3.51215
242	-41.862	3.45582
242	-42.662	3.50464
242	-43.462	3.65236
242	-44.262	3.66697
242	-45.062	3.68044
242	-45.862	3.86816
242	-46.662	3.8728
242	-47.462	3.87515
242	-48.262	3.87867
242	-49.062	3.87889
242	-49.862	3.88734
242	-50.662	3.94786
242	-51.462	3.99724
242	-52.262	3.99502
242	-53.062	3.99097
242	-53.862	3.92158
242	-54.662	3.68285
242	-55.462	3.67934
242	-56.262	3.67998
242	-57.062	3.67991
242	-57.862	3.68034
242	-58.662	3.77609
242	-59.462	3.95111
242	-60.262	3.94712
242	-61.062	3.89719
242	-61.862	3.68572
242	-62.662	3.5633
242	-63.462	3.56326
242	-64.262	3.56294
242	-65.062	3.56291
242	-65.862	3.611
242	-66.662	3.94195
242	-67.462	4.06293
242	-68.262	4.0794
242	-69.062	4.07558
242	-69.862	4.06781
242	-70.662	4.10874
242	-71.462	4.18659
242	-72.262	4.20259
242	-73.062	4.20715
242	-73.862	4.2098
242	-74.662	4.21111
242	-75.462	4.17335
242	-76.262	4.04893
242	-77.062	4.02452
242	-77.862	3.51367
290	1.246	2.33087
290	0.446	2.33083
290	-0.354	2.85312
290	-1.154	2.95837
290	-1.954	3.29915
290	-2.754	3.53602
290	-3.554	3.57098
290	-4.354	3.58131
290	-5.154	3.51069
290	-5.954	3.41295
290	-6.754	3.3981
290	-7.554	3.39132
290	-8.354	3.41003
290	-9.154	3.85667
290	-9.954	3.90824
290	-10.754	3.91951
290	-11.554	3.92034
290	-12.354	3.92034
290	-13.154	3.9167
290	-13.954	3.77821
290	-14.754	3.49812
290	-15.554	3.25702
290	-16.354	3.17432
290	-17.154	3.13485
290	-17.954	3.13175
290	-18.754	3.13153
290	-19.554	3.17706
290	-20.354	3.18562
290	-21.154	3.18562
290	-21.954	3.18562
290	-22.754	3.18562
290	-23.554	3.18562
290	-24.354	3.18562
290	-25.154	3.18562
290	-25.954	3.18562
290	-26.754	3.18562
290	-27.554	3.18562
290	-28.354	3.18562
290	-29.154	3.18562
290	-29.954	3.18562
290	-30.754	3.18562
290	-31.554	3.18562
290	-32.354	3.18562
290	-33.154	3.18562
290	-33.954	3.19713
290	-34.754	3.37569
290	-35.554	3.37936
290	-36.354	3.37936
290	-37.154	3.37936
290	-37.954	3.37936
290	-38.754	3.37936
290	-39.554	3.37936
290	-40.354	3.37936
290	-41.154	3.37936
290	-41.954	3.37936
290	-42.754	3.37936
290	-43.554	3.56633
290	-44.354	3.63347
290	-45.154	3.7605
290	-45.954	3.79262
290	-46.754	3.79262
290	-47.554	3.81094
290	-48.354	4.08927
290	-49.154	4.16109
290	-49.954	4.19394
290	-50.754	4.23537
290	-51.554	4.25033
290	-52.354	4.26268
290	-53.154	4.27548
290	-53.954	4.31181
290	-54.754	4.36931
290	-55.554	4.42406
290	-56.354	4.4302
290	-57.154	4.31141
290	-57.954	4.05777
290	-58.754	4.15105
290	-59.554	4.24025
290	-60.354	4.25801
290	-61.154	4.27963
290	-61.954	4.28298
290	-62.754	4.25357
290	-63.554	4.18869
290	-64.354	4.22883
290	-65.154	4.25497
290	-65.954	4.30244
290	-66.754	4.33892
290	-67.554	4.33465
290	-68.354	4.3211
290	-69.154	4.3094
290	-69.954	4.25763
290	-70.754	4.22476
290	-71.554	4.21994
290	-72.354	4.21124
290	-73.154	4.20357
290	-73.954	4.19774
290	-74.754	4.23539
290	-75.554	4.28061
290	-76.354	4.24075
290	-77.154	4.185
290	-77.954	4.17291
318	1.754	2.9964
318	0.954	3.22432
318	0.154	3.37169
318	-0.646	3.39917
318	-1.446	3.39917
318	-2.246	3.39917
318	-3.046	3.41608
318	-3.846	3.50955
318	-4.646	3.55736
318	-5.446	3.35796
318	-6.246	3.31095
318	-7.046	3.33746
318	-7.846	3.48966
318	-8.646	3.53949
318	-9.446	3.5118
318	-10.246	3.51398
318	-11.046	3.50419
318	-11.846	3.36054
318	-12.646	3.35767
318	-13.446	3.48793
318	-14.246	3.50992
318	-15.046	3.37912
318	-15.846	3.30724
318	-16.646	3.48538
318	-17.446	3.66325
318	-18.246	3.6455
318	-19.046	3.3123
318	-19.846	3.30165
318	-20.646	3.27946
318	-21.446	3.22758
318	-22.246	3.24504
318	-23.046	3.12451
318	-23.846	2.95989
318	-24.646	3.02848
318	-25.446	2.98726
318	-26.246	2.99901
318	-27.046	3.07945
318	-27.846	3.0854
318	-28.646	3.05307
318	-29.446	3.04047
318	-30.246	3.11578
318	-31.046	3.33904
318	-31.846	3.48369
318	-32.646	3.54881
318	-33.446	3.5498
318	-34.246	3.56761
318	-35.046	3.71504
318	-35.846	3.86256
318	-36.646	3.87502
318	-37.446	3.88044
318	-38.246	3.89681
318	-39.046	3.91301
318	-39.846	3.9856
318	-40.646	4.03868
318	-41.446	4.07592
318	-42.246	4.06724
318	-43.046	4.13499
318	-43.846	4.17522
318	-44.646	4.22595
318	-45.446	4.23168
318	-46.246	4.23168
318	-47.046	4.23338
318	-47.846	4.23331
318	-48.646	4.23498
318	-49.446	4.24476
318	-50.246	4.24517
318	-51.046	4.19474
318	-51.846	4.17061
318	-52.646	4.14966
318	-53.446	4.12747
318	-54.246	4.12474
318	-55.046	4.12473
318	-55.846	4.12767
318	-56.646	4.13098
318	-57.446	4.19846
318	-58.246	4.15584
318	-59.046	4.12556
318	-59.846	4.17968
318	-60.646	4.20865
318	-61.446	4.23565
318	-62.246	4.25274
318	-63.046	4.26941
318	-63.846	4.27175
318	-64.646	4.25764
318	-65.446	4.23593
318	-66.246	4.21208
318	-67.046	4.18016
318	-67.846	4.15102
318	-68.646	4.16892
318	-69.446	4.17633
318	-70.246	4.10956
318	-71.046	4.0678
318	-71.846	4.09783
318	-72.646	4.21918
318	-73.446	4.25679
318	-74.246	4.27534
318	-75.046	4.31809
318	-75.846	4.32537
318	-76.646	4.29639
318	-77.446	4.10406
343	1.42	2.64879
343	0.62	2.97525
343	-0.18	2.67125
343	-0.98	2.67118
343	-1.78	2.67118
343	-2.58	2.77113
343	-3.38	2.86628
343	-4.18	2.98557
343	-4.98	3.00402
343	-5.78	3.02127
343	-6.58	3.65469
343	-7.38	3.65225
343	-8.18	3.52561
343	-8.98	3.53886
343	-9.78	3.67799
343	-10.58	3.61049
343	-11.38	3.53683
343	-12.18	3.6876
343	-12.98	3.72197
343	-13.78	3.66189
343	-14.58	3.59128
343	-15.38	3.58026
343	-16.18	3.58791
343	-16.98	3.61949
343	-17.78	3.57228
343	-18.58	3.36577
343	-19.38	3.35074
343	-20.18	3.4813
343	-20.98	3.43024
343	-21.78	3.06427
343	-22.58	3.01222
343	-23.38	3.05881
343	-24.18	3.3037
343	-24.98	3.33993
343	-25.78	3.33994
343	-26.58	3.33609
343	-27.38	3.2416
343	-28.18	3.01562
343	-28.98	2.99573
343	-29.78	2.99573
343	-30.58	2.99573
343	-31.38	3.0031
343	-32.18	3.44115
343	-32.98	3.72336
343	-33.78	3.72991
343	-34.58	3.7741
343	-35.38	3.80083
343	-36.18	3.80789
343	-36.98	3.7643
343	-37.78	3.64935
343	-38.58	3.6816
343	-39.38	3.84927
343	-40.18	3.93395
343	-40.98	3.8332
343	-41.78	3.72851
343	-42.58	3.6988
343	-43.38	3.81064
343	-44.18	3.84105
343	-44.98	3.96336
343	-45.78	4.09221
343	-46.58	4.24874
343	-47.38	4.2585
343	-48.18	4.26288
343	-48.98	4.26145
343	-49.78	4.24797
343	-50.58	4.25021
343	-51.38	4.26203
343	-52.18	4.2672
343	-52.98	4.29583
343	-53.78	4.3342
343	-54.58	4.30596
343	-55.38	4.20137
343	-56.18	4.09497
343	-56.98	4.17781
343	-57.78	4.13545
343	-58.58	3.9844
343	-59.38	4.04604
343	-60.18	4.1162
343	-60.98	4.06042
343	-61.78	4.01256
343	-62.58	4.11018
343	-63.38	4.19591
343	-64.18	4.27097
343	-64.98	4.25458
343	-65.78	4.27067
343	-66.58	4.31545
343	-67.38	4.34654
343	-68.18	4.30515
343	-68.98	4.21467
343	-69.78	4.2066
343	-70.58	4.3168
343	-71.38	4.24489
343	-72.18	4.1065
343	-72.98	4.0482
343	-73.78	4.13645
343	-74.58	4.17293
343	-75.38	4.18903
343	-76.18	4.19381
343	-76.98	4.18121
343	-77.78	4.47098
346	1.314	2.37573
346	0.514	2.82028
346	-0.286	2.88622
346	-1.086	2.89027
346	-1.886	2.89056
346	-2.686	2.96711
346	-3.486	3.59274
346	-4.286	3.42621
346	-5.086	3.20988
346	-5.886	3.19765
346	-6.686	3.2112
346	-7.486	3.56829
346	-8.286	3.58153
346	-9.086	3.58149
346	-9.886	3.58699
346	-10.686	3.58684
346	-11.486	3.61624
346	-12.286	3.65466
346	-13.086	3.6559
346	-13.886	3.65327
346	-14.686	3.66207
346	-15.486	3.65761
346	-16.286	3.44905
346	-17.086	3.26513
346	-17.886	3.25803
346	-18.686	3.25918
346	-19.486	3.30097
346	-20.286	3.40698
346	-21.086	3.32324
346	-21.886	3.1631
346	-22.686	3.14801
346	-23.486	3.15224
346	-24.286	3.24639
346	-25.086	3.41057
346	-25.886	3.41973
346	-26.686	3.39534
346	-27.486	2.97081
346	-28.286	2.99505
346	-29.086	3.10335
346	-29.886	3.29731
346	-30.686	3.48925
346	-31.486	3.62972
346	-32.286	3.66571
346	-33.086	3.67874
346	-33.886	3.71808
346	-34.686	3.72788
346	-35.486	3.72735
346	-36.286	3.70973
346	-37.086	3.6222
346	-37.886	3.59241
346	-38.686	3.58919
346	-39.486	3.59624
346	-40.286	3.6215
346	-41.086	3.68044
346	-41.886	3.74856
346	-42.686	3.78909
346	-43.486	3.88898
346	-44.286	3.89209
346	-45.086	3.89311
346	-45.886	3.92191
346	-46.686	4.15422
346	-47.486	4.21263
346	-48.286	4.2811
346	-49.086	4.29491
346	-49.886	4.25817
346	-50.686	4.208
346	-51.486	4.27091
346	-52.286	4.32531
346	-53.086	4.33081
346	-53.886	4.28563
346	-54.686	4.26489
346	-55.486	4.26458
346	-56.286	4.28162
346	-57.086	4.29799
346	-57.886	4.27742
346	-58.686	4.14121
346	-59.486	3.98156
346	-60.286	3.93474
346	-61.086	3.94104
346	-61.886	3.94545
346	-62.686	3.93513
346	-63.486	3.90926
346	-64.286	3.91957
346	-65.086	4.01176
346	-65.886	4.11098
346	-66.686	4.18054
346	-67.486	4.23062
346	-68.286	4.22723
346	-69.086	4.2929
346	-69.886	4.32242
346	-70.686	4.27904
346	-71.486	4.27259
346	-72.286	4.34221
346	-73.086	4.39034
346	-73.886	4.38741
346	-74.686	4.37607
346	-75.486	4.37344
346	-76.286	4.30751
346	-77.086	4.20262
346	-77.886	4.05933
384	1.595	2.64298
384	0.795	2.64657
384	-0.005	2.95799
384	-0.805	2.99672
384	-1.605	3.06022
384	-2.405	3.51163
384	-3.205	3.48283
384	-4.005	3.37468
384	-4.805	3.35576
384	-5.605	3.40631
384	-6.405	3.78926
384	-7.205	3.80863
384	-8.005	3.80637
384	-8.805	3.80209
384	-9.605	3.79824
384	-10.405	3.75588
384	-11.205	3.8004
384	-12.005	3.82064
384	-12.805	3.81369
384	-13.605	3.72894
384	-14.405	3.71158
384	-15.205	3.71084
384	-16.005	3.68251
384	-16.805	3.44626
384	-17.605	3.40085
384	-18.405	3.40358
384	-19.205	3.57092
384	-20.005	3.65835
384	-20.805	3.65759
384	-21.605	3.65759
384	-22.405	3.65759
384	-23.205	3.65759
384	-24.005	3.65759
384	-24.805	3.65759
384	-25.605	3.65759
384	-26.405	3.65759
384	-27.205	3.65759
384	-28.005	3.65759
384	-28.805	3.70389
384	-29.605	3.7055
384	-30.405	3.7055
384	-31.205	3.7055
384	-32.005	3.70651
384	-32.805	3.70696
384	-33.605	3.70696
384	-34.405	3.70685
384	-35.205	3.70658
384	-36.005	3.70662
384	-36.805	3.70662
384	-37.605	3.70165
384	-38.405	3.69543
384	-39.205	3.71184
384	-40.005	3.80109
384	-40.805	3.8697
384	-41.605	3.95059
384	-42.405	3.98222
384	-43.205	4.04247
384	-44.005	4.13429
384	-44.805	4.20225
384	-45.605	4.21413
384	-46.405	4.21413
384	-47.205	4.21413
384	-48.005	4.21353
384	-48.805	4.21385
384	-49.605	4.21175
384	-50.405	4.20653
384	-51.205	4.20347
384	-52.005	4.2028
384	-52.805	4.20527
384	-53.605	4.21658
384	-54.405	4.23597
384	-55.205	4.2695
384	-56.005	4.29702
384	-56.805	4.32453
384	-57.605	4.33907
384	-58.405	4.34983
384	-59.205	4.39173
384	-60.005	4.43017
384	-60.805	4.46563
384	-61.605	4.48614
384	-62.405	4.36598
384	-63.205	4.23377
384	-64.005	4.03071
384	-64.805	3.85184
384	-65.605	3.80226
384	-66.405	3.80217
384	-67.205	3.80216
384	-68.005	3.80216
384	-68.805	3.87616
384	-69.605	3.96863
384	-70.405	4.11453
384	-71.205	4.12234
384	-72.005	4.1123
384	-72.805	4.10658
384	-73.605	4.10599
384	-74.405	4.10828
384	-75.205	4.1187
384	-76.005	4.13658
384	-76.805	4.15135
384	-77.605	4.13185
402	0.996	3.32168
402	0.196	3.32795
402	-0.604	3.32829
402	-1.404	3.33812
402	-2.204	3.25601
402	-3.004	3.42781
402	-3.804	3.48107
402	-4.604	3.47937
402	-5.404	3.48017
402	-6.204	3.48006
402	-7.004	3.44895
402	-7.804	3.39302
402	-8.604	3.38323
402	-9.404	3.52042
402	-10.204	3.69355
402	-11.004	3.71915
402	-11.804	3.71817
402	-12.604	3.70478
402	-13.404	3.56245
402	-14.204	3.64916
402	-15.004	3.63631
402	-15.804	3.47774
402	-16.604	3.35332
402	-17.404	3.2799
402	-18.204	3.28389
402	-19.004	3.30641
402	-19.804	3.35137
402	-20.604	3.59742
402	-21.404	3.64365
402	-22.204	3.51633
402	-23.004	3.36263
402	-23.804	3.35729
402	-24.604	3.34725
402	-25.404	3.33139
402	-26.204	3.32826
402	-27.004	3.33417
402	-27.804	3.39049
402	-28.604	3.39099
402	-29.404	3.39141
402	-30.204	3.3914
402	-31.004	3.3914
402	-31.804	3.39485
402	-32.604	3.39485
402	-33.404	3.46931
402	-34.204	3.52331
402	-35.004	3.63822
402	-35.804	3.64247
402	-36.604	3.64399
402	-37.404	3.64327
402	-38.204	3.64329
402	-39.004	3.64319
402	-39.804	3.64296
402	-40.604	3.64401
402	-41.404	3.65229
402	-42.204	3.65253
402	-43.004	3.67987
402	-43.804	3.68581
402	-44.604	3.68558
402	-45.404	3.74014
402	-46.204	3.82353
402	-47.004	3.92747
402	-47.804	3.93726
402	-48.604	3.95072
402	-49.404	3.95058
402	-50.204	3.9959
402	-51.004	4.04963
402	-51.804	4.10951
402	-52.604	4.1078
402	-53.404	4.08193
402	-54.204	4.06337
402	-55.004	4.05253
402	-55.804	4.06252
402	-56.604	4.0666
402	-57.404	4.08088
402	-58.204	4.12186
402	-59.004	4.13685
402	-59.804	4.13975
402	-60.604	4.12543
402	-61.404	4.09678
402	-62.204	4.07948
402	-63.004	4.08061
402	-63.804	4.0831
402	-64.604	4.05811
402	-65.404	4.01232
402	-66.204	4.00003
402	-67.004	4.01136
402	-67.804	4.12195
402	-68.604	4.22116
402	-69.404	4.19169
402	-70.204	4.16147
402	-71.004	4.12505
402	-71.804	4.09189
402	-72.604	4.16337
402	-73.404	4.27829
402	-74.204	4.34984
402	-75.004	4.40288
402	-75.804	4.46994
402	-76.604	4.58536
402	-77.404	4.63737
402	-78.204	4.56074
438	1.878	3.42403
438	1.078	3.34135
438	0.278	3.52794
438	-0.522	4.06514
438	-1.322	4.06514
438	-2.122	4.06514
438	-2.922	3.99056
438	-3.722	3.79485
438	-4.522	4.02227
438	-5.322	4.06661
438	-6.122	4.06661
438	-6.922	4.06661
438	-7.722	3.90655
438	-8.522	3.49523
438	-9.322	3.62443
438	-10.122	3.7186
438	-10.922	3.854
438	-11.722	3.8677
438	-12.522	3.62659
438	-13.322	3.3214
438	-14.122	3.34425
438	-14.922	3.30627
438	-15.722	3.18069
438	-16.522	3.17572
438	-17.322	3.17572
438	-18.122	3.17572
438	-18.922	3.38295
438	-19.722	3.77123
438	-20.522	3.79886
438	-21.322	3.58447
438	-22.122	3.45284
438	-22.922	3.47681
438	-23.722	3.79053
438	-24.522	3.90388
438	-25.322	3.90938
438	-26.122	3.91209
438	-26.922	3.91214
438	-27.722	3.91209
438	-28.522	3.91365
438	-29.322	3.91364
438	-30.122	3.91364
438	-30.922	3.91364
438	-31.722	3.91364
438	-32.522	3.91364
438	-33.322	3.91364
438	-34.122	3.91364
438	-34.922	3.91364
438	-35.722	3.91364
438	-36.522	3.91296
438	-37.322	3.90902
438	-38.122	3.90867
438	-38.922	3.94231
438	-39.722	4.039
438	-40.522	4.07099
438	-41.322	4.20243
438	-42.122	4.38138
438	-42.922	4.4407
438	-43.722	4.47855
438	-44.522	4.49696
438	-45.322	4.53861
438	-46.122	4.69695
438	-46.922	4.71165
438	-47.722	4.51143
438	-48.522	4.38067
438	-49.322	4.32091
438	-50.122	4.32458
438	-50.922	4.3999
438	-51.722	4.47186
438	-52.522	4.47784
438	-53.322	4.50101
438	-54.122	4.52473
438	-54.922	4.50677
438	-55.722	4.36401
438	-56.522	4.26153
438	-57.322	4.24692
438	-58.122	4.24536
438	-58.922	4.24204
438	-59.722	4.2381
438	-60.522	4.23623
438	-61.322	4.24143
438	-62.122	4.31324
438	-62.922	4.38296
438	-63.722	4.52808
438	-64.522	4.82345
438	-65.322	4.97893
438	-66.122	4.98541
438	-66.922	4.98541
438	-67.722	4.98541
438	-68.522	4.98541
438	-69.322	4.89694
438	-70.122	4.65462
438	-70.922	4.49434
438	-71.722	4.39509
438	-72.522	4.44634
438	-73.322	4.50673
438	-74.122	4.52918
438	-74.922	4.42264
438	-75.722	4.34754
438	-76.522	4.25369
438	-77.322	4.12032

## Sheet: Figure 3e
Figure 3e
MCMC RF inversion result (Vp)
Distance/km	Depth/km (postive represents above sea level)	Vp (km/s)
21	0.274	5.95681
21	-0.526	5.95621
21	-1.326	5.9581
21	-2.126	5.95998
21	-2.926	6.00016
21	-3.726	6.01945
21	-4.526	6.01711
21	-5.326	6.00945
21	-6.126	5.99625
21	-6.926	5.98949
21	-7.726	6.00196
21	-8.526	6.02477
21	-9.326	6.03481
21	-10.126	6.03632
21	-10.926	6.36512
21	-11.726	6.59745
21	-12.526	6.60137
21	-13.326	6.60129
21	-14.126	6.60128
21	-14.926	6.60128
21	-15.726	6.60128
21	-16.526	6.60133
21	-17.326	6.60133
21	-18.126	6.60133
21	-18.926	6.60133
21	-19.726	6.60133
21	-20.526	6.60133
21	-21.326	6.60133
21	-22.126	6.60133
21	-22.926	6.60133
21	-23.726	6.60133
21	-24.526	6.60938
21	-25.326	6.62573
21	-26.126	6.62573
21	-26.926	6.62586
21	-27.726	6.63236
21	-28.526	6.65947
21	-29.326	6.67402
21	-30.126	6.67788
21	-30.926	6.67779
21	-31.726	6.67898
21	-32.526	6.6843
21	-33.326	6.68459
21	-34.126	6.68459
21	-34.926	6.68459
21	-35.726	6.70244
21	-36.526	6.72053
21	-37.326	6.89607
21	-38.126	7.52279
21	-38.926	7.61232
21	-39.726	7.61808
21	-40.526	7.62193
21	-41.326	7.63163
21	-42.126	7.6939
21	-42.926	7.75568
21	-43.726	7.76394
21	-44.526	7.76214
21	-45.326	7.7476
21	-46.126	7.72591
21	-46.926	7.72088
21	-47.726	7.71902
21	-48.526	7.71687
21	-49.326	7.71498
21	-50.126	7.74507
21	-50.926	7.76788
21	-51.726	7.75692
21	-52.526	7.74814
21	-53.326	7.74384
21	-54.126	7.74325
21	-54.926	7.74463
21	-55.726	7.75046
21	-56.526	7.78911
21	-57.326	7.83181
21	-58.126	7.85412
21	-58.926	7.86048
21	-59.726	7.86394
21	-60.526	7.86671
21	-61.326	7.8666
21	-62.126	7.86762
21	-62.926	7.87304
21	-63.726	7.88123
21	-64.526	7.88767
21	-65.326	7.89116
21	-66.126	7.88864
21	-66.926	7.8432
21	-67.726	7.70244
21	-68.526	7.67255
21	-69.326	7.79066
21	-70.126	7.8303
21	-70.926	7.834
21	-71.726	7.84176
21	-72.526	7.84981
21	-73.326	7.8558
21	-74.126	7.86115
21	-74.926	7.86011
21	-75.726	7.84649
21	-76.526	7.80077
21	-77.326	7.72388
21	-78.126	7.69729
21	-78.926	7.69971
27	0.89	5.99982
27	0.09	6.00566
27	-0.71	6.03406
27	-1.51	6.0357
27	-2.31	6.00354
27	-3.11	5.99076
27	-3.91	6.04975
27	-4.71	6.65772
27	-5.51	6.82158
27	-6.31	6.82158
27	-7.11	6.82158
27	-7.91	6.82158
27	-8.71	6.82158
27	-9.51	6.82158
27	-10.31	6.82158
27	-11.11	6.82158
27	-11.91	6.82158
27	-12.71	6.82158
27	-13.51	6.82158
27	-14.31	6.82158
27	-15.11	6.82158
27	-15.91	6.82158
27	-16.71	6.82158
27	-17.51	6.82158
27	-18.31	6.82158
27	-19.11	6.82158
27	-19.91	6.82158
27	-20.71	6.82158
27	-21.51	6.82158
27	-22.31	6.82158
27	-23.11	6.82158
27	-23.91	6.82158
27	-24.71	6.82158
27	-25.51	6.82158
27	-26.31	6.82158
27	-27.11	6.82158
27	-27.91	6.82158
27	-28.71	6.82158
27	-29.51	6.82158
27	-30.31	6.82158
27	-31.11	6.82158
27	-31.91	6.82158
27	-32.71	6.82158
27	-33.51	6.82158
27	-34.31	6.82158
27	-35.11	6.82158
27	-35.91	6.82158
27	-36.71	6.82158
27	-37.51	6.82221
27	-38.31	6.93981
27	-39.11	7.52014
27	-39.91	7.65755
27	-40.71	7.65859
27	-41.51	7.66973
27	-42.31	7.72089
27	-43.11	7.77532
27	-43.91	7.80597
27	-44.71	7.81804
27	-45.51	7.82153
27	-46.31	7.82211
27	-47.11	7.8129
27	-47.91	7.74744
27	-48.71	7.6708
27	-49.51	7.66154
27	-50.31	7.65709
27	-51.11	7.65316
27	-51.91	7.65481
27	-52.71	7.68174
27	-53.51	7.78991
27	-54.31	7.87899
27	-55.11	7.89335
27	-55.91	7.89423
27	-56.71	7.89613
27	-57.51	7.897
27	-58.31	7.89752
27	-59.11	7.89923
27	-59.91	7.8994
27	-60.71	7.89868
27	-61.51	7.89833
27	-62.31	7.89703
27	-63.11	7.89084
27	-63.91	7.88158
27	-64.71	7.87731
27	-65.51	7.87766
27	-66.31	7.87217
27	-67.11	7.8116
27	-67.91	7.67014
27	-68.71	7.65595
27	-69.51	7.7145
27	-70.31	7.75742
27	-71.11	7.77454
27	-71.91	7.78728
27	-72.71	7.78432
27	-73.51	7.77475
27	-74.31	7.77118
27	-75.11	7.77601
27	-75.91	7.7922
27	-76.71	7.80693
27	-77.51	7.83108
27	-78.31	7.86552
69	0.779	5.98652
69	-0.021	5.98684
69	-0.821	6.01948
69	-1.621	6.00103
69	-2.421	6.03838
69	-3.221	6.1139
69	-4.021	6.11389
69	-4.821	6.11389
69	-5.621	6.11389
69	-6.421	6.11339
69	-7.221	6.10002
69	-8.021	5.92732
69	-8.821	5.97642
69	-9.621	6.05394
69	-10.421	6.05542
69	-11.221	6.03446
69	-12.021	6.01581
69	-12.821	6.02176
69	-13.621	6.02513
69	-14.421	6.03429
69	-15.221	6.04609
69	-16.021	6.04565
69	-16.821	6.04553
69	-17.621	6.04553
69	-18.421	6.04553
69	-19.221	6.04553
69	-20.021	6.04553
69	-20.821	6.04553
69	-21.621	6.29825
69	-22.421	6.64111
69	-23.221	6.64742
69	-24.021	6.64927
69	-24.821	6.67125
69	-25.621	6.66995
69	-26.421	6.64736
69	-27.221	6.62713
69	-28.021	6.62276
69	-28.821	6.63781
69	-29.621	6.77025
69	-30.421	6.94563
69	-31.221	7.0267
69	-32.021	7.02731
69	-32.821	7.04465
69	-33.621	7.50016
69	-34.421	7.72151
69	-35.221	7.72303
69	-36.021	7.7266
69	-36.821	7.72897
69	-37.621	7.7259
69	-38.421	7.72511
69	-39.221	7.7174
69	-40.021	7.70485
69	-40.821	7.69068
69	-41.621	7.68713
69	-42.421	7.6947
69	-43.221	7.71436
69	-44.021	7.72666
69	-44.821	7.73304
69	-45.621	7.74373
69	-46.421	7.75928
69	-47.221	7.77839
69	-48.021	7.79171
69	-48.821	7.78827
69	-49.621	7.7848
69	-50.421	7.78334
69	-51.221	7.78161
69	-52.021	7.78313
69	-52.821	7.79049
69	-53.621	7.7957
69	-54.421	7.79748
69	-55.221	7.79152
69	-56.021	7.78348
69	-56.821	7.77857
69	-57.621	7.77509
69	-58.421	7.76784
69	-59.221	7.75766
69	-60.021	7.74299
69	-60.821	7.73856
69	-61.621	7.74425
69	-62.421	7.75796
69	-63.221	7.77453
69	-64.021	7.78027
69	-64.821	7.74253
69	-65.621	7.69014
69	-66.421	7.69877
69	-67.221	7.72139
69	-68.021	7.80752
69	-68.821	7.90303
69	-69.621	7.94433
69	-70.421	7.95142
69	-71.221	7.94772
69	-72.021	7.93313
69	-72.821	7.90177
69	-73.621	7.8292
69	-74.421	7.73041
69	-75.221	7.68581
69	-76.021	7.70824
69	-76.821	7.74207
69	-77.621	7.77344
69	-78.421	7.79642
131	0.391	5.9575
131	-0.409	5.95732
131	-1.209	5.96883
131	-2.009	6.07156
131	-2.809	6.08084
131	-3.609	5.93915
131	-4.409	5.80217
131	-5.209	5.77455
131	-6.009	5.76156
131	-6.809	5.65942
131	-7.609	5.58557
131	-8.409	5.58714
131	-9.209	6.51209
131	-10.009	6.53279
131	-10.809	6.53279
131	-11.609	6.53279
131	-12.409	6.53279
131	-13.209	6.53279
131	-14.009	6.53279
131	-14.809	6.53279
131	-15.609	6.49444
131	-16.409	6.44972
131	-17.209	6.44925
131	-18.009	6.44659
131	-18.809	6.45047
131	-19.609	6.58425
131	-20.409	6.58048
131	-21.209	6.57043
131	-22.009	6.56938
131	-22.809	6.6851
131	-23.609	6.69659
131	-24.409	6.70222
131	-25.209	6.70357
131	-26.009	6.70355
131	-26.809	6.70378
131	-27.609	6.78779
131	-28.409	6.89
131	-29.209	7.07444
131	-30.009	7.21456
131	-30.809	7.65288
131	-31.609	7.87011
131	-32.409	7.87011
131	-33.209	7.87011
131	-34.009	7.87295
131	-34.809	7.95442
131	-35.609	7.9678
131	-36.409	7.9677
131	-37.209	7.96379
131	-38.009	7.82309
131	-38.809	7.83238
131	-39.609	7.86946
131	-40.409	7.91679
131	-41.209	7.93438
131	-42.009	7.91943
131	-42.809	7.91069
131	-43.609	7.91381
131	-44.409	7.9084
131	-45.209	7.88438
131	-46.009	7.79629
131	-46.809	7.66434
131	-47.609	7.60718
131	-48.409	7.59757
131	-49.209	7.58705
131	-50.009	7.56549
131	-50.809	7.54754
131	-51.609	7.54261
131	-52.409	7.54528
131	-53.209	7.5734
131	-54.009	7.61662
131	-54.809	7.67898
131	-55.609	7.79905
131	-56.409	7.85036
131	-57.209	7.87839
131	-58.009	7.95125
131	-58.809	7.97506
131	-59.609	7.93753
131	-60.409	7.91776
131	-61.209	7.86851
131	-62.009	7.81099
131	-62.809	7.786
131	-63.609	7.66942
131	-64.409	7.64225
131	-65.209	7.63853
131	-66.009	7.63788
131	-66.809	7.66169
131	-67.609	7.62667
131	-68.409	7.63319
131	-69.209	7.63251
131	-70.009	7.67445
131	-70.809	7.66318
131	-71.609	7.70295
131	-72.409	7.78789
131	-73.209	7.79213
131	-74.009	7.91694
131	-74.809	8.01716
131	-75.609	8.10038
131	-76.409	8.05087
131	-77.209	7.97075
131	-78.009	7.84599
131	-78.809	7.73432
155	0.416	6.04268
155	-0.384	6.0432
155	-1.184	6.04781
155	-1.984	6.10604
155	-2.784	6.0833
155	-3.584	6.08211
155	-4.384	6.05757
155	-5.184	6.05532
155	-5.984	6.03876
155	-6.784	6.0048
155	-7.584	5.96839
155	-8.384	5.97195
155	-9.184	6.01703
155	-9.984	6.28329
155	-10.784	6.62696
155	-11.584	6.62801
155	-12.384	6.62757
155	-13.184	6.6569
155	-13.984	6.66221
155	-14.784	6.66221
155	-15.584	6.66221
155	-16.384	6.66221
155	-17.184	6.65111
155	-17.984	6.63678
155	-18.784	6.63678
155	-19.584	6.63678
155	-20.384	6.6412
155	-21.184	6.75041
155	-21.984	6.75042
155	-22.784	6.75049
155	-23.584	6.75049
155	-24.384	6.75137
155	-25.184	6.75169
155	-25.984	6.75169
155	-26.784	6.75177
155	-27.584	6.75177
155	-28.384	6.75242
155	-29.184	6.74148
155	-29.984	6.73482
155	-30.784	6.74094
155	-31.584	6.75353
155	-32.384	6.91351
155	-33.184	7.21685
155	-33.984	7.71908
155	-34.784	7.7328
155	-35.584	7.73708
155	-36.384	7.72992
155	-37.184	7.72295
155	-37.984	7.71618
155	-38.784	7.7167
155	-39.584	7.72885
155	-40.384	7.75147
155	-41.184	7.76283
155	-41.984	7.76697
155	-42.784	7.77703
155	-43.584	7.80691
155	-44.384	7.83957
155	-45.184	7.85981
155	-45.984	7.89312
155	-46.784	7.91132
155	-47.584	7.92378
155	-48.384	7.92531
155	-49.184	7.90666
155	-49.984	7.82467
155	-50.784	7.66816
155	-51.584	7.6366
155	-52.384	7.63731
155	-53.184	7.65001
155	-53.984	7.6852
155	-54.784	7.71274
155	-55.584	7.73511
155	-56.384	7.75738
155	-57.184	7.78196
155	-57.984	7.77877
155	-58.784	7.77324
155	-59.584	7.76858
155	-60.384	7.764
155	-61.184	7.75789
155	-61.984	7.75233
155	-62.784	7.75111
155	-63.584	7.75164
155	-64.384	7.7525
155	-65.184	7.75563
155	-65.984	7.72397
155	-66.784	7.65182
155	-67.584	7.68111
155	-68.384	7.77824
155	-69.184	7.7831
155	-69.984	7.7851
155	-70.784	7.78558
155	-71.584	7.77397
155	-72.384	7.76601
155	-73.184	7.772
155	-73.984	7.78417
155	-74.784	7.7678
155	-75.584	7.70203
155	-76.384	7.66914
155	-77.184	7.66927
155	-77.984	7.67738
155	-78.784	7.77724
195	1.322	5.95699
195	0.522	6.07299
195	-0.278	6.13988
195	-1.078	6.13457
195	-1.878	6.02868
195	-2.678	5.96674
195	-3.478	6.02355
195	-4.278	6.10699
195	-5.078	6.10622
195	-5.878	6.09184
195	-6.678	6.04043
195	-7.478	6.03248
195	-8.278	5.95976
195	-9.078	5.96114
195	-9.878	5.96109
195	-10.678	6.00986
195	-11.478	6.04965
195	-12.278	6.04828
195	-13.078	6.04017
195	-13.878	6.05712
195	-14.678	6.53343
195	-15.478	6.63023
195	-16.278	6.63023
195	-17.078	6.63023
195	-17.878	6.63023
195	-18.678	6.63023
195	-19.478	6.63023
195	-20.278	6.63023
195	-21.078	6.6302
195	-21.878	6.63109
195	-22.678	6.63209
195	-23.478	6.63278
195	-24.278	6.64303
195	-25.078	6.65576
195	-25.878	6.66851
195	-26.678	6.72181
195	-27.478	6.7663
195	-28.278	6.78744
195	-29.078	6.78392
195	-29.878	6.78258
195	-30.678	6.77941
195	-31.478	6.77592
195	-32.278	6.79023
195	-33.078	7.00357
195	-33.878	7.418
195	-34.678	7.46162
195	-35.478	7.46172
195	-36.278	7.46173
195	-37.078	7.46201
195	-37.878	7.46589
195	-38.678	7.52044
195	-39.478	7.55091
195	-40.278	7.5806
195	-41.078	7.61298
195	-41.878	7.62454
195	-42.678	7.62001
195	-43.478	7.60454
195	-44.278	7.58151
195	-45.078	7.56043
195	-45.878	7.55628
195	-46.678	7.56496
195	-47.478	7.62141
195	-48.278	7.6892
195	-49.078	7.68687
195	-49.878	7.68603
195	-50.678	7.69011
195	-51.478	7.70637
195	-52.278	7.73212
195	-53.078	7.74547
195	-53.878	7.75977
195	-54.678	7.77153
195	-55.478	7.79116
195	-56.278	7.81309
195	-57.078	7.83386
195	-57.878	7.84858
195	-58.678	7.85655
195	-59.478	7.8624
195	-60.278	7.8549
195	-61.078	7.81198
195	-61.878	7.76257
195	-62.678	7.74821
195	-63.478	7.76059
195	-64.278	7.81187
195	-65.078	7.74563
195	-65.878	7.68498
195	-66.678	7.7529
195	-67.478	7.81335
195	-68.278	7.86284
195	-69.078	7.87489
195	-69.878	7.87094
195	-70.678	7.84377
195	-71.478	7.79679
195	-72.278	7.78577
195	-73.078	7.79454
195	-73.878	7.82071
195	-74.678	7.86796
195	-75.478	7.89369
195	-76.278	7.88795
195	-77.078	7.80023
195	-77.878	7.65076
202	0.988	6.04342
202	0.188	6.03771
202	-0.612	6.04007
202	-1.412	6.06832
202	-2.212	6.11795
202	-3.012	6.1167
202	-3.812	6.07562
202	-4.612	5.96613
202	-5.412	5.95155
202	-6.212	5.94042
202	-7.012	5.92761
202	-7.812	5.92189
202	-8.612	5.91441
202	-9.412	5.91765
202	-10.212	5.94354
202	-11.012	5.99412
202	-11.812	6.22005
202	-12.612	6.36494
202	-13.412	6.36526
202	-14.212	6.36408
202	-15.012	6.35621
202	-15.812	6.31807
202	-16.612	6.31744
202	-17.412	6.49435
202	-18.212	6.57632
202	-19.012	6.57632
202	-19.812	6.5784
202	-20.612	6.64306
202	-21.412	6.67654
202	-22.212	6.73108
202	-23.012	6.72946
202	-23.812	6.72407
202	-24.612	6.71021
202	-25.412	6.70052
202	-26.212	6.69039
202	-27.012	6.68364
202	-27.812	6.6826
202	-28.612	6.70365
202	-29.412	6.68635
202	-30.212	6.68216
202	-31.012	6.67801
202	-31.812	6.67737
202	-32.612	6.68091
202	-33.412	6.72816
202	-34.212	6.81818
202	-35.012	7.03556
202	-35.812	7.34802
202	-36.612	7.49195
202	-37.412	7.59422
202	-38.212	7.72526
202	-39.012	7.73011
202	-39.812	7.71922
202	-40.612	7.70803
202	-41.412	7.70071
202	-42.212	7.69915
202	-43.012	7.70706
202	-43.812	7.73852
202	-44.612	7.75155
202	-45.412	7.75403
202	-46.212	7.75818
202	-47.012	7.74495
202	-47.812	7.75258
202	-48.612	7.77419
202	-49.412	7.7379
202	-50.212	7.74847
202	-51.012	7.80068
202	-51.812	7.82294
202	-52.612	7.83553
202	-53.412	7.83733
202	-54.212	7.83621
202	-55.012	7.83606
202	-55.812	7.83572
202	-56.612	7.8342
202	-57.412	7.83315
202	-58.212	7.83309
202	-59.012	7.83356
202	-59.812	7.83512
202	-60.612	7.84492
202	-61.412	7.86669
202	-62.212	7.88821
202	-63.012	7.88863
202	-63.812	7.86886
202	-64.612	7.78921
202	-65.412	7.73638
202	-66.212	7.6792
202	-67.012	7.66391
202	-67.812	7.89569
202	-68.612	7.96324
202	-69.412	7.96451
202	-70.212	7.96425
202	-71.012	7.95579
202	-71.812	7.94249
202	-72.612	7.88941
202	-73.412	7.79165
202	-74.212	7.78285
202	-75.012	7.75135
202	-75.812	7.72369
202	-76.612	7.72341
202	-77.412	7.71897
202	-78.212	7.71284
210	1.431	5.91953
210	0.631	6.25509
210	-0.169	6.45045
210	-0.969	6.45045
210	-1.769	6.45045
210	-2.569	6.45045
210	-3.369	6.45045
210	-4.169	6.45045
210	-4.969	6.42439
210	-5.769	6.35603
210	-6.569	6.45149
210	-7.369	6.49555
210	-8.169	6.49638
210	-8.969	6.43402
210	-9.769	6.09767
210	-10.569	5.99451
210	-11.369	5.98212
210	-12.169	5.9798
210	-12.969	5.99419
210	-13.769	6.04253
210	-14.569	6.0431
210	-15.369	6.03879
210	-16.169	6.06282
210	-16.969	6.0882
210	-17.769	6.10696
210	-18.569	5.98718
210	-19.369	5.97091
210	-20.169	5.97276
210	-20.969	5.97428
210	-21.769	5.98608
210	-22.569	5.99055
210	-23.369	6.06299
210	-24.169	6.09612
210	-24.969	6.22163
210	-25.769	6.51504
210	-26.569	6.91972
210	-27.369	6.92023
210	-28.169	6.92023
210	-28.969	6.92023
210	-29.769	6.92023
210	-30.569	6.92023
210	-31.369	6.92023
210	-32.169	6.93257
210	-32.969	6.93354
210	-33.769	6.93354
210	-34.569	6.93437
210	-35.369	6.94151
210	-36.169	6.99701
210	-36.969	7.05816
210	-37.769	7.10319
210	-38.569	7.1055
210	-39.369	7.10584
210	-40.169	7.10685
210	-40.969	7.1072
210	-41.769	7.10728
210	-42.569	7.10749
210	-43.369	7.10182
210	-44.169	7.12409
210	-44.969	7.12412
210	-45.769	7.12412
210	-46.569	7.12413
210	-47.369	7.12413
210	-48.169	7.19055
210	-48.969	7.23943
210	-49.769	7.26752
210	-50.569	7.32476
210	-51.369	7.44703
210	-52.169	7.39435
210	-52.969	7.32978
210	-53.769	7.27374
210	-54.569	7.27298
210	-55.369	7.27293
210	-56.169	7.27614
210	-56.969	7.37053
210	-57.769	7.76775
210	-58.569	7.92469
210	-59.369	7.95761
210	-60.169	7.95715
210	-60.969	7.95465
210	-61.769	7.86846
210	-62.569	8.0163
210	-63.369	8.06975
210	-64.169	8.06198
210	-64.969	7.99472
210	-65.769	7.95073
210	-66.569	7.95072
210	-67.369	7.93441
210	-68.169	7.93675
210	-68.969	7.9451
210	-69.769	7.94356
210	-70.569	7.91603
210	-71.369	7.88977
210	-72.169	7.90041
210	-72.969	7.91152
210	-73.769	7.92311
210	-74.569	7.93487
210	-75.369	7.9402
210	-76.169	7.94574
210	-76.969	7.93554
210	-77.769	7.90491
242	1.338	5.81996
242	0.538	5.82758
242	-0.262	5.82758
242	-1.062	6.16995
242	-1.862	6.24822
242	-2.662	6.25519
242	-3.462	6.2279
242	-4.262	6.08862
242	-5.062	6.07913
242	-5.862	6.09244
242	-6.662	6.21955
242	-7.462	6.21294
242	-8.262	6.20988
242	-9.062	6.23805
242	-9.862	6.25843
242	-10.662	6.26036
242	-11.462	6.25102
242	-12.262	6.23991
242	-13.062	6.2241
242	-13.862	6.19755
242	-14.662	6.16566
242	-15.462	6.15269
242	-16.262	6.16546
242	-17.062	6.19246
242	-17.862	6.20841
242	-18.662	6.03915
242	-19.462	5.90647
242	-20.262	5.90197
242	-21.062	5.89459
242	-21.862	5.89521
242	-22.662	5.90876
242	-23.462	5.92081
242	-24.262	5.9196
242	-25.062	5.92845
242	-25.862	5.93604
242	-26.662	5.93829
242	-27.462	6.84497
242	-28.262	7.10386
242	-29.062	7.16692
242	-29.862	7.21622
242	-30.662	7.21771
242	-31.462	7.20949
242	-32.262	7.19086
242	-33.062	7.17147
242	-33.862	7.14017
242	-34.662	7.0389
242	-35.462	7.00374
242	-36.262	7.00286
242	-37.062	7.03218
242	-37.862	7.17339
242	-38.662	7.18861
242	-39.462	7.17598
242	-40.262	7.23568
242	-41.062	7.26251
242	-41.862	7.26183
242	-42.662	7.27547
242	-43.462	7.30143
242	-44.262	7.28329
242	-45.062	7.29302
242	-45.862	7.73871
242	-46.662	7.75703
242	-47.462	7.77616
242	-48.262	7.80444
242	-49.062	7.80742
242	-49.862	7.81694
242	-50.662	7.92142
242	-51.462	8.02034
242	-52.262	8.03582
242	-53.062	8.03236
242	-53.862	7.959
242	-54.662	7.71668
242	-55.462	7.71231
242	-56.262	7.71183
242	-57.062	7.71179
242	-57.862	7.71183
242	-58.662	7.79197
242	-59.462	7.98058
242	-60.262	7.98818
242	-61.062	7.96166
242	-61.862	7.85232
242	-62.662	7.79387
242	-63.462	7.79354
242	-64.262	7.79348
242	-65.062	7.79352
242	-65.862	7.80651
242	-66.662	7.95711
242	-67.462	8.00789
242	-68.262	8.00319
242	-69.062	7.95715
242	-69.862	7.92214
242	-70.662	7.93335
242	-71.462	7.98124
242	-72.262	7.996
242	-73.062	8.00654
242	-73.862	8.01773
242	-74.662	8.02252
242	-75.462	8.01032
242	-76.262	7.96173
242	-77.062	7.95033
242	-77.862	7.84123
290	1.246	5.77723
290	0.446	5.77724
290	-0.354	5.85599
290	-1.154	5.87786
290	-1.954	6.05136
290	-2.754	6.17156
290	-3.554	6.18262
290	-4.354	6.17612
290	-5.154	6.13346
290	-5.954	6.07245
290	-6.754	6.05914
290	-7.554	6.04793
290	-8.354	6.05378
290	-9.154	6.21984
290	-9.954	6.25222
290	-10.754	6.26469
290	-11.554	6.26623
290	-12.354	6.2663
290	-13.154	6.26552
290	-13.954	6.2344
290	-14.754	6.17834
290	-15.554	6.04454
290	-16.354	5.99532
290	-17.154	5.95978
290	-17.954	5.9582
290	-18.754	5.95872
290	-19.554	6.13076
290	-20.354	6.17945
290	-21.154	6.17945
290	-21.954	6.17945
290	-22.754	6.17945
290	-23.554	6.17945
290	-24.354	6.17945
290	-25.154	6.17945
290	-25.954	6.17945
290	-26.754	6.17945
290	-27.554	6.17945
290	-28.354	6.17945
290	-29.154	6.17945
290	-29.954	6.17945
290	-30.754	6.17945
290	-31.554	6.17945
290	-32.354	6.17945
290	-33.154	6.17945
290	-33.954	6.22914
290	-34.754	7.12657
290	-35.554	7.1525
290	-36.354	7.1525
290	-37.154	7.1525
290	-37.954	7.1525
290	-38.754	7.1525
290	-39.554	7.1525
290	-40.354	7.1525
290	-41.154	7.1525
290	-41.954	7.1525
290	-42.754	7.1525
290	-43.554	7.2926
290	-44.354	7.34098
290	-45.154	7.33172
290	-45.954	7.32783
290	-46.754	7.32782
290	-47.554	7.35425
290	-48.354	7.75079
290	-49.154	7.83595
290	-49.954	7.8529
290	-50.754	7.85656
290	-51.554	7.85468
290	-52.354	7.85675
290	-53.154	7.87115
290	-53.954	7.91891
290	-54.754	8.0084
290	-55.554	8.08046
290	-56.354	8.08597
290	-57.154	7.99715
290	-57.954	7.77813
290	-58.754	7.821
290	-59.554	7.88089
290	-60.354	7.89917
290	-61.154	7.9203
290	-61.954	7.92969
290	-62.754	7.91088
290	-63.554	7.86577
290	-64.354	7.87871
290	-65.154	7.88646
290	-65.954	7.90097
290	-66.754	7.90728
290	-67.554	7.88552
290	-68.354	7.85637
290	-69.154	7.83954
290	-69.954	7.79037
290	-70.754	7.77009
290	-71.554	7.771
290	-72.354	7.77194
290	-73.154	7.77809
290	-73.954	7.78842
290	-74.754	7.8593
290	-75.554	7.92594
290	-76.354	7.91652
290	-77.154	7.8979
290	-77.954	7.90495
318	1.754	5.79023
318	0.954	6.01902
318	0.154	6.08597
318	-0.646	6.09406
318	-1.446	6.09406
318	-2.246	6.09406
318	-3.046	6.10747
318	-3.846	6.1918
318	-4.646	6.24622
318	-5.446	6.18515
318	-6.246	6.15689
318	-7.046	6.16472
318	-7.846	6.19964
318	-8.646	6.19583
318	-9.446	6.16896
318	-10.246	6.15973
318	-11.046	6.16896
318	-11.846	6.16367
318	-12.646	6.17049
318	-13.446	6.20745
318	-14.246	6.19928
318	-15.046	6.16045
318	-15.846	6.13573
318	-16.646	6.17841
318	-17.446	6.20461
318	-18.246	6.18408
318	-19.046	5.9679
318	-19.846	5.95564
318	-20.646	5.9342
318	-21.446	5.889
318	-22.246	5.90219
318	-23.046	5.89004
318	-23.846	5.85189
318	-24.646	5.9322
318	-25.446	5.94466
318	-26.246	5.95097
318	-27.046	5.96391
318	-27.846	5.95478
318	-28.646	5.90591
318	-29.446	5.89256
318	-30.246	6.04467
318	-31.046	6.53969
318	-31.846	6.86571
318	-32.646	6.99756
318	-33.446	6.99893
318	-34.246	7.00628
318	-35.046	7.07911
318	-35.846	7.1523
318	-36.646	7.16483
318	-37.446	7.22124
318	-38.246	7.38815
318	-39.046	7.44665
318	-39.846	7.51047
318	-40.646	7.6155
318	-41.446	7.72908
318	-42.246	7.72571
318	-43.046	7.83965
318	-43.846	7.90417
318	-44.646	7.9841
318	-45.446	7.99653
318	-46.246	7.99653
318	-47.046	7.99775
318	-47.846	7.99757
318	-48.646	7.99423
318	-49.446	7.99349
318	-50.246	7.97937
318	-51.046	7.93484
318	-51.846	7.91766
318	-52.646	7.89908
318	-53.446	7.87991
318	-54.246	7.87842
318	-55.046	7.87563
318	-55.846	7.87311
318	-56.646	7.86797
318	-57.446	7.86134
318	-58.246	7.83271
318	-59.046	7.81575
318	-59.846	7.85057
318	-60.646	7.86848
318	-61.446	7.88154
318	-62.246	7.89628
318	-63.046	7.91325
318	-63.846	7.92547
318	-64.646	7.93234
318	-65.446	7.93778
318	-66.246	7.9441
318	-67.046	7.94131
318	-67.846	7.92933
318	-68.646	7.92809
318	-69.446	7.91108
318	-70.246	7.85623
318	-71.046	7.82842
318	-71.846	7.84009
318	-72.646	7.93942
318	-73.446	7.98755
318	-74.246	8.01024
318	-75.046	8.05188
318	-75.846	8.06293
318	-76.646	8.04668
318	-77.446	7.90579
343	1.42	5.81201
343	0.62	5.95407
343	-0.18	5.80293
343	-0.98	5.80304
343	-1.78	5.80304
343	-2.58	5.95584
343	-3.38	6.07363
343	-4.18	6.10329
343	-4.98	6.10417
343	-5.78	6.10182
343	-6.58	6.03583
343	-7.38	5.98914
343	-8.18	5.8829
343	-8.98	5.91185
343	-9.78	6.24453
343	-10.58	6.27572
343	-11.38	6.22011
343	-12.18	6.25444
343	-12.98	6.28319
343	-13.78	6.27509
343	-14.58	6.23602
343	-15.38	6.22063
343	-16.18	6.23671
343	-16.98	6.25991
343	-17.78	6.16607
343	-18.58	5.91032
343	-19.38	5.90255
343	-20.18	6.06687
343	-20.98	6.08205
343	-21.78	5.83272
343	-22.58	5.82473
343	-23.38	5.85
343	-24.18	5.81461
343	-24.98	5.8033
343	-25.78	5.80329
343	-26.58	5.80508
343	-27.38	5.81259
343	-28.18	5.77271
343	-28.98	5.75509
343	-29.78	5.75509
343	-30.58	5.75509
343	-31.38	5.765
343	-32.18	6.39194
343	-32.98	6.92466
343	-33.78	6.92904
343	-34.58	6.95687
343	-35.38	6.9706
343	-36.18	6.97051
343	-36.98	6.94311
343	-37.78	6.9371
343	-38.58	7.02195
343	-39.38	7.40917
343	-40.18	7.50019
343	-40.98	7.4482
343	-41.78	7.38431
343	-42.58	7.31093
343	-43.38	7.30838
343	-44.18	7.29982
343	-44.98	7.48254
343	-45.78	7.60088
343	-46.58	7.73932
343	-47.38	7.74055
343	-48.18	7.74038
343	-48.98	7.77154
343	-49.78	7.81863
343	-50.58	7.86775
343	-51.38	7.90429
343	-52.18	7.91545
343	-52.98	7.90963
343	-53.78	7.91575
343	-54.58	7.92335
343	-55.38	7.89794
343	-56.18	7.85909
343	-56.98	7.92212
343	-57.78	7.90146
343	-58.58	7.84749
343	-59.38	7.85788
343	-60.18	7.87831
343	-60.98	7.83406
343	-61.78	7.80117
343	-62.58	7.85135
343	-63.38	7.88385
343	-64.18	7.90458
343	-64.98	7.90593
343	-65.78	7.91872
343	-66.58	7.94185
343	-67.38	7.95188
343	-68.18	7.94146
343	-68.98	7.89934
343	-69.78	7.90685
343	-70.58	7.97994
343	-71.38	7.94695
343	-72.18	7.89124
343	-72.98	7.89737
343	-73.78	7.9655
343	-74.58	8.01553
343	-75.38	8.01302
343	-76.18	7.99937
343	-76.98	7.95272
343	-77.78	7.82728
346	1.314	5.75463
346	0.514	5.94454
346	-0.286	5.94159
346	-1.086	5.92381
346	-1.886	5.91861
346	-2.686	5.95492
346	-3.486	6.17116
346	-4.286	6.11282
346	-5.086	6.04424
346	-5.886	6.04105
346	-6.686	6.04845
346	-7.486	6.32412
346	-8.286	6.362
346	-9.086	6.36086
346	-9.886	6.35026
346	-10.686	6.26347
346	-11.486	6.22612
346	-12.286	6.24417
346	-13.086	6.25358
346	-13.886	6.25811
346	-14.686	6.27984
346	-15.486	6.28252
346	-16.286	6.20016
346	-17.086	6.11886
346	-17.886	6.11563
346	-18.686	6.11333
346	-19.486	6.12078
346	-20.286	6.22985
346	-21.086	6.20925
346	-21.886	6.09778
346	-22.686	6.105
346	-23.486	6.10405
346	-24.286	6.04138
346	-25.086	6.00384
346	-25.886	6.00249
346	-26.686	5.9999
346	-27.486	5.98026
346	-28.286	5.9993
346	-29.086	6.0568
346	-29.886	6.20847
346	-30.686	6.65259
346	-31.486	7.04062
346	-32.286	7.04852
346	-33.086	7.05858
346	-33.886	7.07221
346	-34.686	7.07602
346	-35.486	7.07548
346	-36.286	7.07926
346	-37.086	7.10915
346	-37.886	7.1387
346	-38.686	7.15432
346	-39.486	7.23642
346	-40.286	7.32603
346	-41.086	7.35812
346	-41.886	7.38692
346	-42.686	7.39318
346	-43.486	7.43486
346	-44.286	7.43661
346	-45.086	7.43715
346	-45.886	7.47475
346	-46.686	7.80351
346	-47.486	7.87902
346	-48.286	7.91985
346	-49.086	7.91516
346	-49.886	7.87915
346	-50.686	7.82153
346	-51.486	7.83019
346	-52.286	7.84564
346	-53.086	7.84336
346	-53.886	7.81216
346	-54.686	7.80136
346	-55.486	7.81318
346	-56.286	7.85025
346	-57.086	7.88927
346	-57.886	7.90475
346	-58.686	7.86469
346	-59.486	7.81853
346	-60.286	7.80612
346	-61.086	7.80876
346	-61.886	7.81361
346	-62.686	7.8137
346	-63.486	7.79855
346	-64.286	7.8007
346	-65.086	7.83144
346	-65.886	7.85847
346	-66.686	7.88451
346	-67.486	7.89816
346	-68.286	7.90358
346	-69.086	7.93725
346	-69.886	7.95337
346	-70.686	7.9195
346	-71.486	7.90271
346	-72.286	7.93789
346	-73.086	7.97118
346	-73.886	7.96078
346	-74.686	7.95084
346	-75.486	7.94623
346	-76.286	7.91
346	-77.086	7.88616
346	-77.886	7.85782
384	1.595	5.78629
384	0.795	5.78794
384	-0.005	5.80064
384	-0.805	5.80938
384	-1.605	5.85686
384	-2.405	6.16598
384	-3.205	6.15199
384	-4.005	6.09224
384	-4.805	6.07397
384	-5.605	6.07535
384	-6.405	6.06762
384	-7.205	6.0607
384	-8.005	6.05457
384	-8.805	6.05286
384	-9.605	6.05432
384	-10.405	6.0569
384	-11.205	6.0709
384	-12.005	6.07846
384	-12.805	6.07728
384	-13.605	6.08076
384	-14.405	6.08349
384	-15.205	6.08646
384	-16.005	6.1021
384	-16.805	6.16285
384	-17.605	6.1655
384	-18.405	6.16452
384	-19.205	6.55931
384	-20.005	7.17658
384	-20.805	7.18434
384	-21.605	7.18434
384	-22.405	7.18434
384	-23.205	7.18434
384	-24.005	7.18434
384	-24.805	7.18434
384	-25.605	7.18434
384	-26.405	7.18434
384	-27.205	7.18434
384	-28.005	7.18434
384	-28.805	7.34775
384	-29.605	7.35486
384	-30.405	7.35486
384	-31.205	7.35486
384	-32.005	7.35524
384	-32.805	7.35557
384	-33.605	7.35564
384	-34.405	7.35571
384	-35.205	7.35649
384	-36.005	7.35679
384	-36.805	7.35676
384	-37.605	7.36419
384	-38.405	7.37484
384	-39.205	7.40398
384	-40.005	7.52823
384	-40.805	7.55742
384	-41.605	7.57848
384	-42.405	7.59028
384	-43.205	7.66275
384	-44.005	7.77935
384	-44.805	7.84491
384	-45.605	7.85373
384	-46.405	7.85373
384	-47.205	7.85373
384	-48.005	7.85329
384	-48.805	7.85516
384	-49.605	7.8578
384	-50.405	7.86341
384	-51.205	7.87016
384	-52.005	7.88131
384	-52.805	7.89322
384	-53.605	7.90035
384	-54.405	7.90854
384	-55.205	7.92777
384	-56.005	7.93912
384	-56.805	7.9367
384	-57.605	7.93617
384	-58.405	7.94002
384	-59.205	7.96552
384	-60.005	8.00104
384	-60.805	8.03515
384	-61.605	8.05902
384	-62.405	8.03413
384	-63.205	7.96669
384	-64.005	7.84585
384	-64.805	7.71321
384	-65.605	7.67903
384	-66.405	7.67894
384	-67.205	7.67895
384	-68.005	7.67895
384	-68.805	7.69985
384	-69.605	7.72894
384	-70.405	7.8216
384	-71.205	7.82273
384	-72.005	7.81076
384	-72.805	7.7992
384	-73.605	7.79203
384	-74.405	7.78795
384	-75.205	7.7935
384	-76.005	7.80214
384	-76.805	7.81069
384	-77.605	7.79404
402	0.996	5.92567
402	0.196	5.93721
402	-0.604	5.9404
402	-1.404	5.94073
402	-2.204	5.89948
402	-3.004	5.94036
402	-3.804	5.97688
402	-4.604	5.97572
402	-5.404	5.97674
402	-6.204	5.97398
402	-7.004	5.98041
402	-7.804	5.95922
402	-8.604	5.9644
402	-9.404	6.05695
402	-10.204	6.19489
402	-11.004	6.20836
402	-11.804	6.20934
402	-12.604	6.20793
402	-13.404	6.1913
402	-14.204	6.19603
402	-15.004	6.18019
402	-15.804	6.12664
402	-16.604	6.02861
402	-17.404	5.94828
402	-18.204	5.95106
402	-19.004	5.98348
402	-19.804	6.02378
402	-20.604	6.23854
402	-21.404	6.29123
402	-22.204	6.37359
402	-23.004	6.26164
402	-23.804	6.25727
402	-24.604	6.26449
402	-25.404	6.27269
402	-26.204	6.27667
402	-27.004	6.282
402	-27.804	6.30685
402	-28.604	6.30787
402	-29.404	6.30857
402	-30.204	6.30857
402	-31.004	6.30857
402	-31.804	6.31582
402	-32.604	6.31582
402	-33.404	6.63441
402	-34.204	6.83063
402	-35.004	7.20105
402	-35.804	7.21004
402	-36.604	7.21278
402	-37.404	7.21273
402	-38.204	7.21267
402	-39.004	7.21335
402	-39.804	7.21358
402	-40.604	7.21708
402	-41.404	7.22405
402	-42.204	7.22305
402	-43.004	7.25992
402	-43.804	7.27176
402	-44.604	7.27321
402	-45.404	7.33832
402	-46.204	7.46041
402	-47.004	7.61774
402	-47.804	7.65968
402	-48.604	7.75743
402	-49.404	7.7604
402	-50.204	7.75489
402	-51.004	7.75408
402	-51.804	7.78614
402	-52.604	7.78762
402	-53.404	7.75864
402	-54.204	7.72712
402	-55.004	7.69373
402	-55.804	7.69279
402	-56.604	7.69535
402	-57.404	7.71782
402	-58.204	7.7699
402	-59.004	7.79783
402	-59.804	7.81753
402	-60.604	7.82704
402	-61.404	7.82625
402	-62.204	7.82764
402	-63.004	7.82998
402	-63.804	7.82537
402	-64.604	7.8046
402	-65.404	7.77417
402	-66.204	7.74903
402	-67.004	7.72843
402	-67.804	7.7387
402	-68.604	7.78261
402	-69.404	7.76238
402	-70.204	7.74089
402	-71.004	7.70697
402	-71.804	7.67773
402	-72.604	7.73773
402	-73.404	7.84142
402	-74.204	7.88589
402	-75.004	7.88462
402	-75.804	7.88816
402	-76.604	7.90721
402	-77.404	7.90863
402	-78.204	7.85802
438	1.878	5.9651
438	1.078	5.9672
438	0.278	6.03087
438	-0.522	6.2109
438	-1.322	6.2109
438	-2.122	6.2109
438	-2.922	6.16202
438	-3.722	6.03951
438	-4.522	6.32998
438	-5.322	6.39543
438	-6.122	6.39543
438	-6.922	6.39543
438	-7.722	6.20356
438	-8.522	5.759
438	-9.322	5.79022
438	-10.122	5.84237
438	-10.922	5.9711
438	-11.722	5.98592
438	-12.522	5.95709
438	-13.322	5.88044
438	-14.122	5.86521
438	-14.922	5.88869
438	-15.722	6.03581
438	-16.522	6.04698
438	-17.322	6.04698
438	-18.122	6.04698
438	-18.922	6.28546
438	-19.722	6.71144
438	-20.522	6.72363
438	-21.322	6.46327
438	-22.122	6.33187
438	-22.922	6.34486
438	-23.722	6.5414
438	-24.522	6.57967
438	-25.322	6.5686
438	-26.122	6.56588
438	-26.922	6.56556
438	-27.722	6.5642
438	-28.522	6.56222
438	-29.322	6.56221
438	-30.122	6.56221
438	-30.922	6.56221
438	-31.722	6.56221
438	-32.522	6.56221
438	-33.322	6.56221
438	-34.122	6.56221
438	-34.922	6.56221
438	-35.722	6.56221
438	-36.522	6.57483
438	-37.322	6.62003
438	-38.122	6.62556
438	-38.922	6.87555
438	-39.722	7.54782
438	-40.522	7.73338
438	-41.322	7.72873
438	-42.122	7.73213
438	-42.922	7.72434
438	-43.722	7.72355
438	-44.522	7.74025
438	-45.322	7.78142
438	-46.122	7.92379
438	-46.922	7.90319
438	-47.722	7.6799
438	-48.522	7.51694
438	-49.322	7.43916
438	-50.122	7.44548
438	-50.922	7.57418
438	-51.722	7.7177
438	-52.522	7.76995
438	-53.322	7.80186
438	-54.122	7.81315
438	-54.922	7.76343
438	-55.722	7.59854
438	-56.522	7.48996
438	-57.322	7.4793
438	-58.122	7.47791
438	-58.922	7.47939
438	-59.722	7.48222
438	-60.522	7.48068
438	-61.322	7.48519
438	-62.122	7.52848
438	-62.922	7.5743
438	-63.722	7.72174
438	-64.522	8.03376
438	-65.322	8.17015
438	-66.122	8.17615
438	-66.922	8.17615
438	-67.722	8.17615
438	-68.522	8.17615
438	-69.322	8.07948
438	-70.122	7.78837
438	-70.922	7.62579
438	-71.722	7.51446
438	-72.522	7.59484
438	-73.322	7.69051
438	-74.122	7.78792
438	-74.922	7.83184
438	-75.722	7.80286
438	-76.522	7.76388
438	-77.322	7.69571

## Sheet: Figure 4
Figure 4a
Longitude (°)	Latitude (°)	Distance on profile (km)	SAMPLE	LITHOLOGY	COMPOSITION_(MAFIC=1;_INTERMEDIATE=2;_FELSIC=3)	EMPLACEMENT_STYLE_(EXTRUSIVE=1;_INTRUSIVE=2)	BLOCK	AGE_(MA)	2-SIG_ERROR	METHOD	MATERIAL	AUTHOR	PUBLICATION
41.121	37.9663	103.946	ME_1-2	obsidian	3	1	Arabia_Platform	0.45		K-Ar		Ercan_et_al. _1990	MTA_Report
41.121	37.9663	103.946	ME_1	obsidian	3	1	Arabia_Platform	0.99		K-Ar		Ercan_et_al. _1990	MTA_Report
41.121	37.9663	103.946	ME_2	rhyolite	3	1	Arabia_Platform	5.75	0.46	K-Ar		Ercan_et_al. _1990	MTA_Report
41.4486	38.6918	187.019	2113	basalt	1	1	Eastern_Anatolia_Platform	4.4	0.16	K-Ar	whole_rock	Pearce_et_al. _1990	Journal_of_Volcanology_and_Geothermal_Research
41.4486	38.6918	187.019	2112	trachybasalt	1	1	Eastern_Anatolia_Platform	6	2	K-Ar	whole_rock	Pearce_et_al. _1990	Journal_of_Volcanology_and_Geothermal_Research
42.1982	38.6169	216.253	NE19	rhyolite	3	1	Eastern_Anatolia_Platform	0.01	unprovided	K-Ar	whole_rock	Notsu_et_al. _1995	Journal_of_Volcanology_and_Geothermal_Research
42.1982	38.6169	216.253	NE18	rhyolite	3	1	Eastern_Anatolia_Platform	0.02	unprovided	K-Ar	whole_rock	Notsu_et_al. _1995	Journal_of_Volcanology_and_Geothermal_Research
42.1982	38.6169	216.253	NE20	rhyolite	3	1	Eastern_Anatolia_Platform	0.02	0.02	K-Ar	whole_rock	Notsu_et_al. _1995	Journal_of_Volcanology_and_Geothermal_Research
42.1982	38.6169	216.253	NE27	olivine_basalt	1	1	Eastern_Anatolia_Platform	0.08	0.04	K-Ar	whole_rock	Notsu_et_al. _1995	Journal_of_Volcanology_and_Geothermal_Research
42.1982	38.6169	216.253	NE22	trachybasalt	1	1	Eastern_Anatolia_Platform	0.1	0.1	K-Ar	whole_rock	Notsu_et_al. _1995	Journal_of_Volcanology_and_Geothermal_Research
42.1982	38.6169	216.253	2313	trachyte	2	1	Eastern_Anatolia_Platform	0.7	unprovided	K-Ar	whole_rock	Pearce_et_al. _1990	Journal_of_Volcanology_and_Geothermal_Research
42.1982	38.6169	216.253	2362	basalt	1	1	Eastern_Anatolia_Platform	1.18	0.46	K-Ar	whole_rock	Pearce_et_al. _1990	Journal_of_Volcanology_and_Geothermal_Research
42.1934	38.6475	218.837	NE_2	obsidian	3	1	Eastern_Anatolia_Platform	0.03		K-Ar		Ercan_et_al. _1990	MTA_Report
42.1934	38.6475	218.837	NE_1	trachybasalt	1	1	Eastern_Anatolia_Platform	2.5		K-Ar		Ercan_et_al. _1990	MTA_Report
41.8478	39.122	245.988	2211	rhyolite	3	1	Eastern_Anatolia_Platform	2.6	0.4	K-Ar	whole_rock	Pearce_et_al. _1990	Journal_of_Volcanology_and_Geothermal_Research
41.8478	39.122	245.988	2213	trachyandesite	2	1	Eastern_Anatolia_Platform	3.6	0.12	K-Ar	whole_rock	Pearce_et_al. _1990	Journal_of_Volcanology_and_Geothermal_Research
42.5671	38.941	264.017	AG_20	dacite	3	1	Eastern_Anatolia_Platform	5.8	0.3	K-Ar	groundmass	Innocenti_et_al. _1976	Journal_of_Volcanology_and_Geothermal_Research
42.8261	38.8647	269.632	AG_25	andesite	2	1	Eastern_Anatolia_Platform	0.7	0.28	K-Ar	groundmass	Innocenti_et_al. _1976	Journal_of_Volcanology_and_Geothermal_Research
42.8267	38.924	275.102	SU02	augite-hypersthene_andesite	2	1	Eastern_Anatolia_Platform	0.1	0.04	K-Ar	whole_rock	Notsu_et_al. _1995	Journal_of_Volcanology_and_Geothermal_Research
42.8267	38.924	275.102	2531	trachyte	2	1	Eastern_Anatolia_Platform	0.23	0.38	K-Ar	whole_rock	Pearce_et_al. _1990	Journal_of_Volcanology_and_Geothermal_Research
42.8267	38.924	275.102	2521	trachyte	2	1	Eastern_Anatolia_Platform	0.36	0.3	K-Ar	whole_rock	Pearce_et_al. _1990	Journal_of_Volcanology_and_Geothermal_Research
42.8282	38.9333	276.026	SU_2	andesite	2	1	Eastern_Anatolia_Platform	0.28		K-Ar		Ercan_et_al. _1990	MTA_Report
42.8071	38.9875	279.971	AG_27	rhyolite	3	1	Eastern_Anatolia_Platform	0.5	0.2	K-Ar	biotite	Innocenti_et_al. _1976	Journal_of_Volcanology_and_Geothermal_Research
42.8309	38.9758	280.064	AG_31	rhyolite	3	1	Eastern_Anatolia_Platform	0.4	0.16	K-Ar	whole_rock	Innocenti_et_al. _1976	Journal_of_Volcanology_and_Geothermal_Research
42.9859	38.9479	285.085	AG_55	hawaiite	1	1	Eastern_Anatolia_Platform	5.4	0.2	K-Ar	whole_rock	Innocenti_et_al. _1976	Journal_of_Volcanology_and_Geothermal_Research
42.8793	39.1292	296.499	AG_13	dacite	3	1	Eastern_Anatolia_Platform	5.7	0.3	K-Ar	biotite	Innocenti_et_al. _1976	Journal_of_Volcanology_and_Geothermal_Research
43.1691	39.1199	309.803	AG_19	hawaiite	1	1	Eastern_Anatolia_Platform	4.6	0.2	K-Ar	whole_rock	Innocenti_et_al. _1976	Journal_of_Volcanology_and_Geothermal_Research
43.3601	39.078	315.34	AG_7	benmorite	2	1	Eastern_Anatolia_Platform	5.6	2.2	K-Ar	whole_rock	Innocenti_et_al. _1976	Journal_of_Volcanology_and_Geothermal_Research
43.191	39.252	322.964	AG_120	alkali_basalt	1	1	Eastern_Anatolia_Platform	6.2	0.4	K-Ar	whole_rock	Innocenti_et_al. _1976	Journal_of_Volcanology_and_Geothermal_Research
42.1283	39.862	327.737	AG_231	andesite	2	1	Eastern_Anatolia_Platform	5.6	0.6	K-Ar	unspecified	Innocenti_et_al. _1982	Journal_of_Volcanology_and_Geothermal_Research
43.7685	39.046	332.563	AG_3	dacite	3	1	Eastern_Anatolia_Platform	3.9	0.2	K-Ar	biotite	Innocenti_et_al. _1976	Journal_of_Volcanology_and_Geothermal_Research
41.9718	40.0127	334.217	HO_1	basalt	1	1	Eastern_Anatolia_Platform	1.61	0.71	K-Ar		Ercan_et_al. _1990	MTA_Report
42.6873	39.7123	340.736	KO_1	dacite	3	1	Eastern_Anatolia_Platform	11.4	0.9	K-Ar		Ercan_et_al. _1990	MTA_Report
42.2883	39.9556	343.997	AG_247	rhyolite	3	1	Eastern_Anatolia_Platform	6.9	1.8	K-Ar	unspecified	Innocenti_et_al. _1982	Journal_of_Volcanology_and_Geothermal_Research
43.432	39.365	345.1	ET_1	dacite	3	1	Eastern_Anatolia_Platform	3.91	0.55	K-Ar		Ercan_et_al. _1990	MTA_Report
42.1994	40.0438	347.892	MK145	andesite	2	1	Eastern_Anatolia_Platform	4.59	0.38	K-Ar	unspecified	Keskin_et_al. _1998	Journal_of_Volcanology_and_Geothermal_Research
42.1742	40.058	348.005	MK134	dacite	3	1	Eastern_Anatolia_Platform	4.14	0.42	K-Ar	unspecified	Keskin_et_al. _1998	Journal_of_Volcanology_and_Geothermal_Research
42.1742	40.058	348.005	MK138	basaltic_andesite	1	1	Eastern_Anatolia_Platform	9.94	0.8	K-Ar	unspecified	Keskin_et_al. _1998	Journal_of_Volcanology_and_Geothermal_Research
42.1742	40.058	348.005	MK144	basalt	1	1	Eastern_Anatolia_Platform	11.1	0.1	K-Ar	unspecified	Keskin_et_al. _1998	Journal_of_Volcanology_and_Geothermal_Research
43.9098	39.1762	351.422	CA_1	trachybasalt	1	1	Eastern_Anatolia_Platform	0.49		K-Ar		Ercan_et_al. _1990	MTA_Report
43.7884	39.3727	363.32	TE_1-2	andesite	2	1	Eastern_Anatolia_Platform	0.03		K-Ar		Ercan_et_al. _1990	MTA_Report
43.7884	39.3727	363.32	TE_1	andesite	2	1	Eastern_Anatolia_Platform	0.07		K-Ar		Ercan_et_al. _1990	MTA_Report
43.7884	39.3727	363.32	TE_2	basalt	1	1	Eastern_Anatolia_Platform	0.56	0.16	K-Ar		Ercan_et_al. _1990	MTA_Report
43.8737	39.35	365.454	TE01	olivine-augite_trachyandesite	2	1	Eastern_Anatolia_Platform	0.013	0.004	K-Ar	whole_rock	Notsu_et_al. _1995	Journal_of_Volcanology_and_Geothermal_Research
43.8737	39.35	365.454	TE02	olivine-augite_trachybasalt	1	1	Eastern_Anatolia_Platform	0.4	0.04	K-Ar	whole_rock	Notsu_et_al. _1995	Journal_of_Volcanology_and_Geothermal_Research
42.8768	40.2269	397.091	MK147	andesite	2	1	Eastern_Anatolia_Platform	3.55	0.26	K-Ar	unspecified	Keskin_et_al. _1998	Journal_of_Volcanology_and_Geothermal_Research
43.3253	40.0397	401.567	AG_226	andesite	2	1	Eastern_Anatolia_Platform	4.4	0.4	K-Ar	unspecified	Innocenti_et_al. _1982	Journal_of_Volcanology_and_Geothermal_Research
42.707	40.3888	403.83	AG_239	andesite	2	1	Eastern_Anatolia_Platform	3.6	0.4	K-Ar	unspecified	Innocenti_et_al. _1982	Journal_of_Volcanology_and_Geothermal_Research
42.9324	40.3214	408.429	AG_227	andesite	2	1	Eastern_Anatolia_Platform	3.9	0.4	K-Ar	unspecified	Innocenti_et_al. _1982	Journal_of_Volcanology_and_Geothermal_Research
42.9928	40.3013	409.478	MK175	basaltic_trachyandesite	1	1	Eastern_Anatolia_Platform	2.72	0.2	K-Ar	unspecified	Keskin_et_al. _1998	Journal_of_Volcanology_and_Geothermal_Research
43.1143	40.3035	415.515	MK162	basaltic_andesite	1	1	Eastern_Anatolia_Platform	3.4	0.2	K-Ar	unspecified	Keskin_et_al. _1998	Journal_of_Volcanology_and_Geothermal_Research
43.1143	40.3035	415.515	MK169	trachydacite	3	1	Eastern_Anatolia_Platform	5.15	0.4	K-Ar	unspecified	Keskin_et_al. _1998	Journal_of_Volcanology_and_Geothermal_Research
44.2383	39.7045	415.689	AR_2	andesite	2	1	Eastern_Anatolia_Platform	0.45		K-Ar		Ercan_et_al. _1990	MTA_Report
44.2383	39.7045	415.689	AR_2-1	andesite	2	1	Eastern_Anatolia_Platform	0.49		K-Ar		Ercan_et_al. _1990	MTA_Report
44.2948	39.7067	418.694	AR11	augite_hypersthene_andesite	2	1	Eastern_Anatolia_Platform	0.02	unprovided	K-Ar	whole_rock	Notsu_et_al. _1995	Journal_of_Volcanology_and_Geothermal_Research
44.2948	39.7067	418.694	AR01	andesite	2	1	Eastern_Anatolia_Platform	0.02	0.06	K-Ar	whole_rock	Notsu_et_al. _1995	Journal_of_Volcanology_and_Geothermal_Research
44.2948	39.7067	418.694	AR02	hypersthene-augite_andesite	2	1	Eastern_Anatolia_Platform	0.1	unprovided	K-Ar	whole_rock	Notsu_et_al. _1995	Journal_of_Volcanology_and_Geothermal_Research
44.2948	39.7067	418.694	3132	basalt	1	1	Eastern_Anatolia_Platform	1.51	0.38	K-Ar	whole_rock	Pearce_et_al. _1990	Journal_of_Volcanology_and_Geothermal_Research
43.3434	40.2391	420.673	AG_245	rhyolite	3	1	Eastern_Anatolia_Platform	2.7	0.6	K-Ar	unspecified	Innocenti_et_al. _1982	Journal_of_Volcanology_and_Geothermal_Research
43.0899	40.518	433.993	AG_222	andesite	2	1	Eastern_Anatolia_Platform	3.7	0.8	K-Ar	unspecified	Innocenti_et_al. _1982	Journal_of_Volcanology_and_Geothermal_Research
43.4107	40.3848	437.243	AG_241	olivine_basalt	1	1	Eastern_Anatolia_Platform	1.6	0.4	K-Ar	unspecified	Innocenti_et_al. _1982	Journal_of_Volcanology_and_Geothermal_Research
43.322	40.4935	442.898	AG_237	olivine_basalt	1	1	Eastern_Anatolia_Platform	1.3	0.6	K-Ar	unspecified	Innocenti_et_al. _1982	Journal_of_Volcanology_and_Geothermal_Research

## Sheet: Figure 6
Figure 6
		Uplift duration (Myr)	Topography (km)	Crust thickness (km)	Middle crust (km)
	EAP	12	1.7	48	10
	Andes	23	4.5	63	25
	Tibet-I	>60	5.6	75	40
	Tibet-II	>60	5.6	75	45
	Note: The middle crustal layer is defined as the layer between the brittle upper crust and the mafic lower crust
